# Supplementary material for: Gold-catalyzed tandem reaction in water: an efficient and convenient synthesis of fused polycyclic indoles
Source: Royal Society of Chemistry journal article supplement (doi:10.1039/c2gc35293a), 2012-01-01

# **Gold-catalyzed tandem reaction in water: An efficient and convenient synthesis of fused polycyclic indoles**

Enguang Feng, Yu Zhou, Fei Zhao, Xianjie Chen, Lei Zhang, Hualiang Jiang,

Hong Liu\*

\*The Center for Drug Discovery and Design, State Key Laboratory of Drug Research,  
Shanghai Institute of Materia Medica, Shanghai Institutes for Biological Sciences,  
Chinese Academy of Sciences, Shanghai, 201203, China

Fax: (+86) 21-50807088

Email: [hliu@mail.shcnc.ac.cn](mailto:hliu@mail.shcnc.ac.cn).

## **Contents**

|                                                                              |               |
|------------------------------------------------------------------------------|---------------|
| <b>X-ray Crystallographic Structure of 3i .....</b>                          | <b>S2</b>     |
| <b>General Information .....</b>                                             | <b>S3</b>     |
| <b>General procedure for the Coupling reaction .....</b>                     | <b>S3</b>     |
| <b>Copies of <sup>1</sup>H NMR and <sup>13</sup>C NMR of Compounds .....</b> | <b>S4-S65</b> |

### The Crystal Structure of **3i** by X-ray Analysis.

X-ray crystallographic data of **3i** were solutions at  $T = 132(2)$  K:  $C_{15}H_{15}ClN_2O$ ,  $M_r = 274.74$ , Monoclinic, Space group  $p2(1)$ ,  $a = 7.062(3)$  Å,  $b = 7.575(4)$  Å,  $c = 12.479(4)$  Å,  $\alpha=90^\circ$ ,  $\beta=102.770(7)^\circ$ ,  $\gamma= 90^\circ$ ,  $V=651.1(5)$  Å<sup>3</sup>,  $Z=2$ .. CCDC 857524 contains the supplementary crystallographic data for this paper.

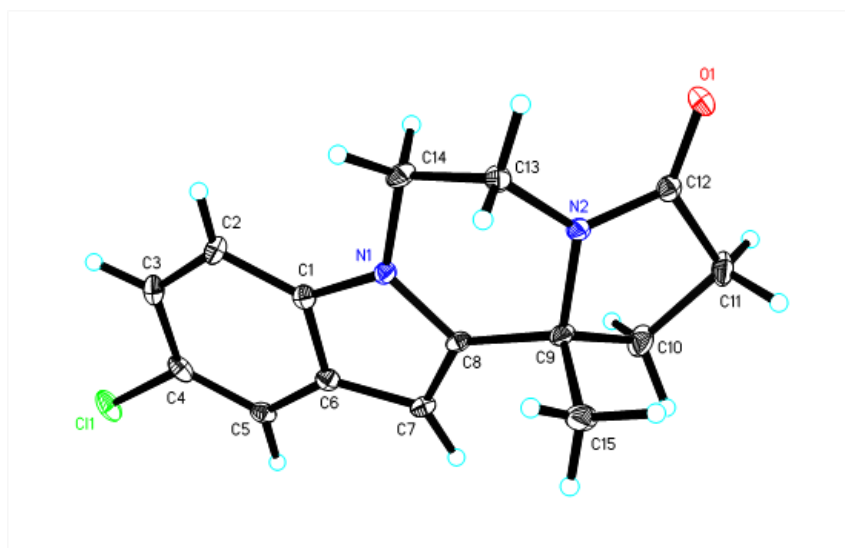

**Figure 1.** The Crystal Structure of **3i** by X-ray Analysis.

These data can be obtained free of charge from The Cambridge Crystallographic Data Centre via [www.ccdc.cam.ac.uk/data\\_request/cif](http://www.ccdc.cam.ac.uk/data_request/cif).

## General Information

Microwave method in one-pot process for compound **3a-3h**, **3Aa**, **3Ab**, **3Ah** and **3Ai**. A mixture of 2-(1*H*-indol-1-yl) ethanamines **1** (0.2 mmol), 4-pentynoic acid **2** (0.3 mmol) and Au catalyst **X** (0.02 mmol) was stirred in water (2 mL) under air. The vial was sealed and the mixture was then irradiated for 30 min at 150 °C. After the reaction was cooled to ambient temperature, the crude reaction mixture was extracted three times with ethyl acetate (EA) (3 x 15 mL). The combined organic phase was washed with saturated NaHCO<sub>3</sub> solution, brine, dried with Na<sub>2</sub>SO<sub>4</sub> and concentrated. The residue was purified by column chromatography on CombiFlash® to provide the desired product.

### **Microwave method in the two-step one-pot process for compound 3h-3s, 3Aa-3Al.**

A mixture of 2-(1*H*-indol-1-yl) ethanamines **1** (0.2 mmol), alkynoic acid **2** (0.3 mmol) and Au catalyst **X** (0.02 mmol) was stirred in water (2 mL) under air. The vial was sealed and the mixture was then irradiated for 30 min at 150 °C. After the reaction was cooled, CF<sub>3</sub>COOH (0.2 mmol) was added into the reaction mixture, then irradiated for another 30 min at 150 °C. After the reaction was cooled to ambient temperature, the crude reaction mixture was extracted three times with ethyl acetate (EA) (3 x 15 mL). The combined organic phase was washed with saturated NaHCO<sub>3</sub> solution, brine, dried with Na<sub>2</sub>SO<sub>4</sub> and concentrated. The residue was purified by column chromatography on CombiFlash® to provide the desired product.

### **Classical method using a thermostatted oil bath for compound 3a, 3b and 3e.**

A mixture of 2-(1*H*-indol-1-yl) ethanamines **1** (0.2 mmol), 4-pentynoic acid **2** (0.3 mmol) and Au catalyst (0.02 mmol) was stirred in water (2 mL) under air. The vial was sealed and the mixture was then stirred at 100 °C with oil heating for 16 h. After the reaction was cooled to ambient temperature, the crude reaction mixture was extracted three times with ethyl acetate (EA) (3 x 15 mL). The combined organic phase was washed with saturated NaHCO<sub>3</sub> solution, brine, dried with Na<sub>2</sub>SO<sub>4</sub> and concentrated. The residue was purified by column chromatography on CombiFlash® to provide the desired product.

## Copies of $^1\text{H}$ NMR and $^{13}\text{C}$ NMR of Fused Polycyclic Indoles

### Compound 3a

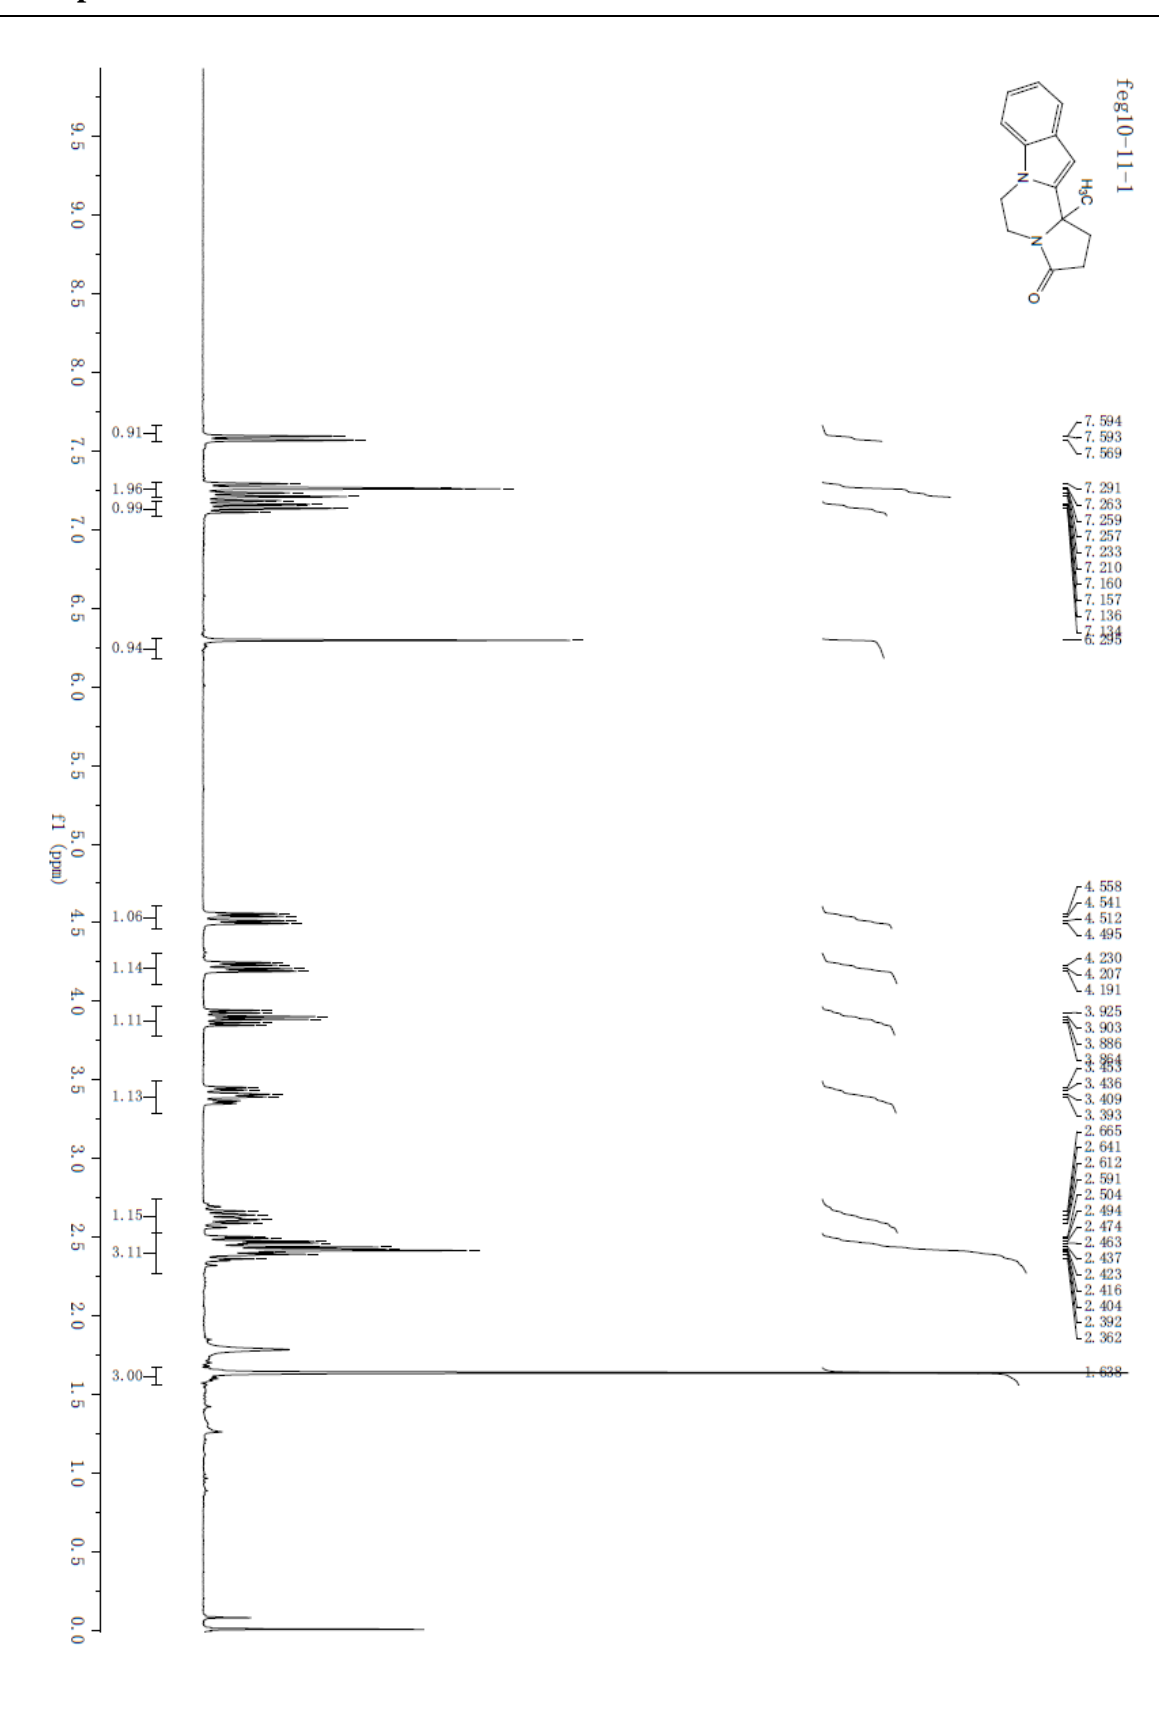

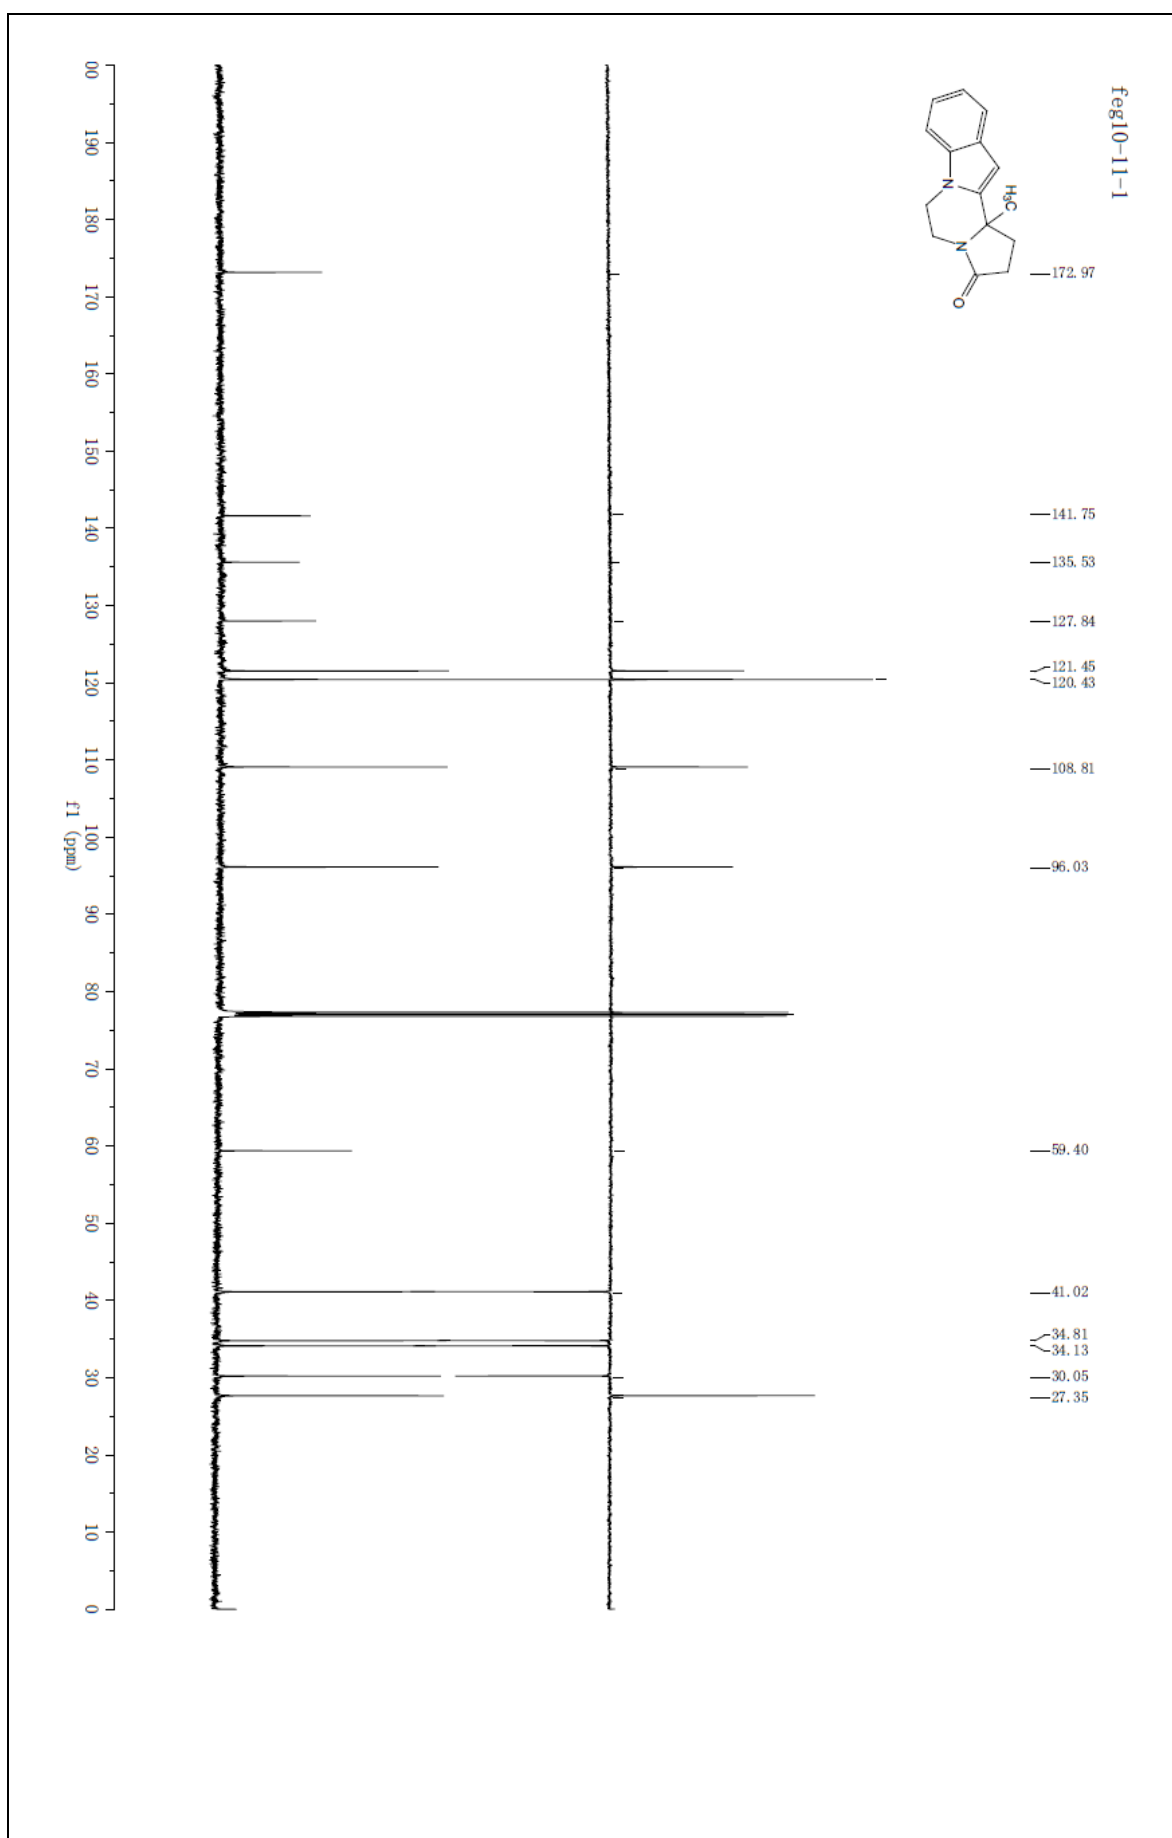

# Compound 3b

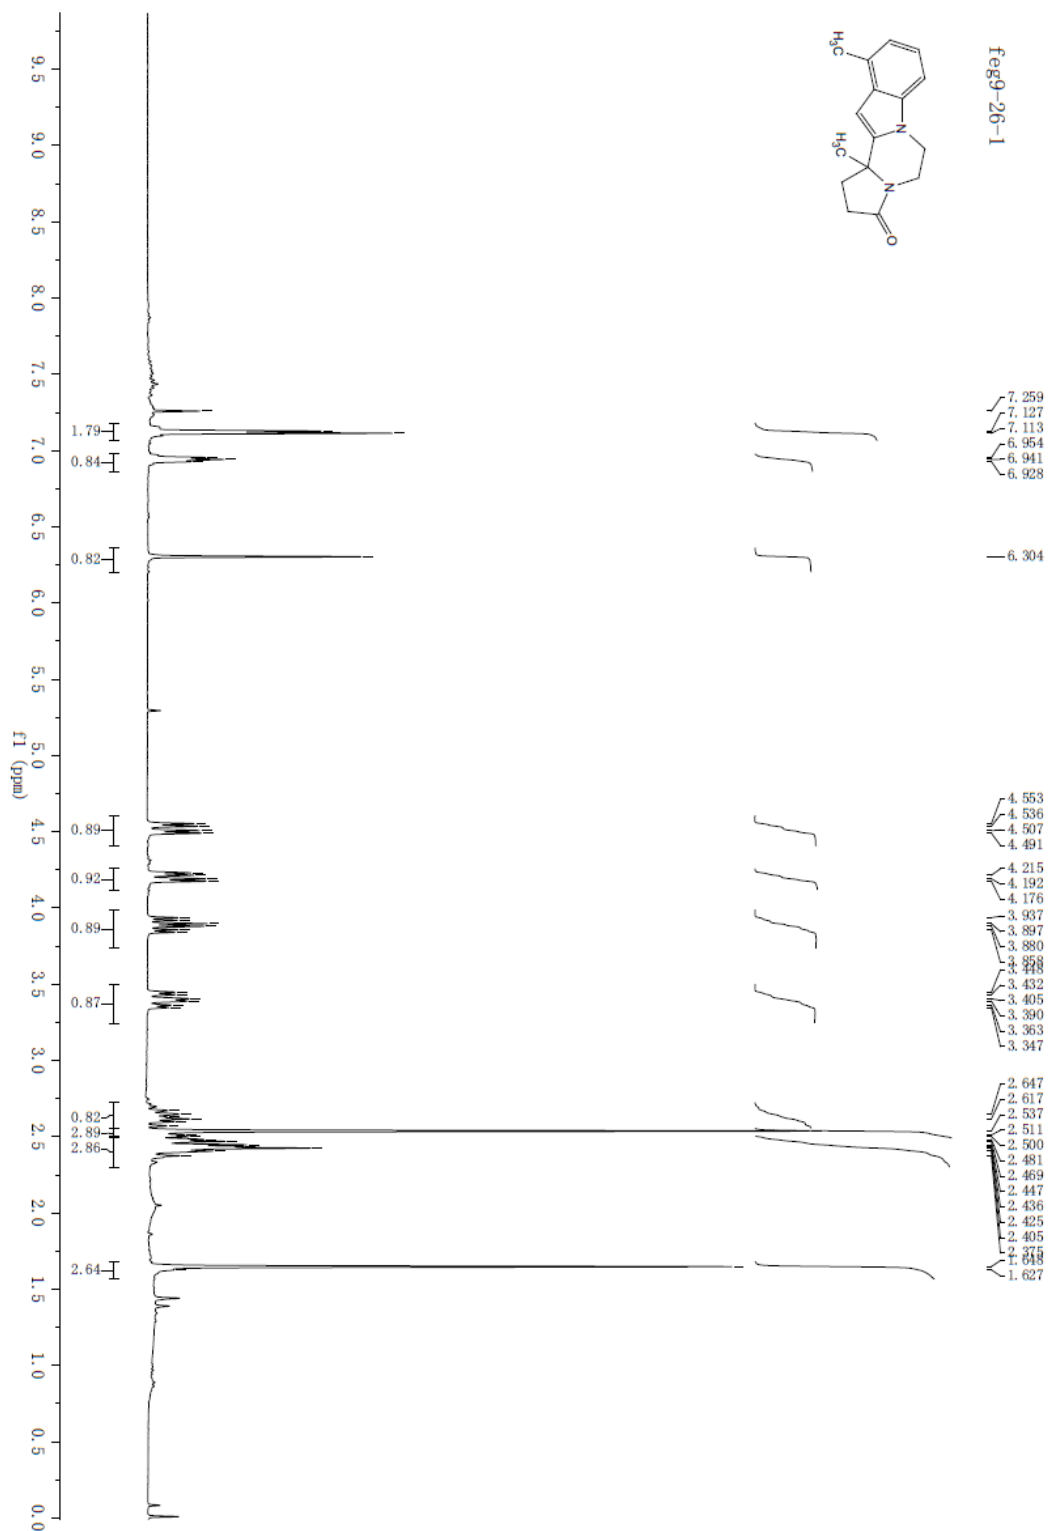

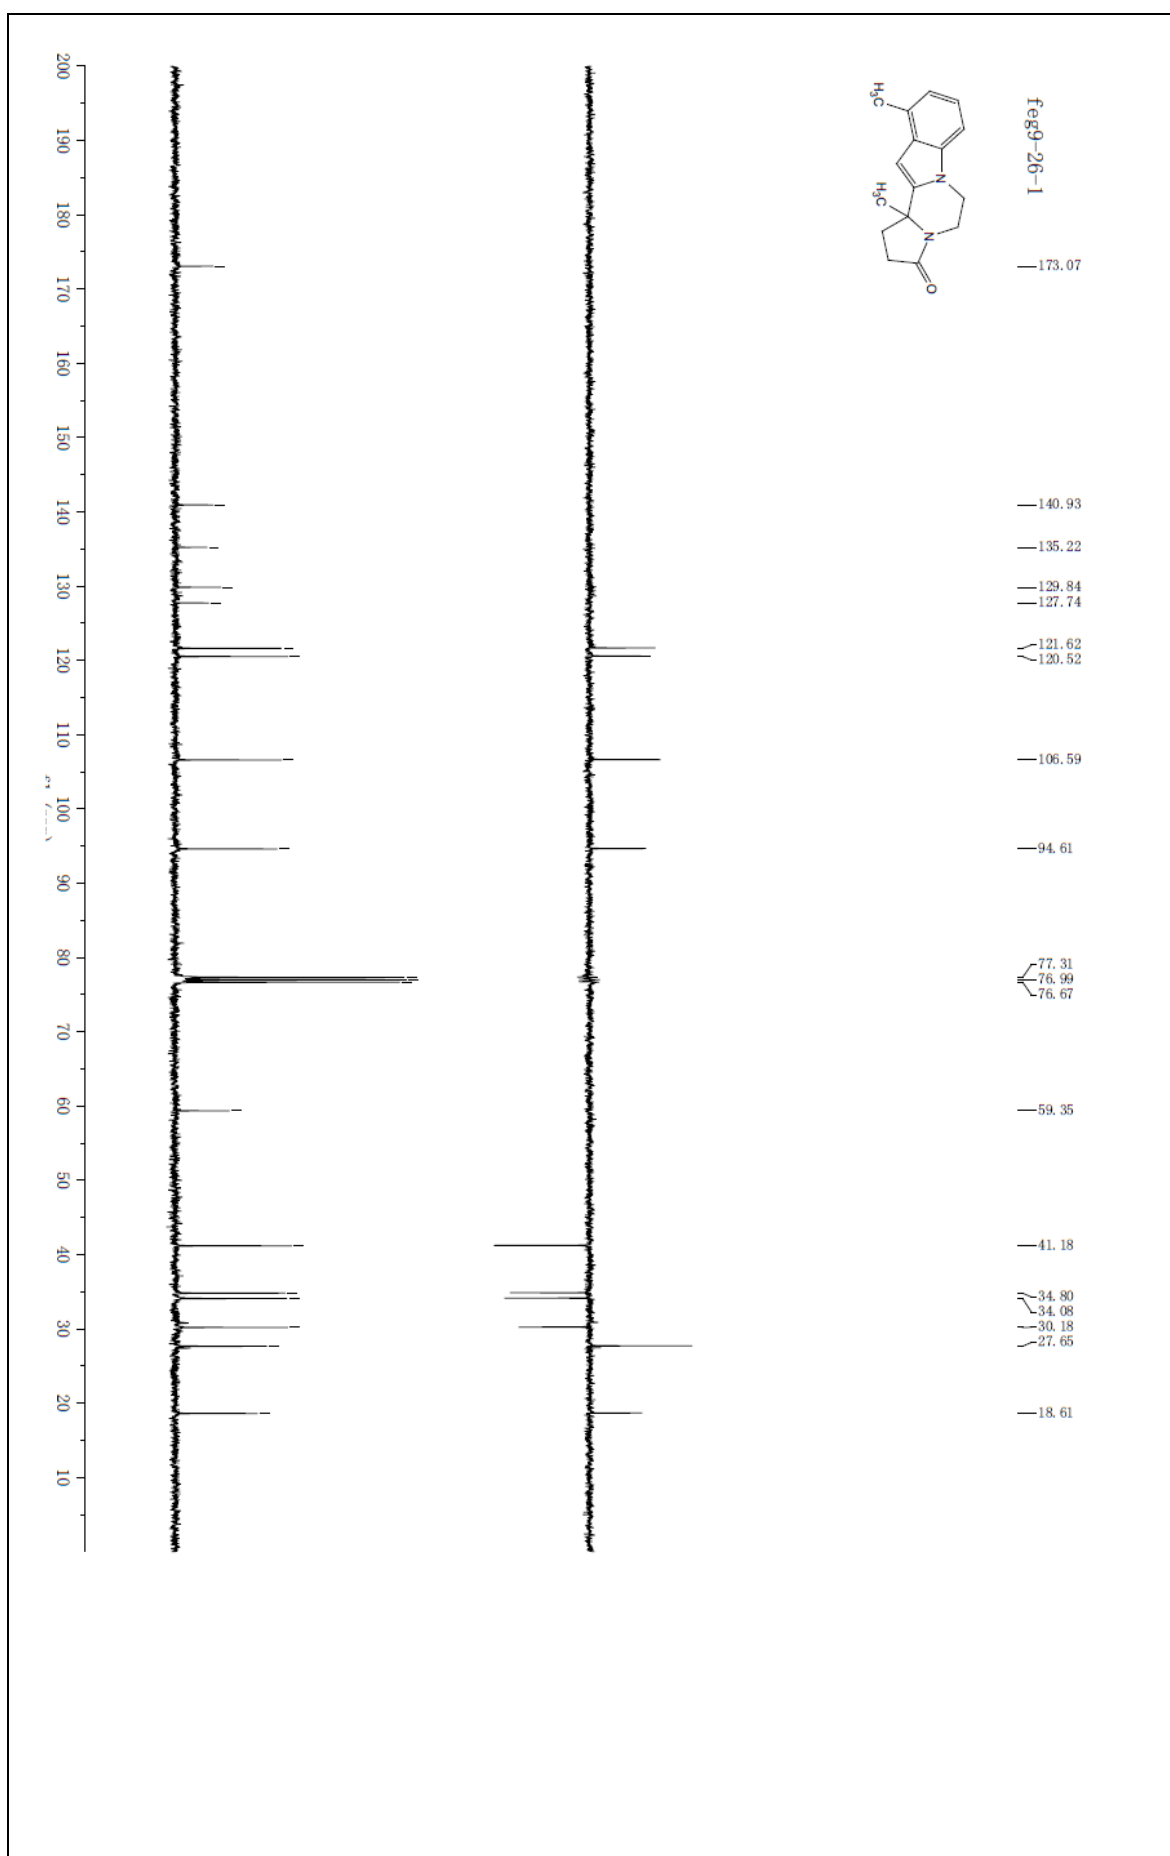

# Compound 3c

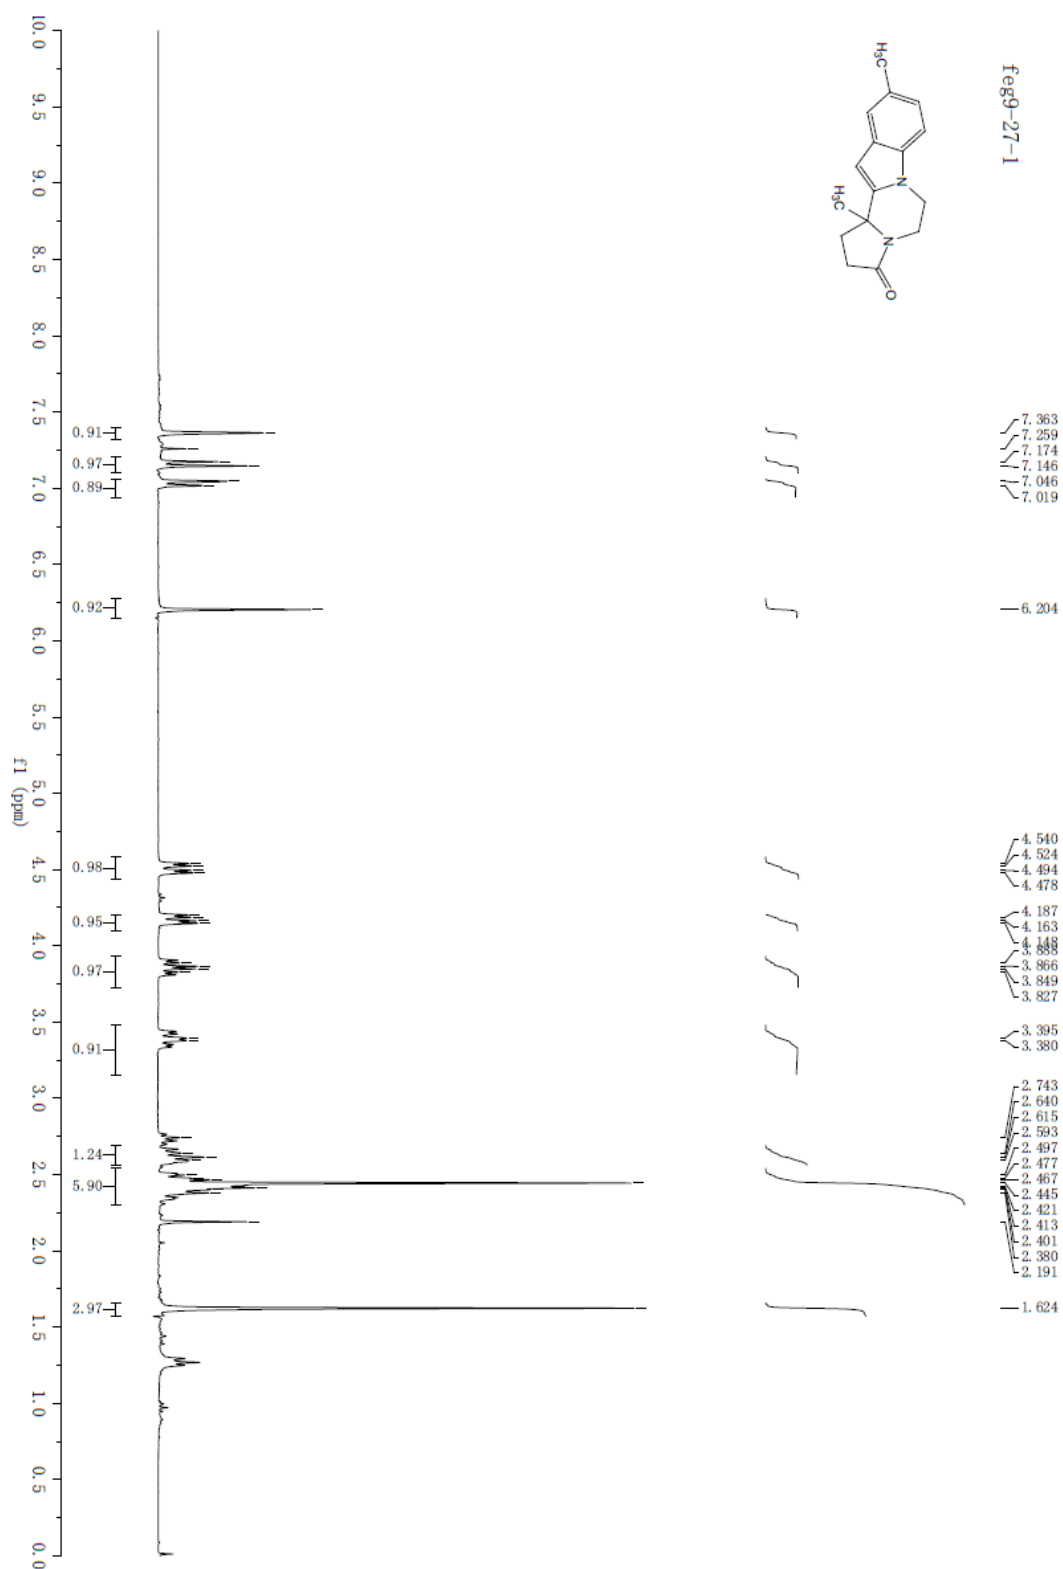



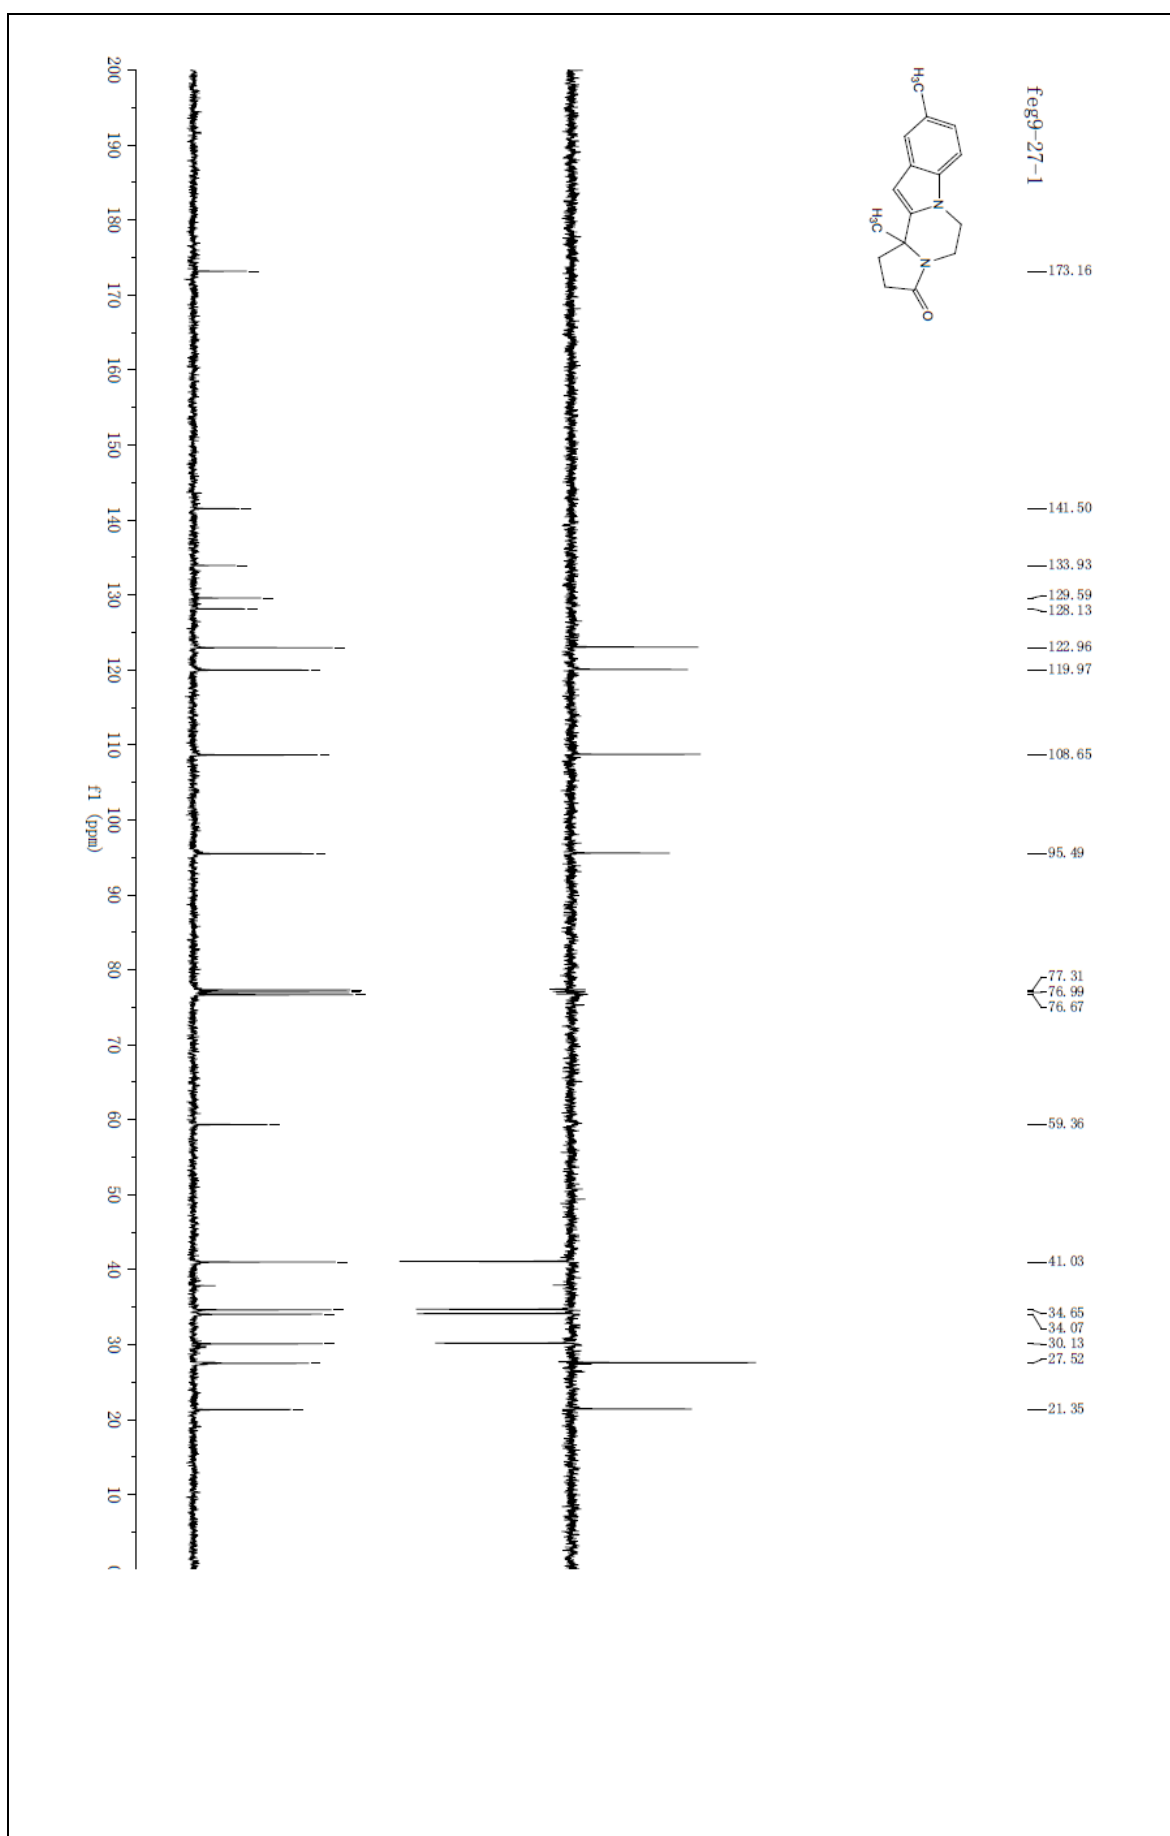

# Compound 3d

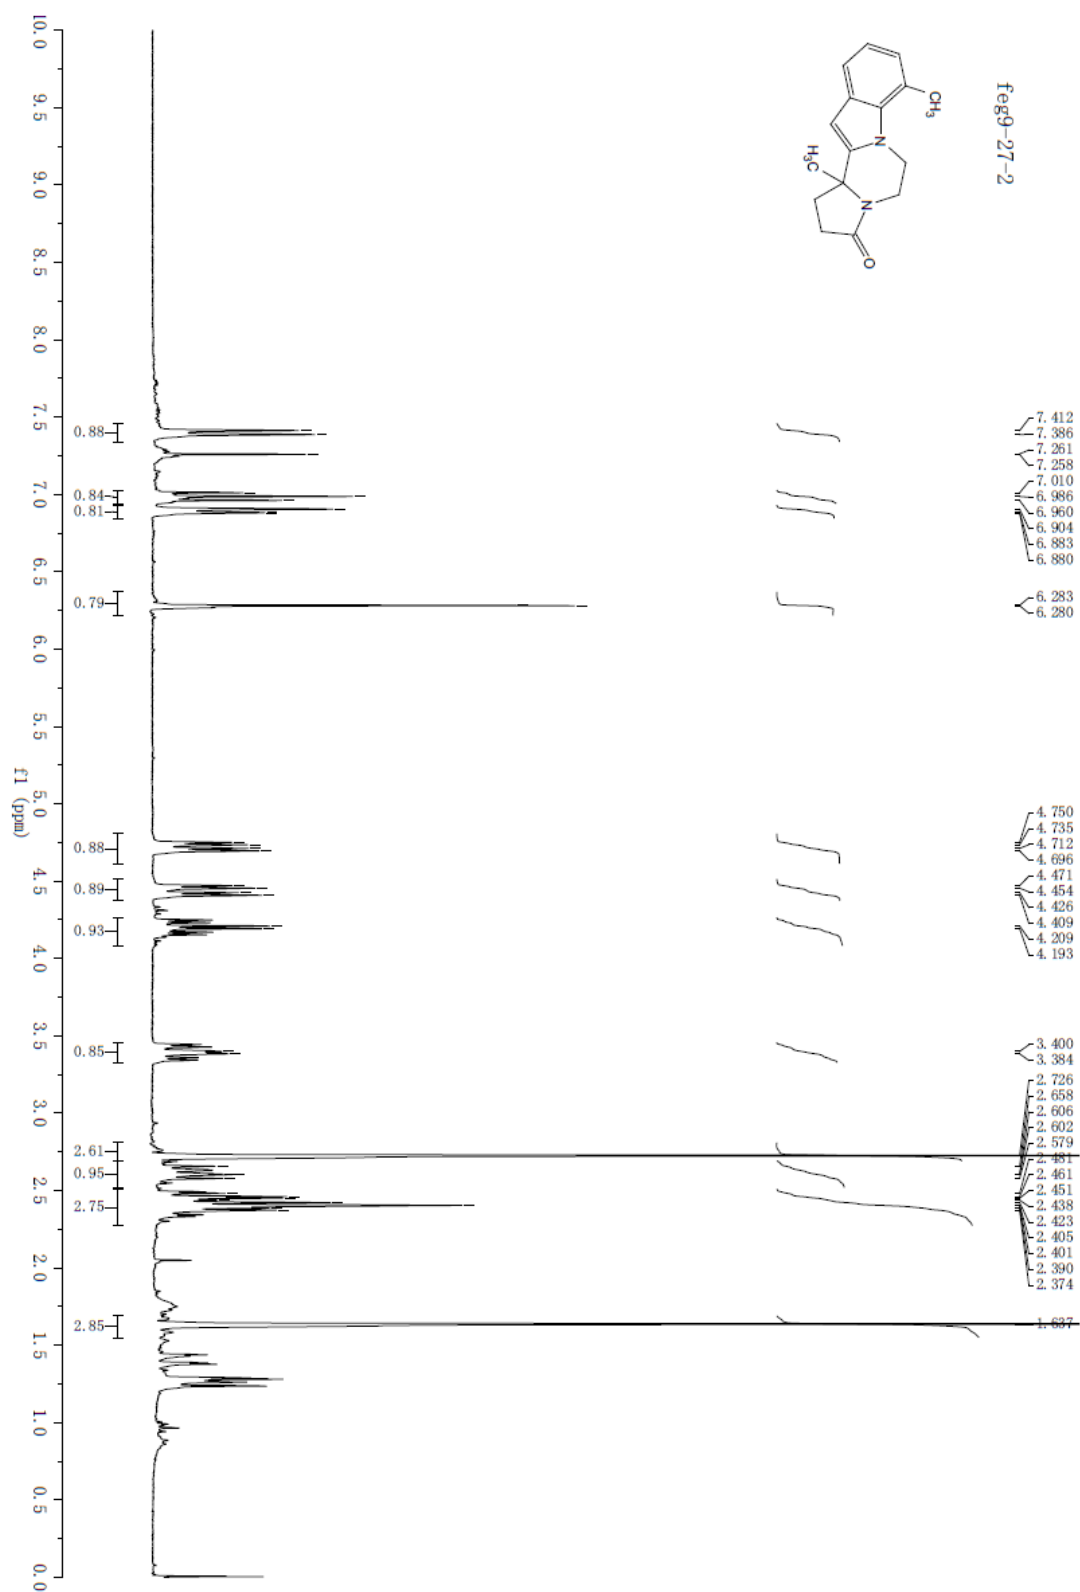

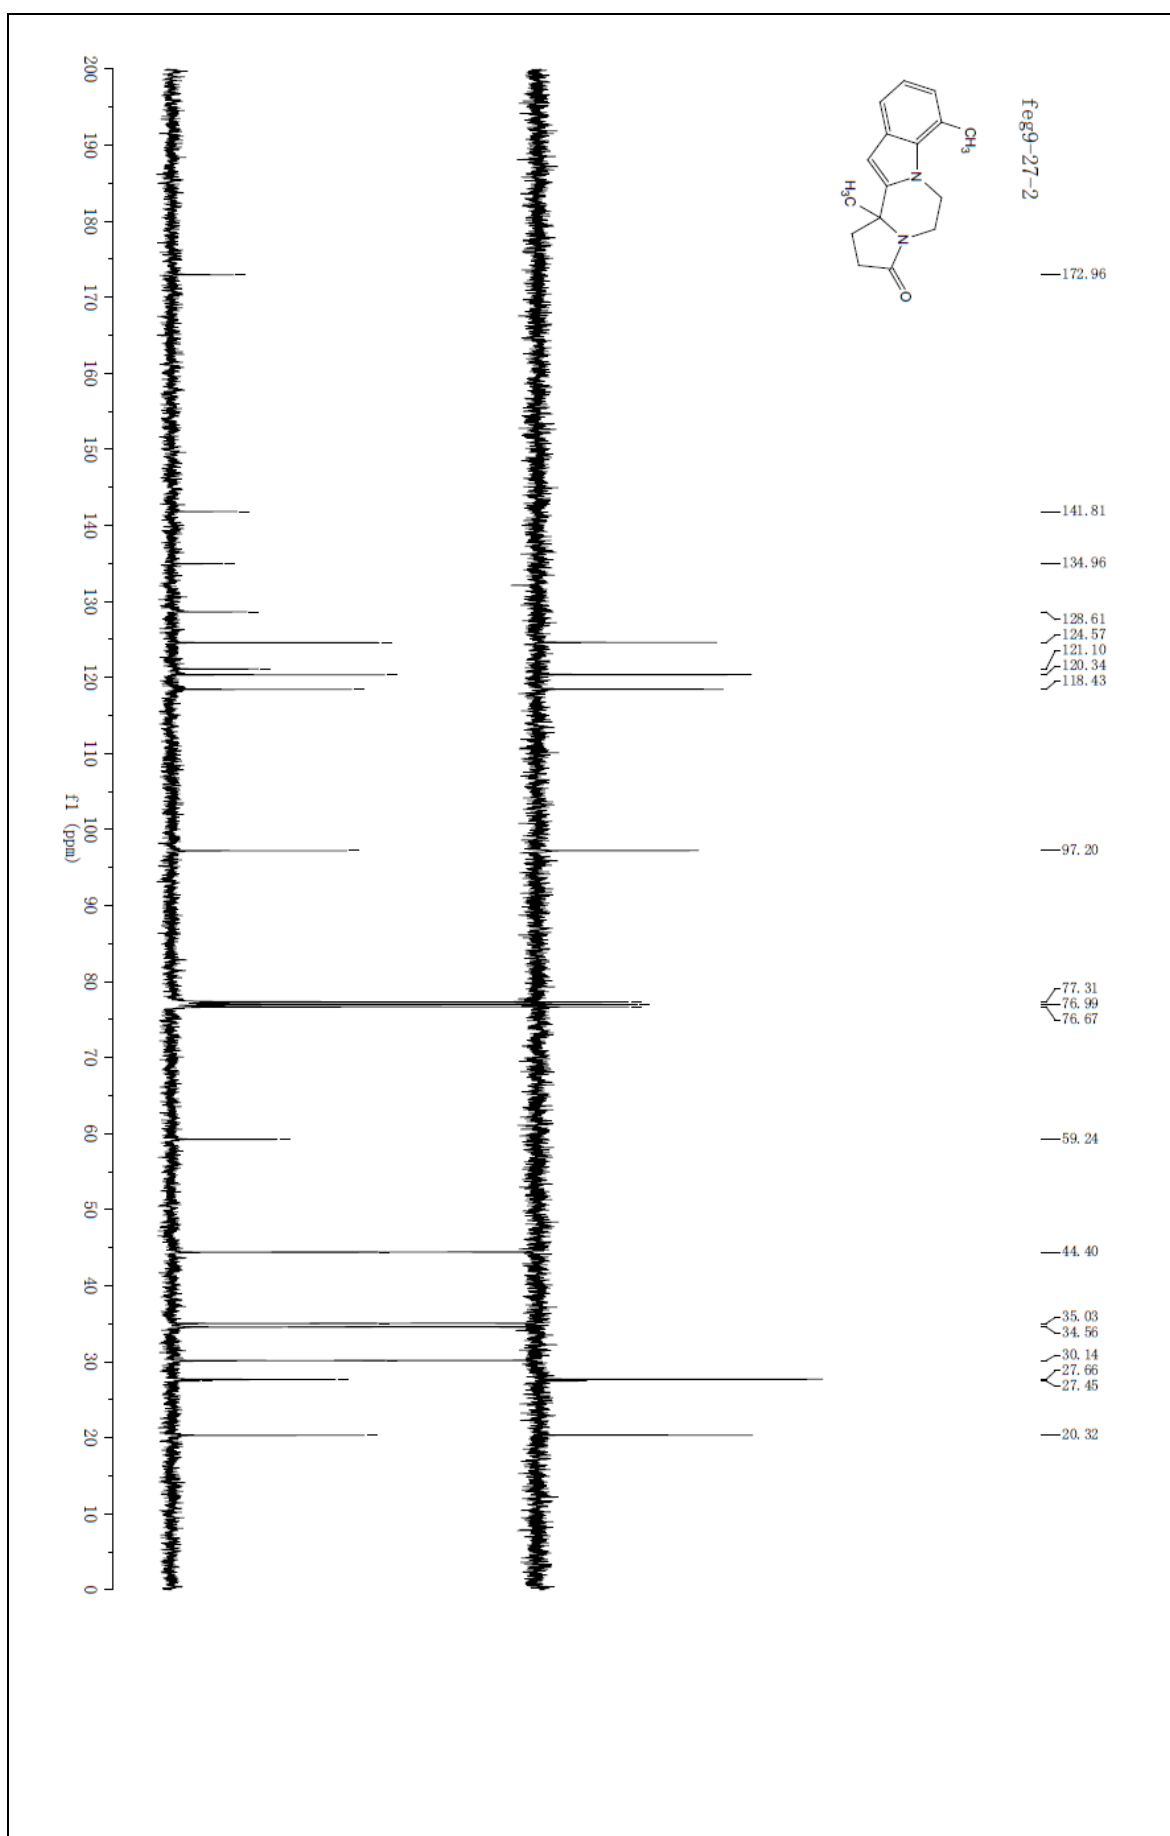

# Compound 3e

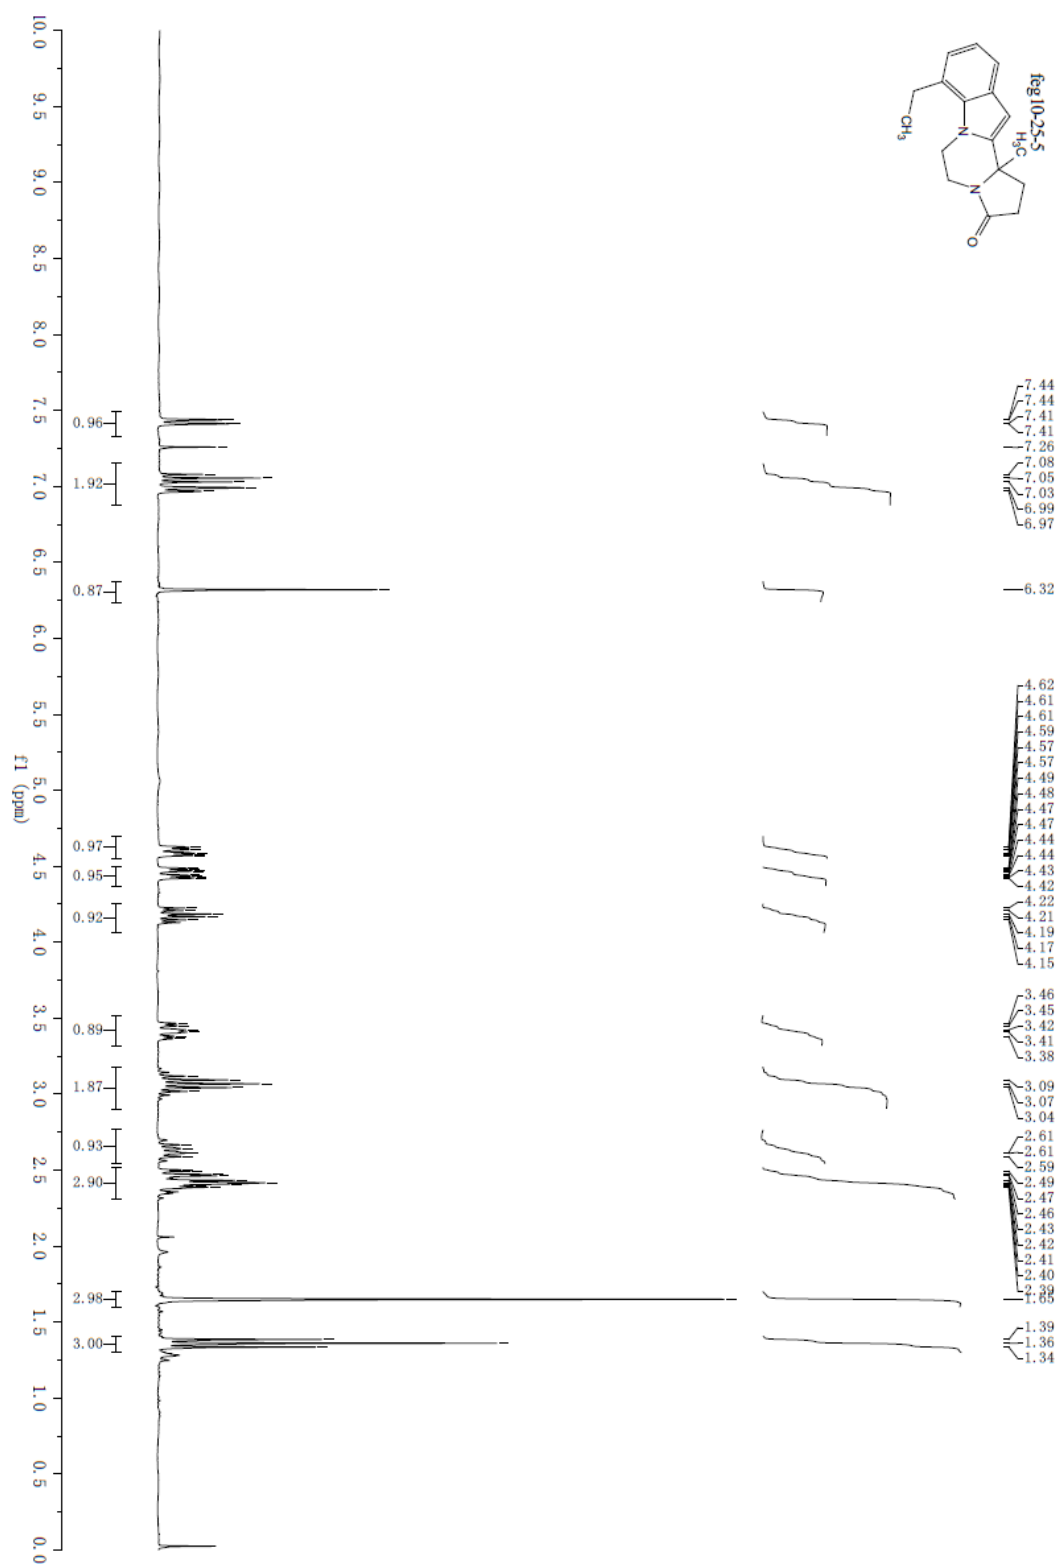

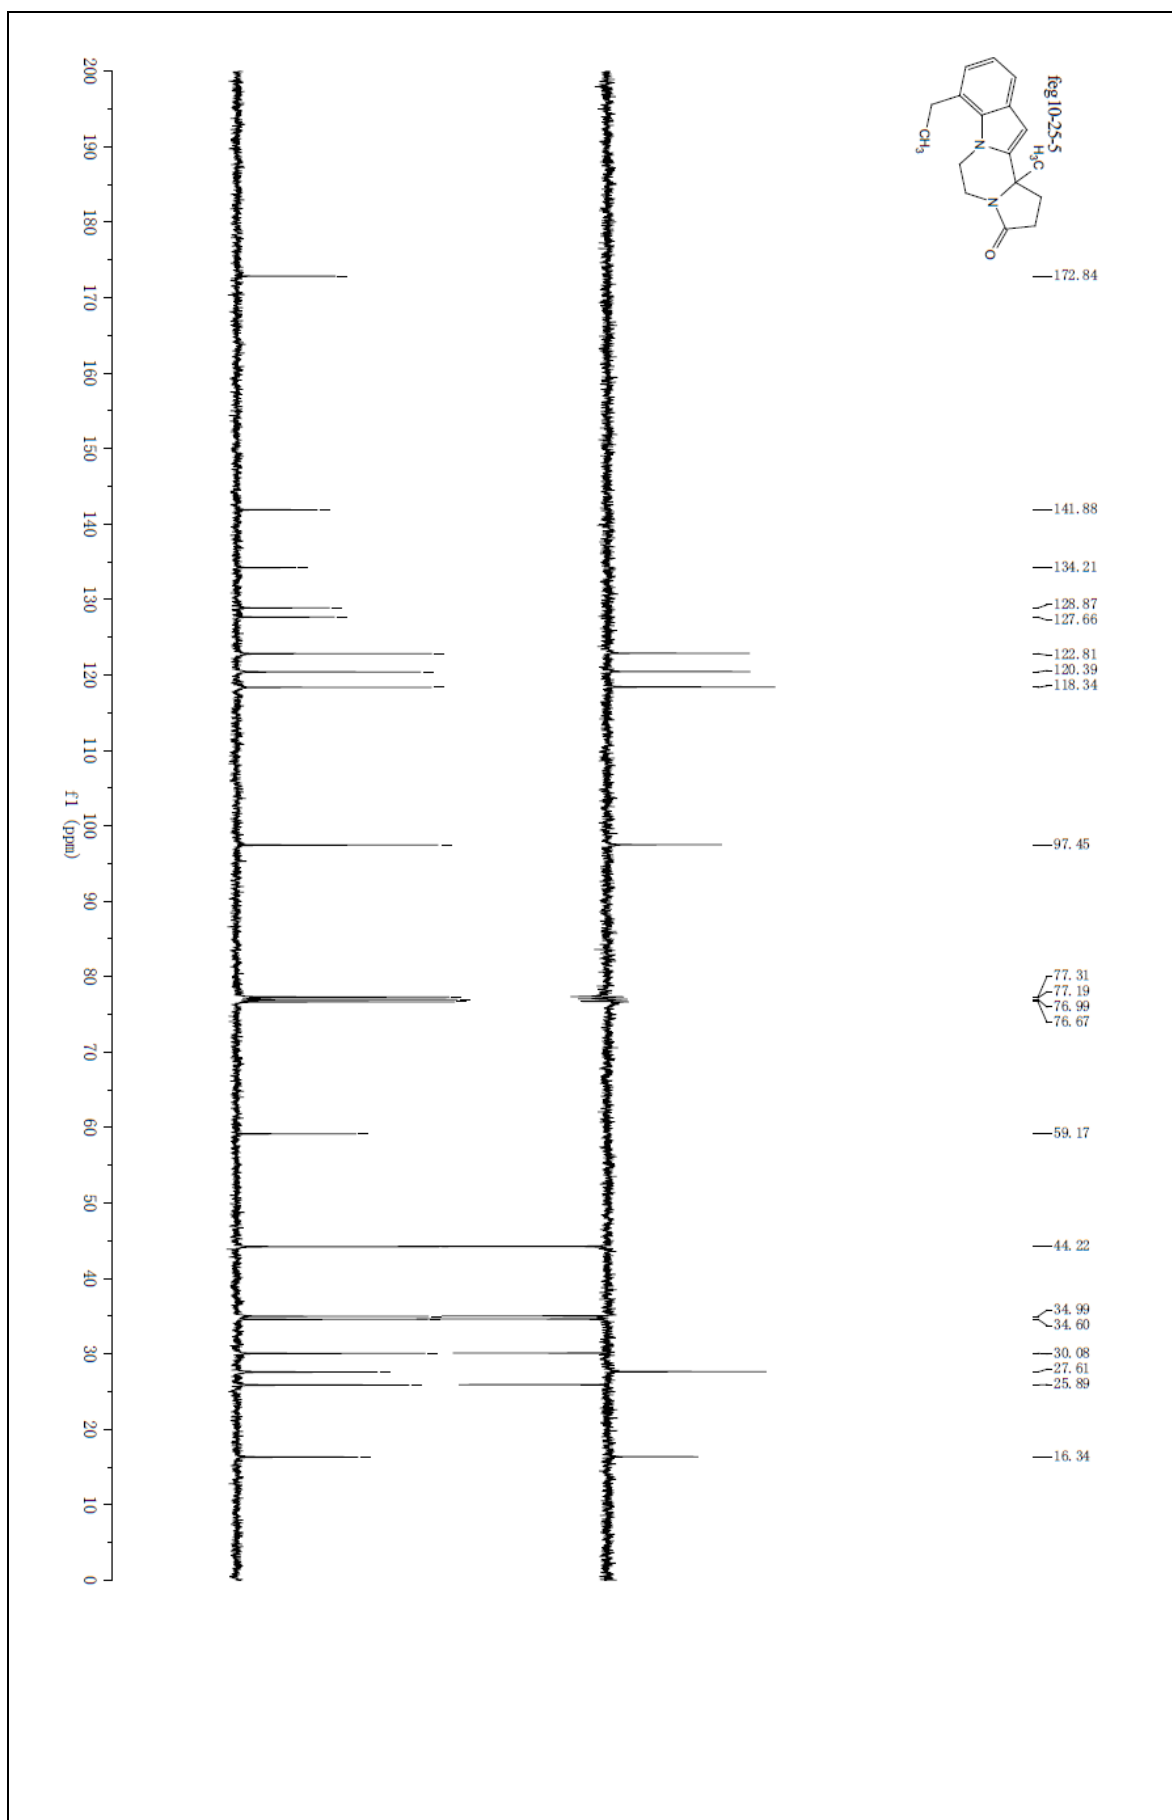

# Compound 3f

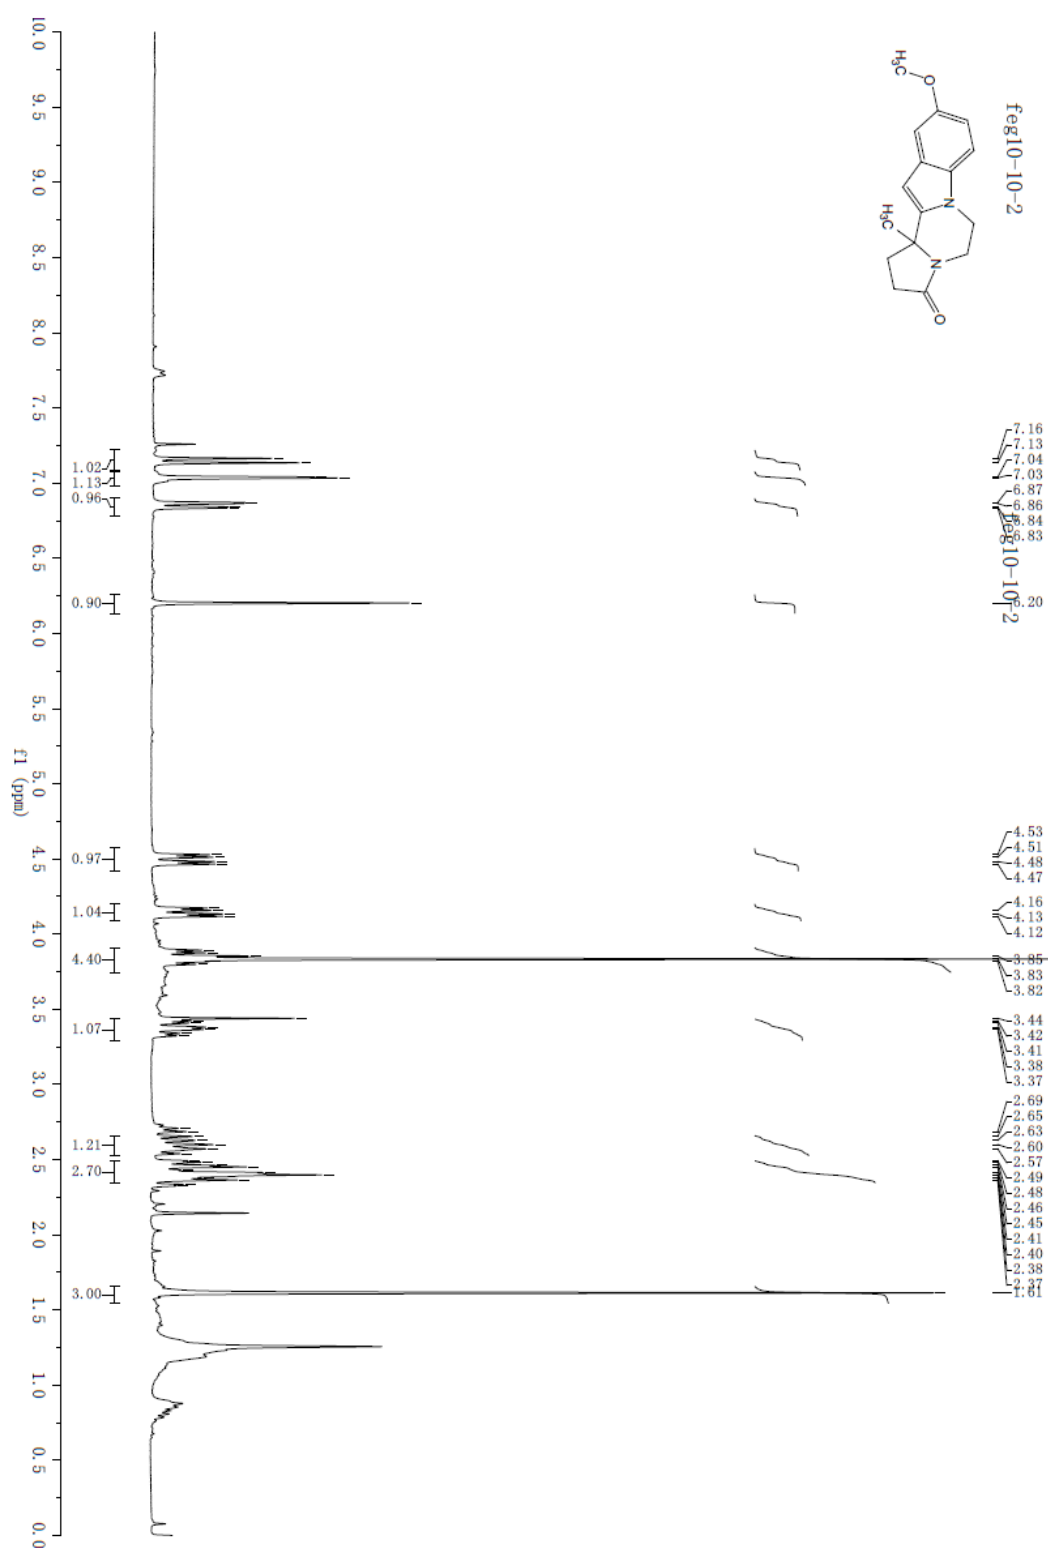

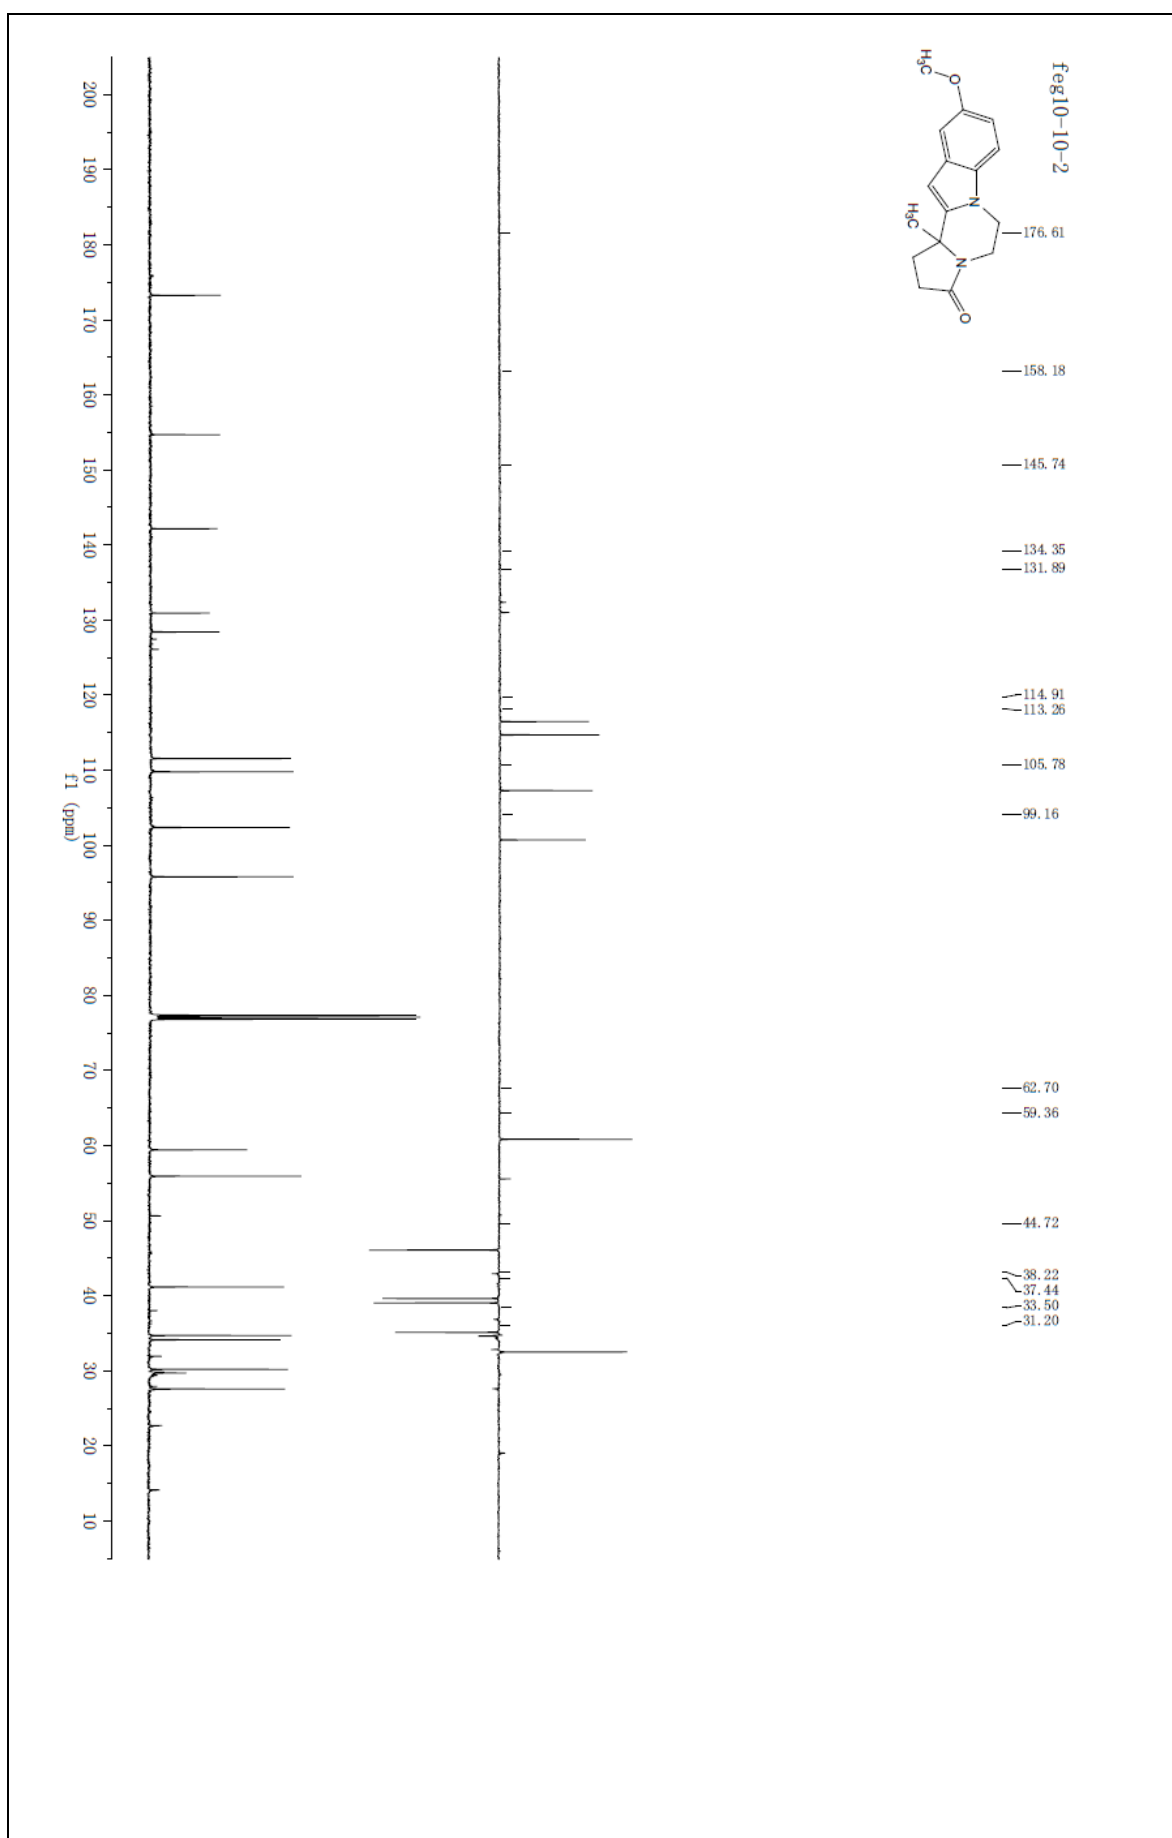

# Compound 3g

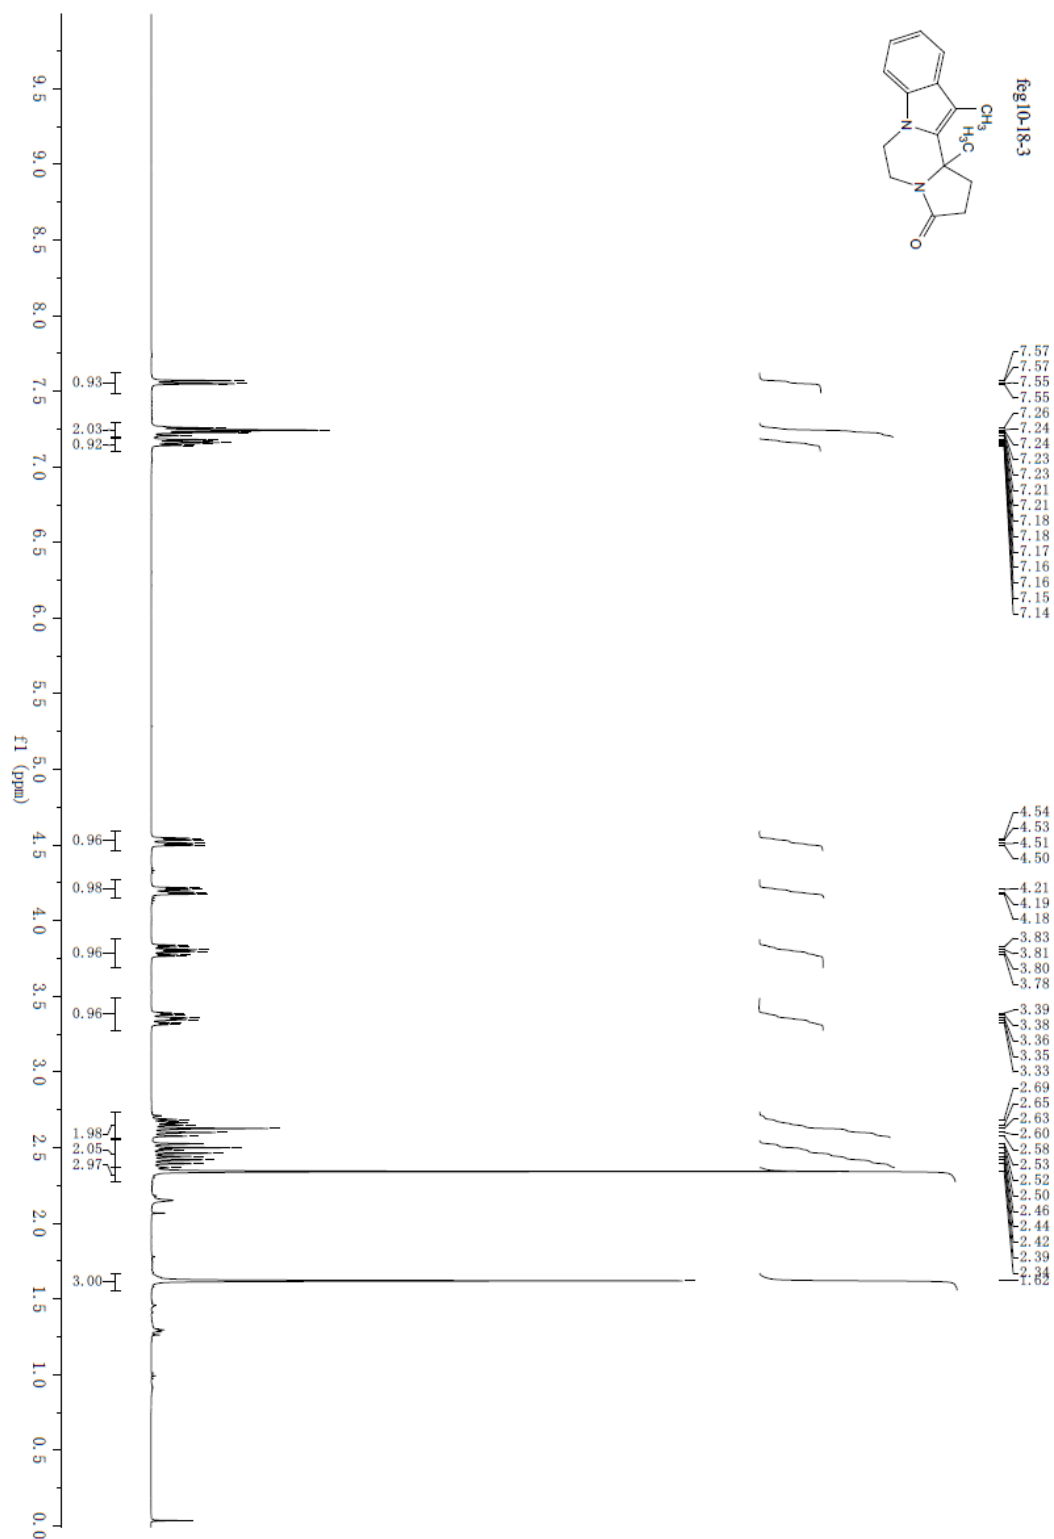



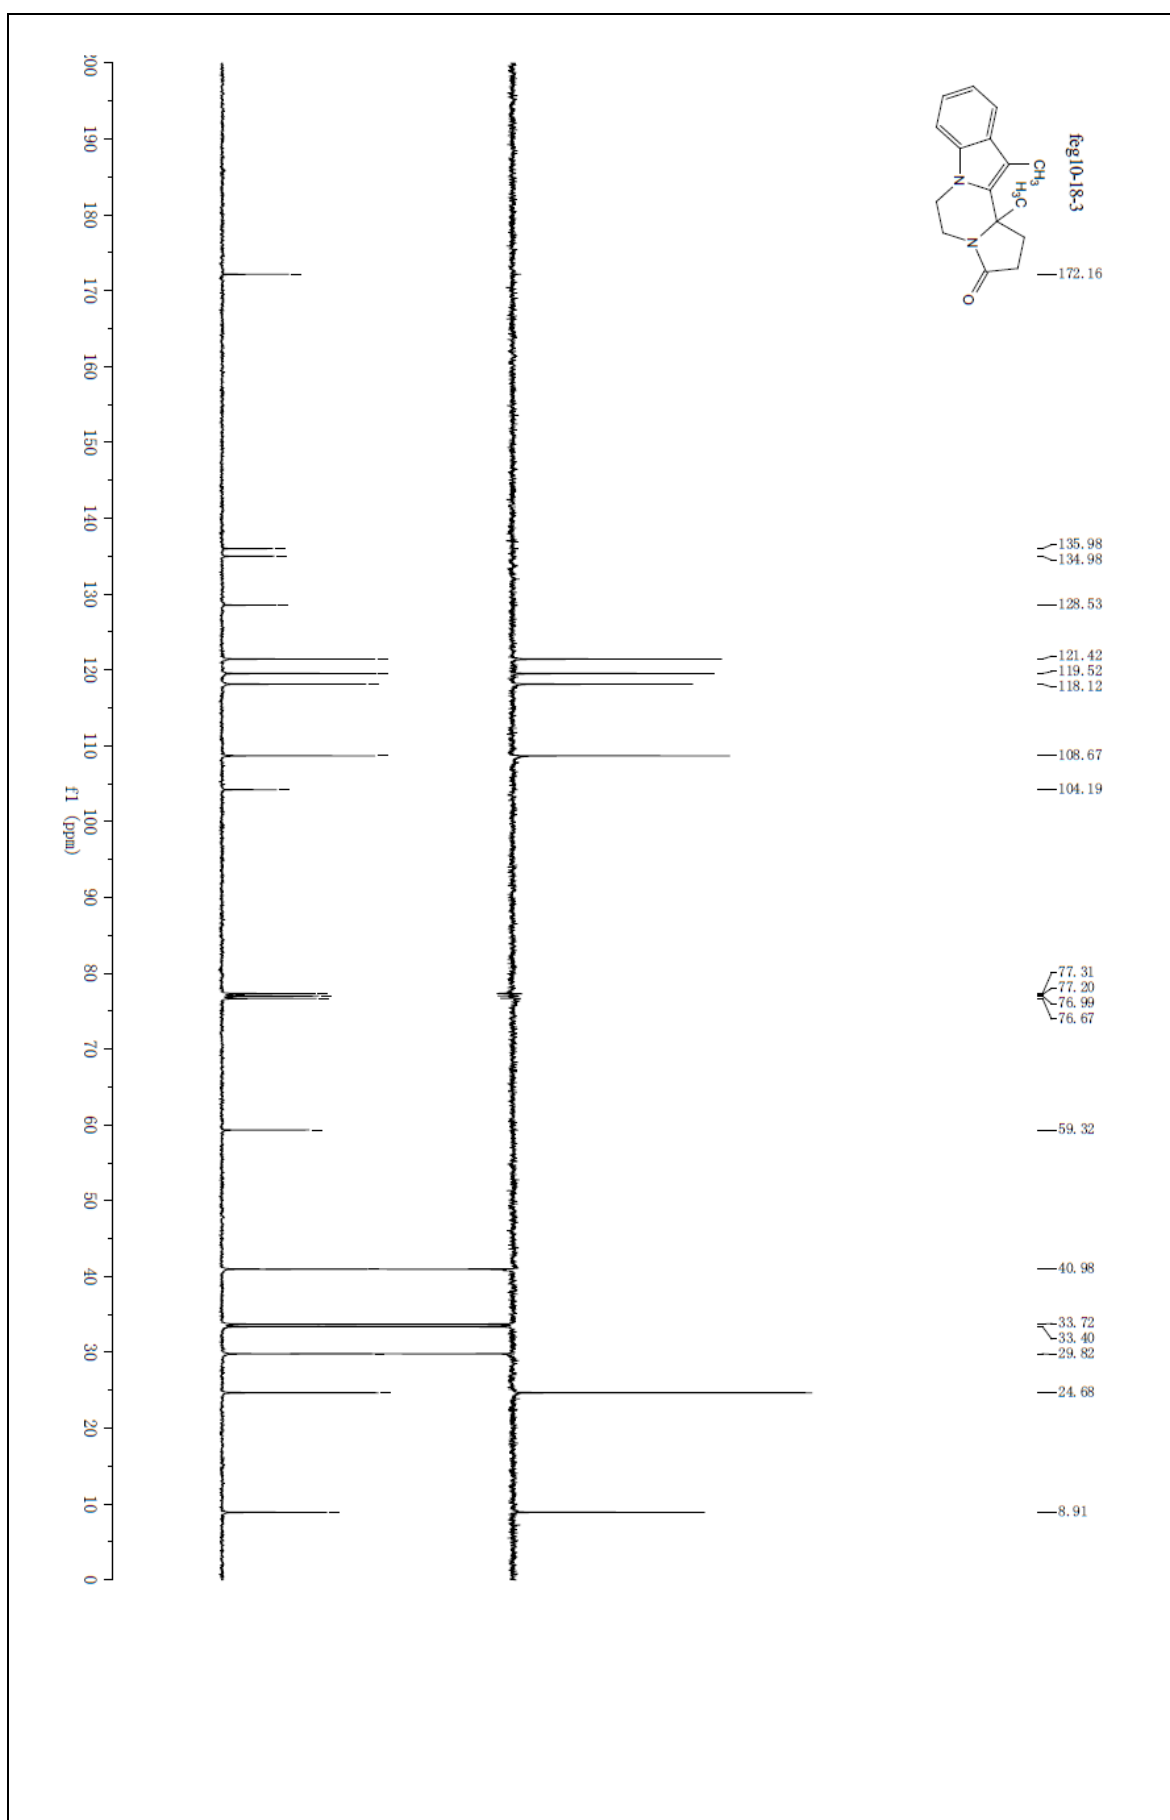

# Compound 3h

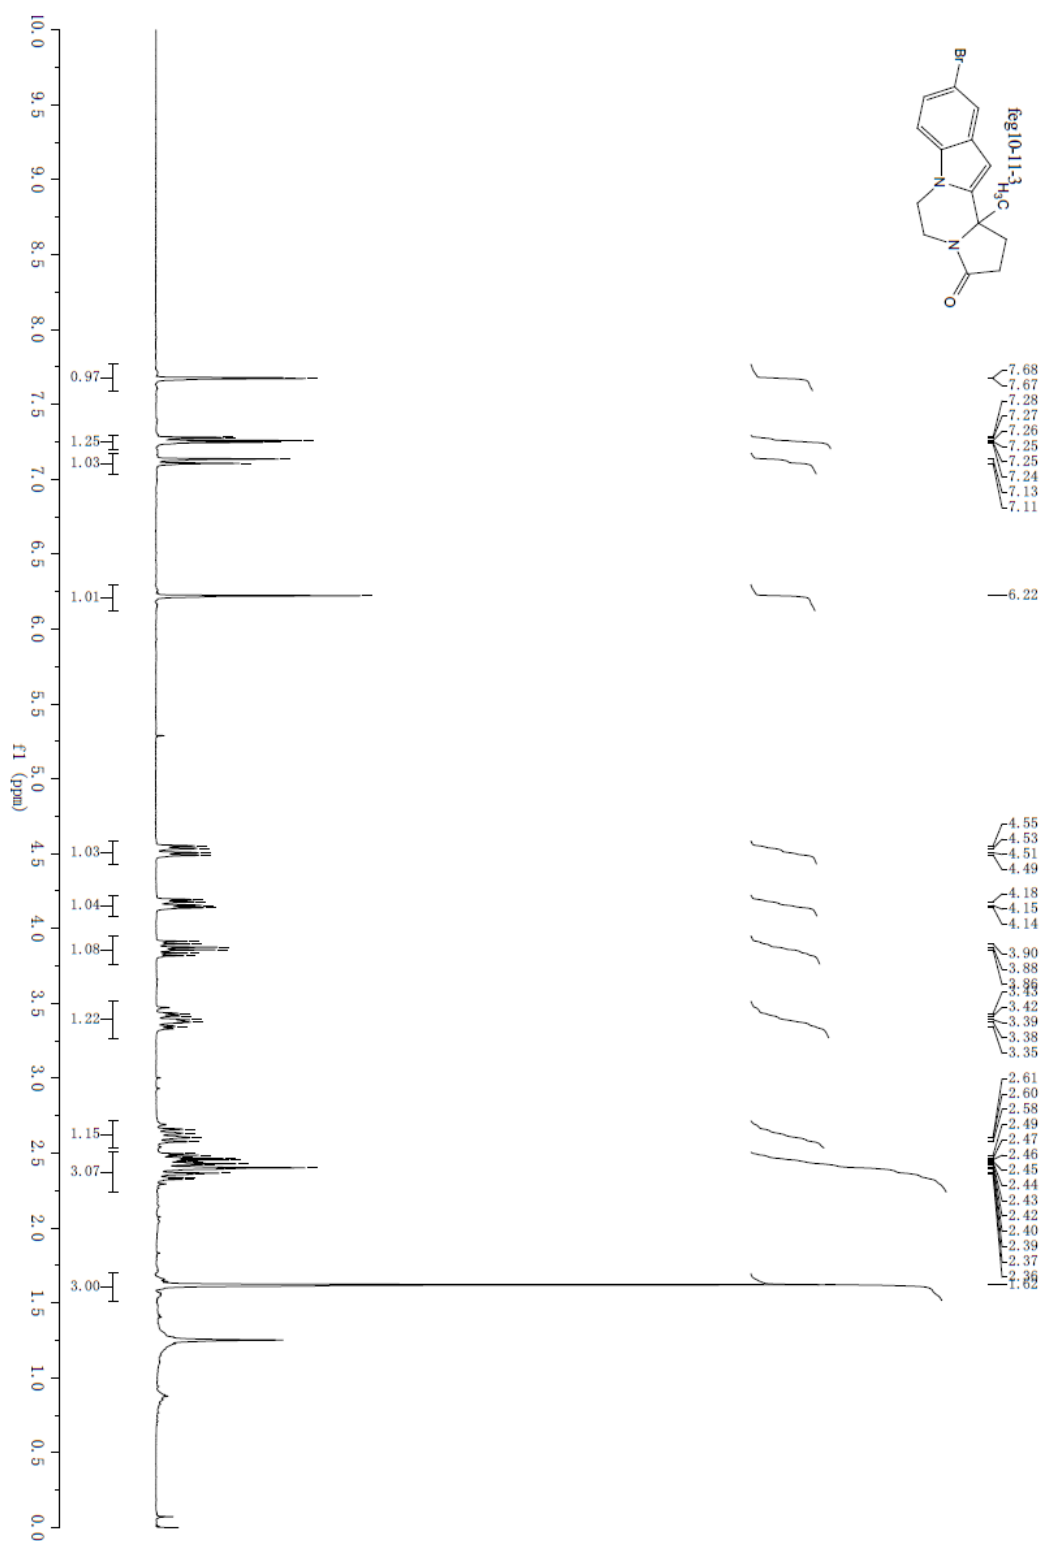

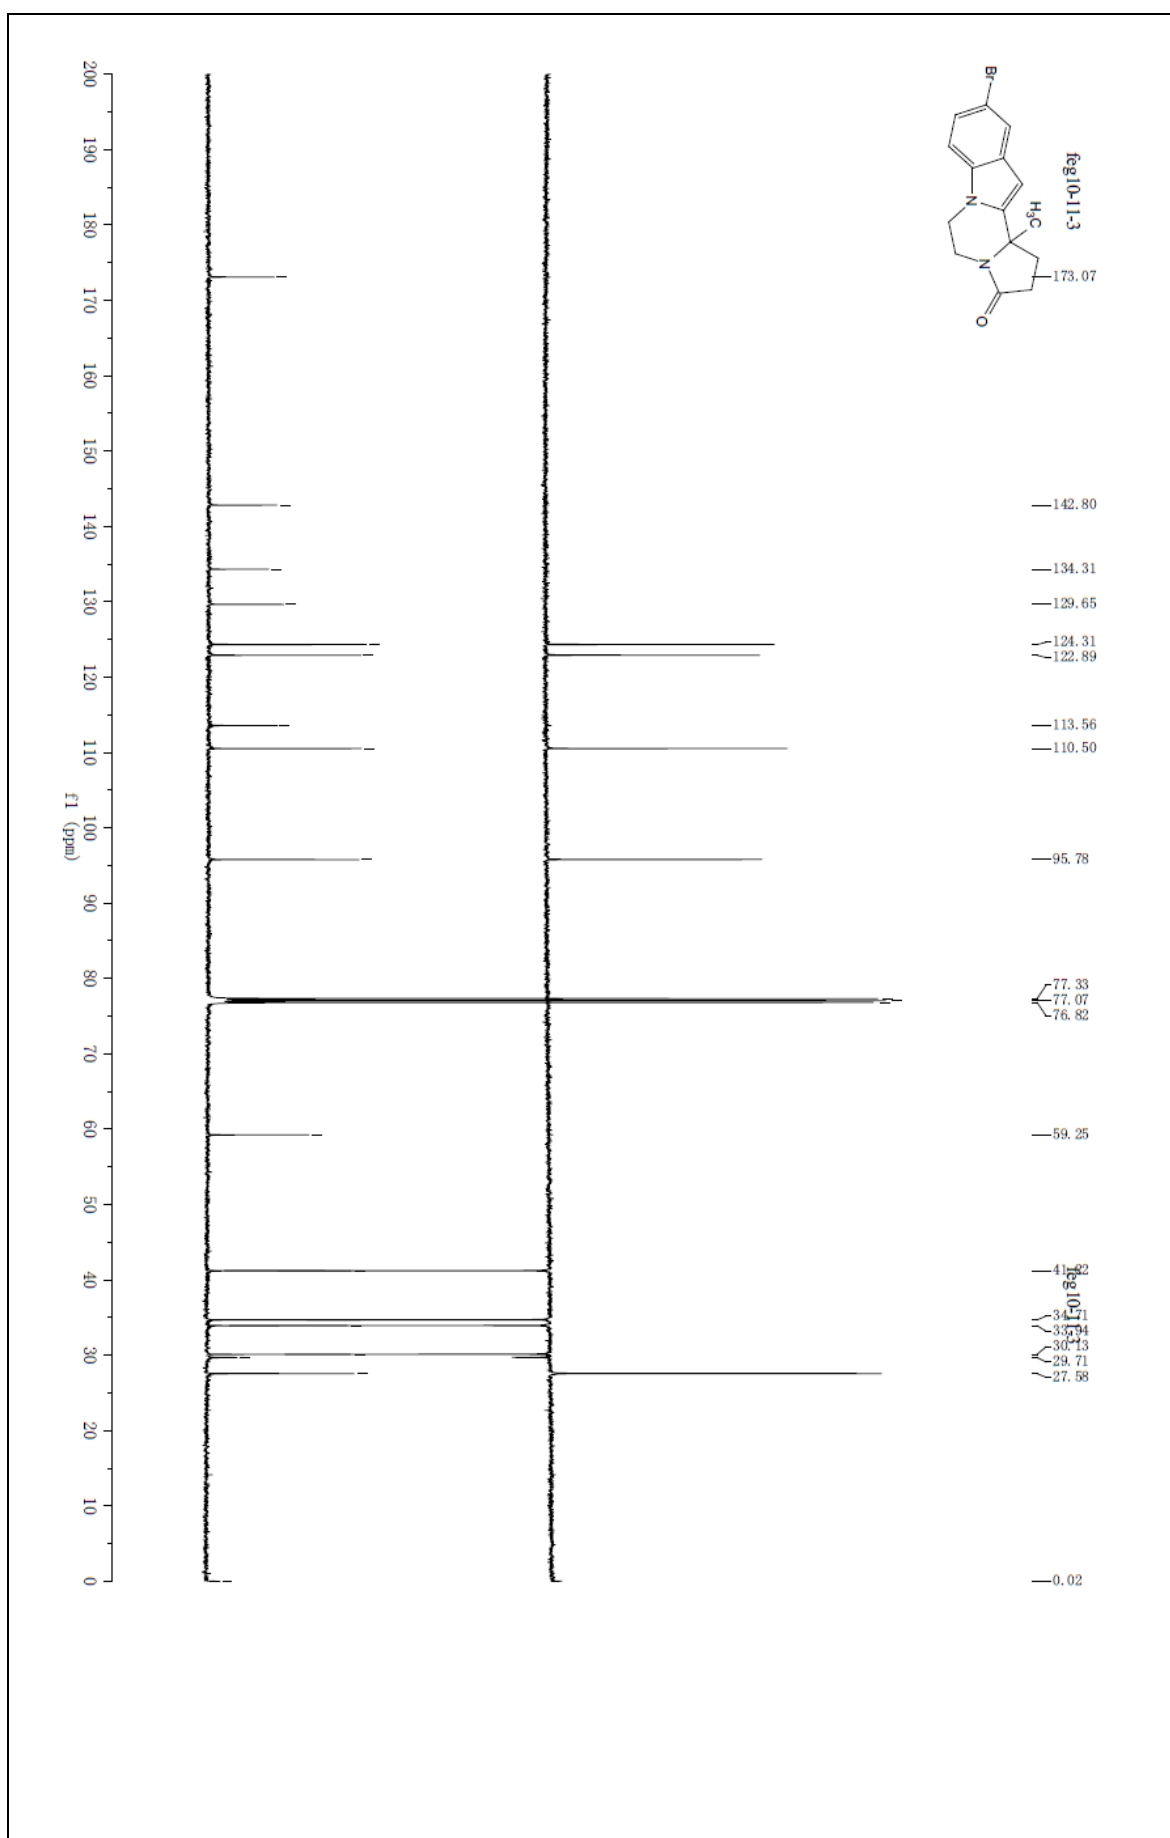

# Compound 3i

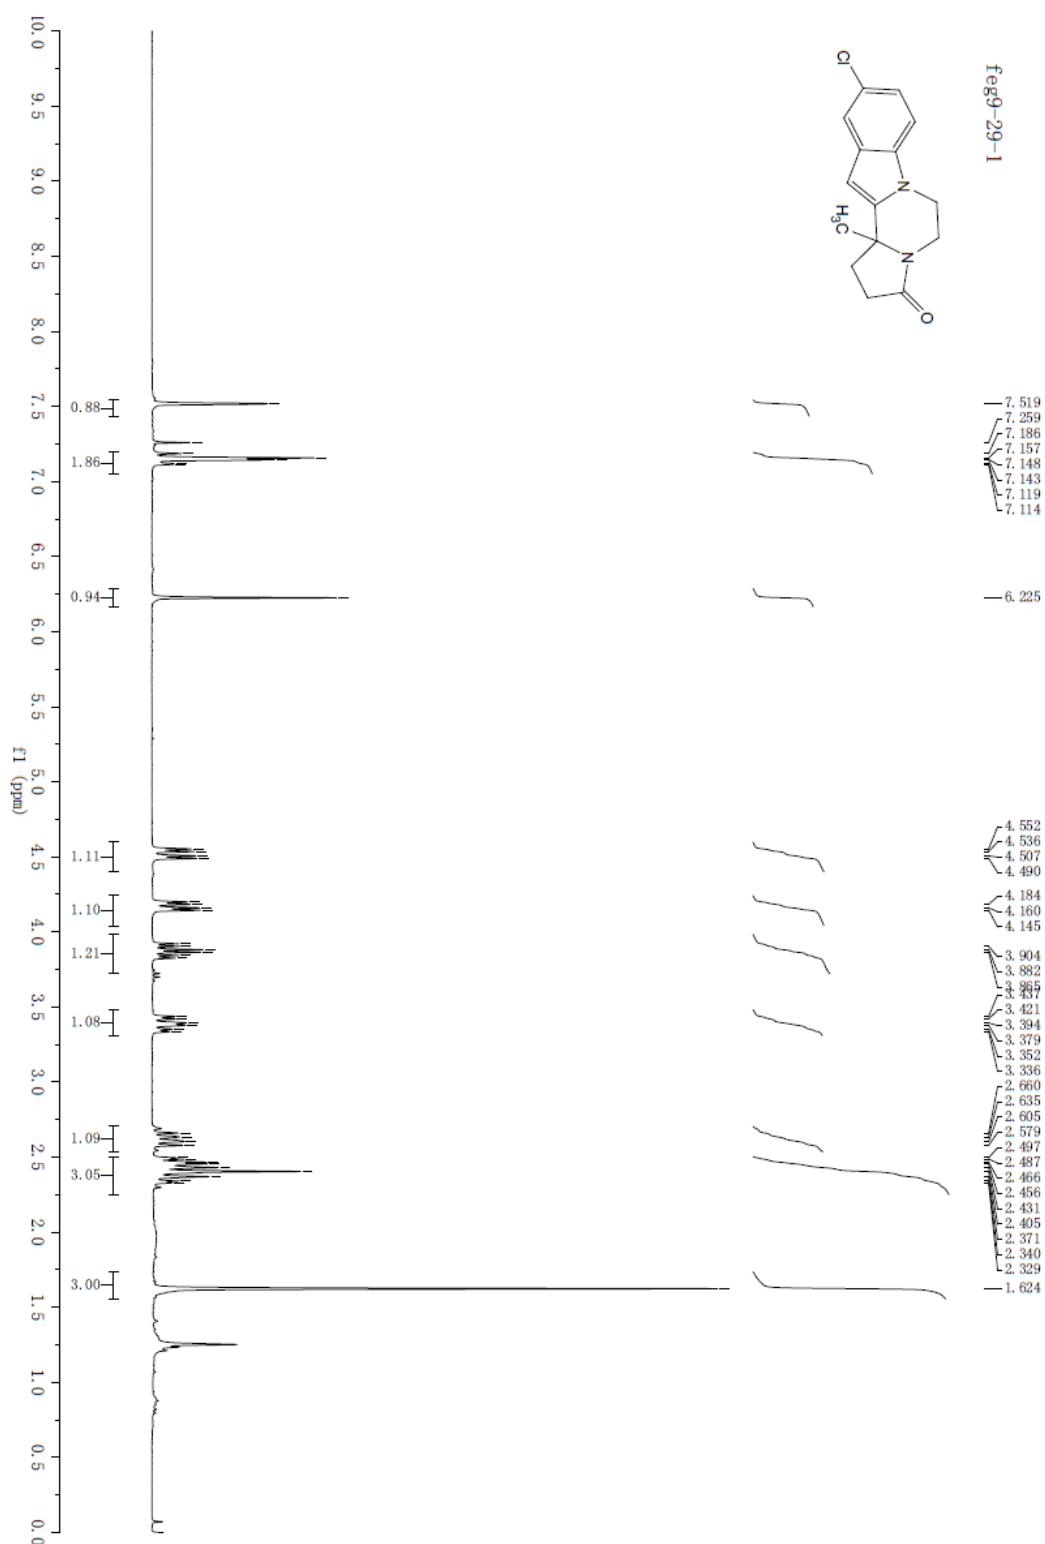

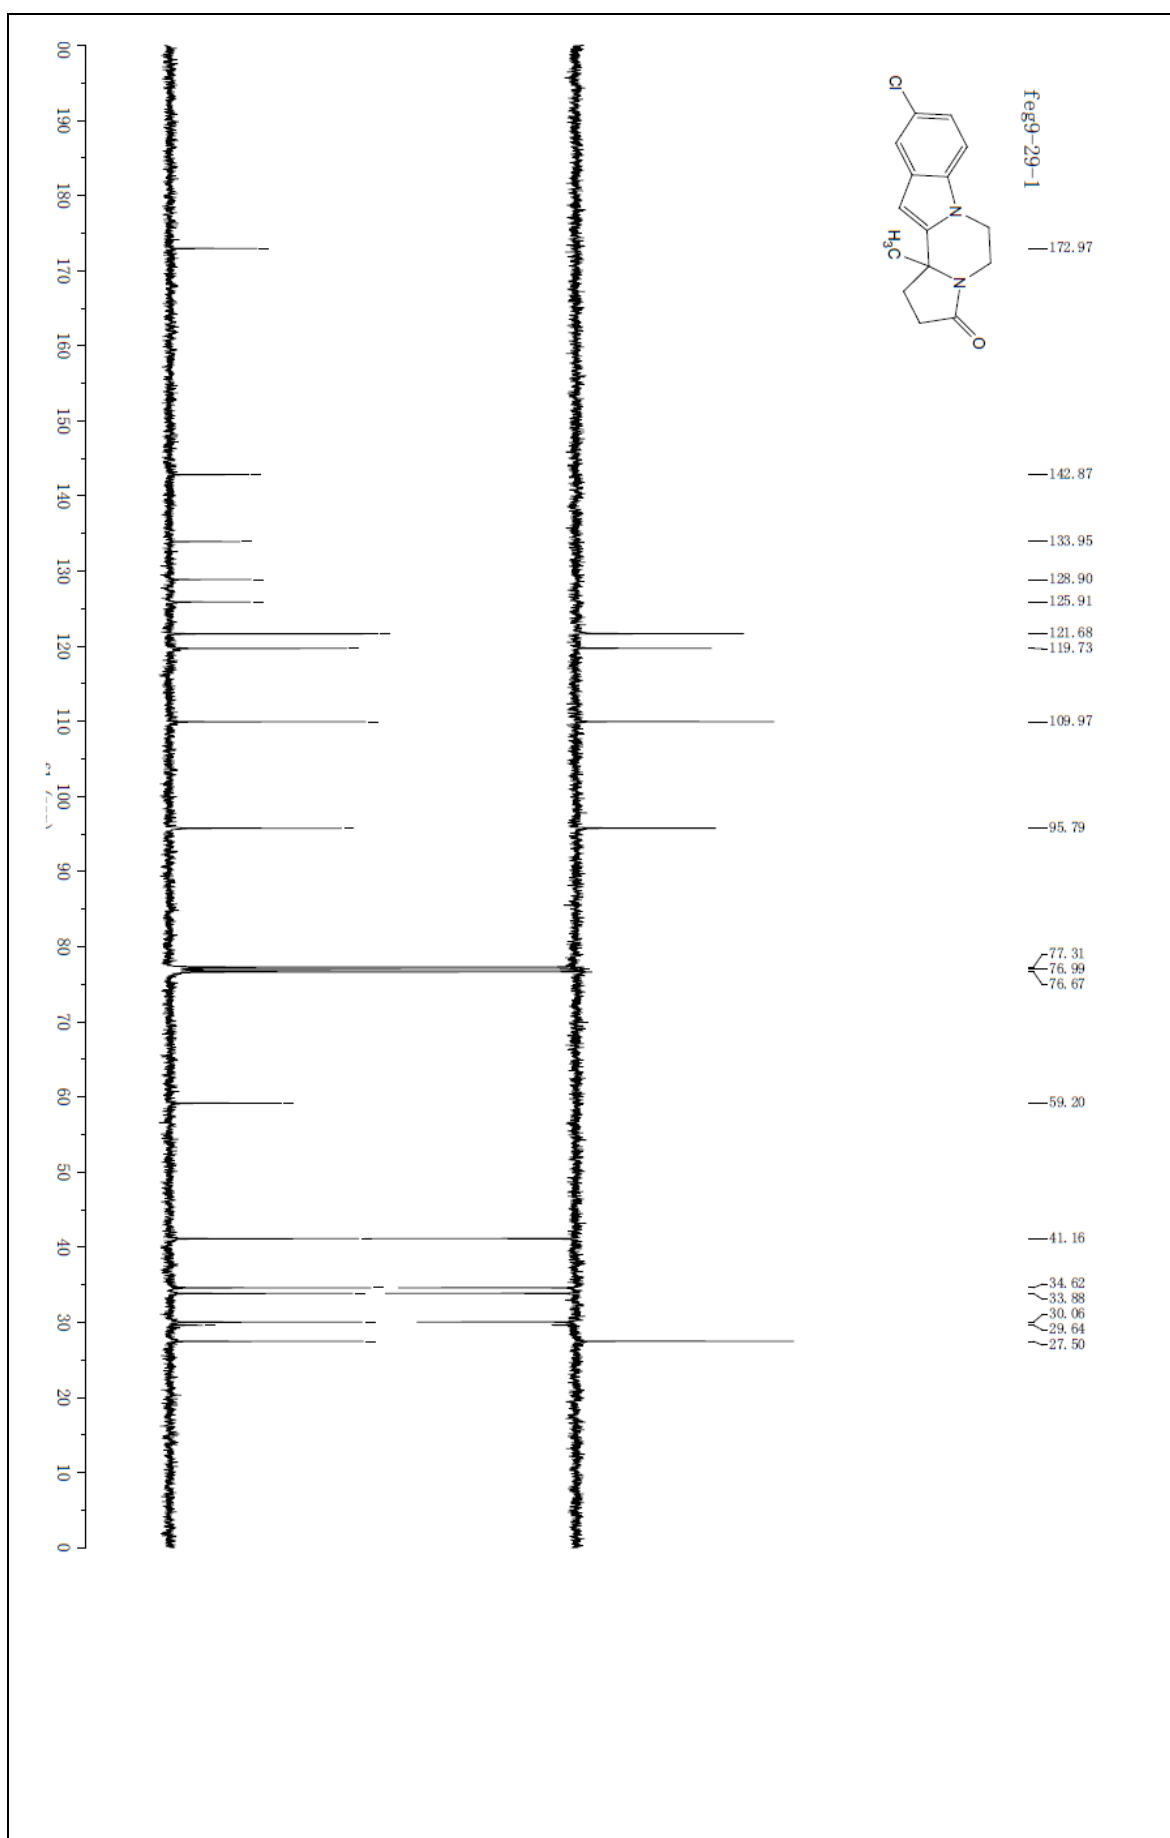

# Compound 3j

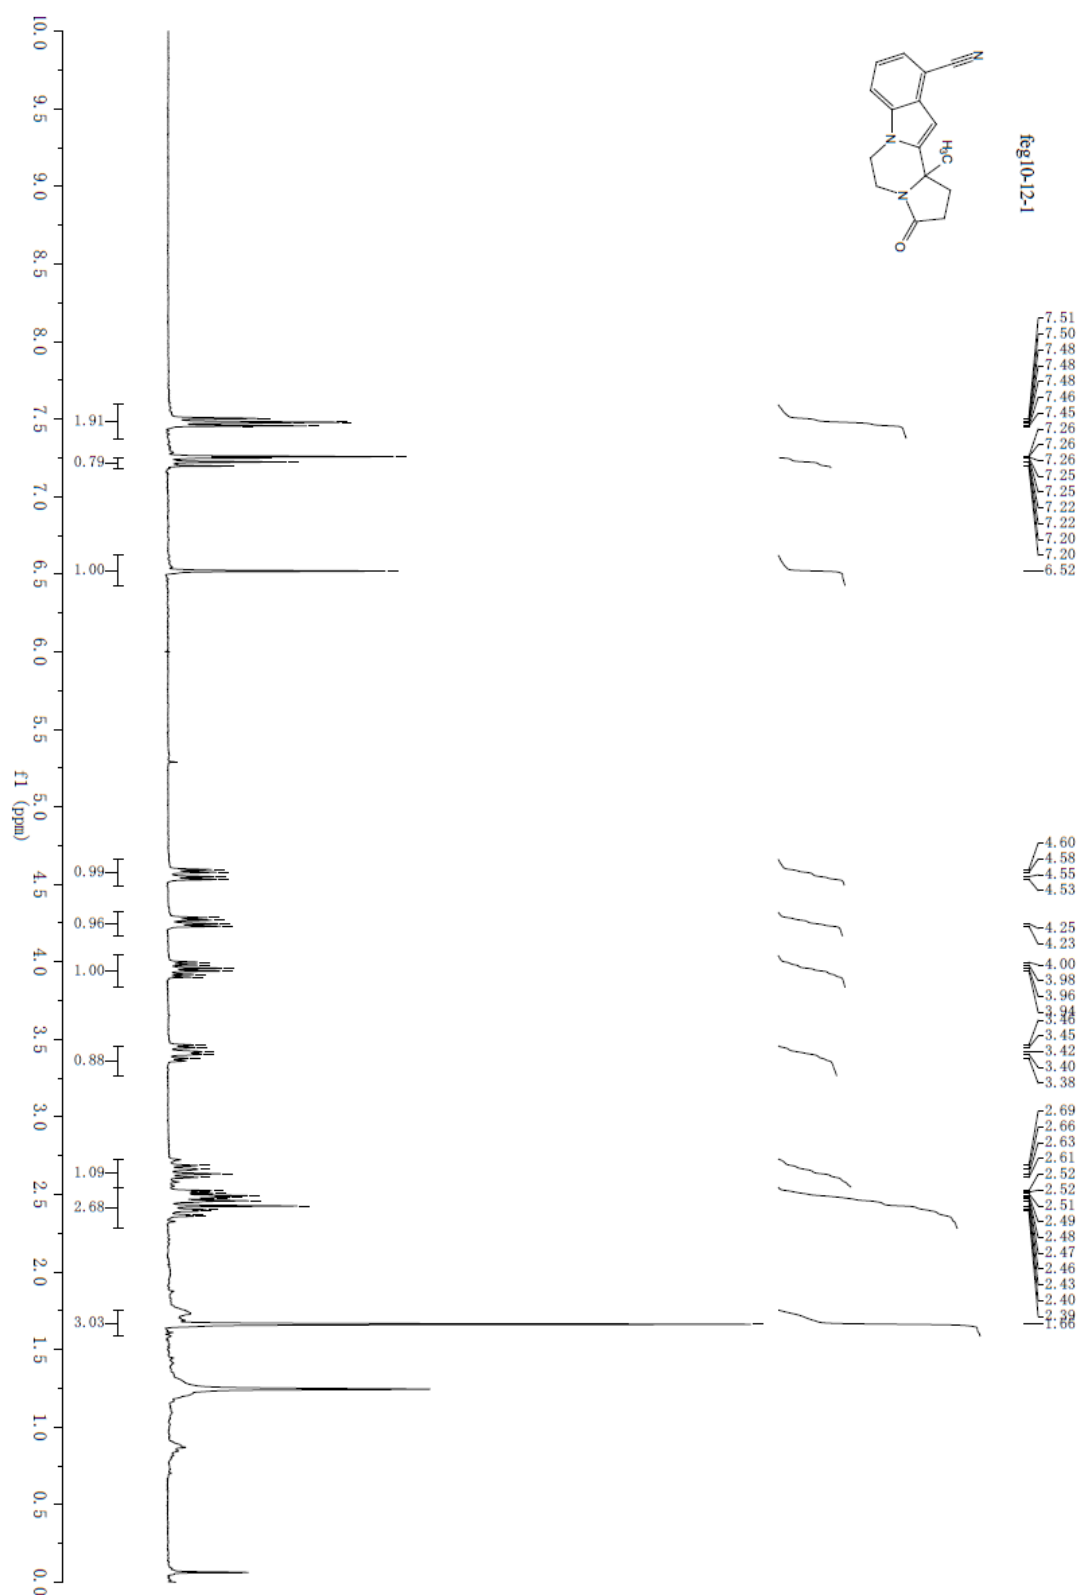

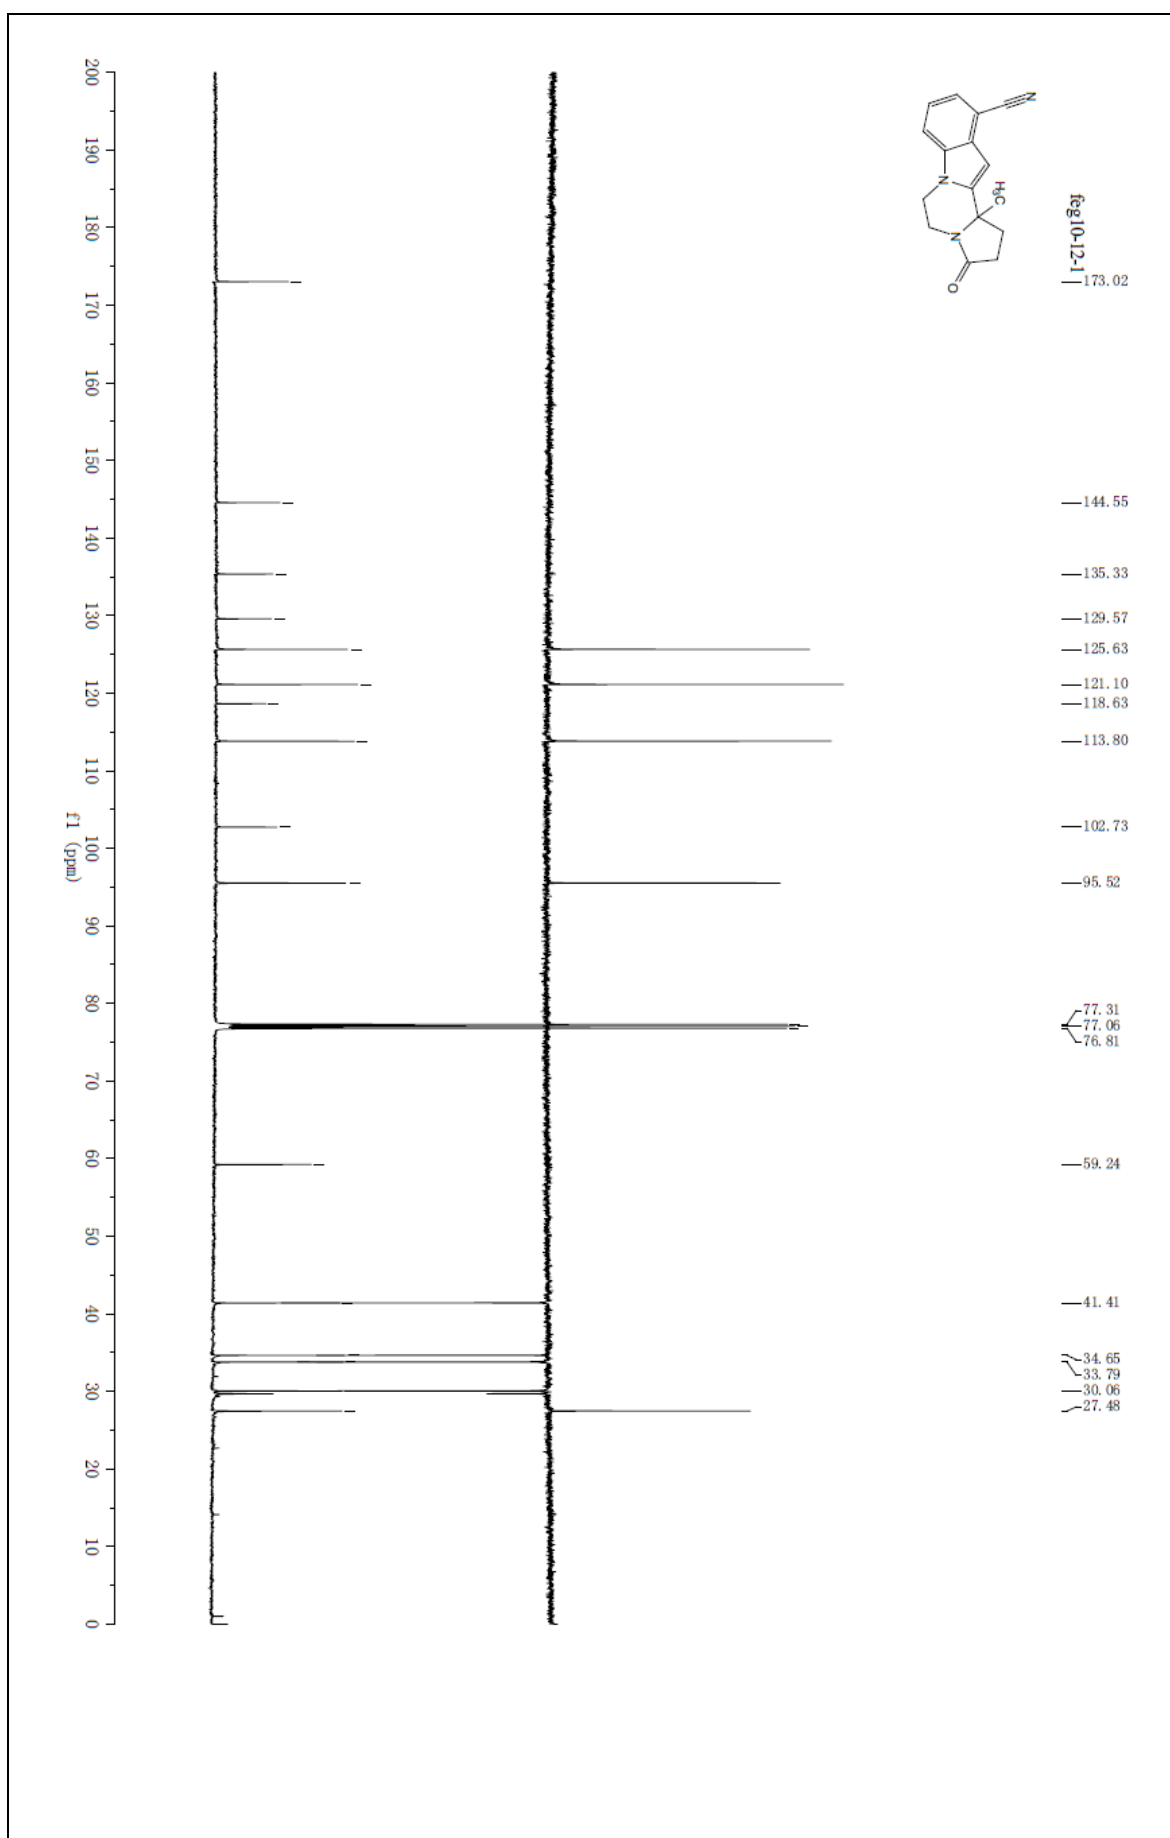

# Compound 3k

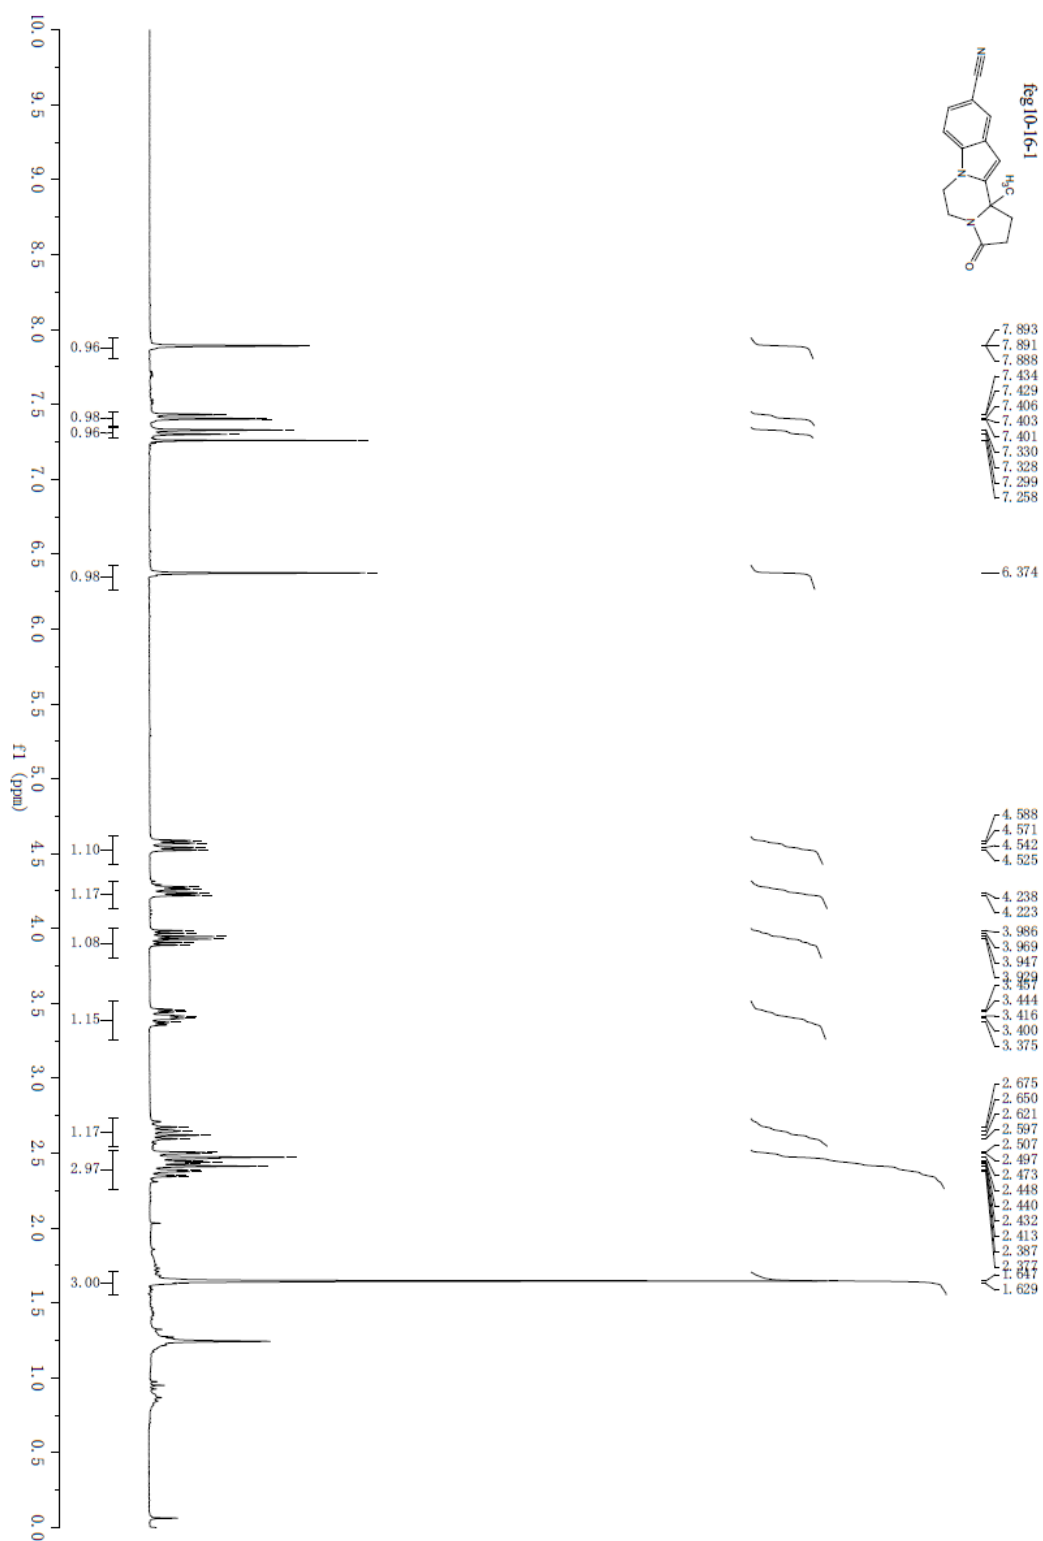



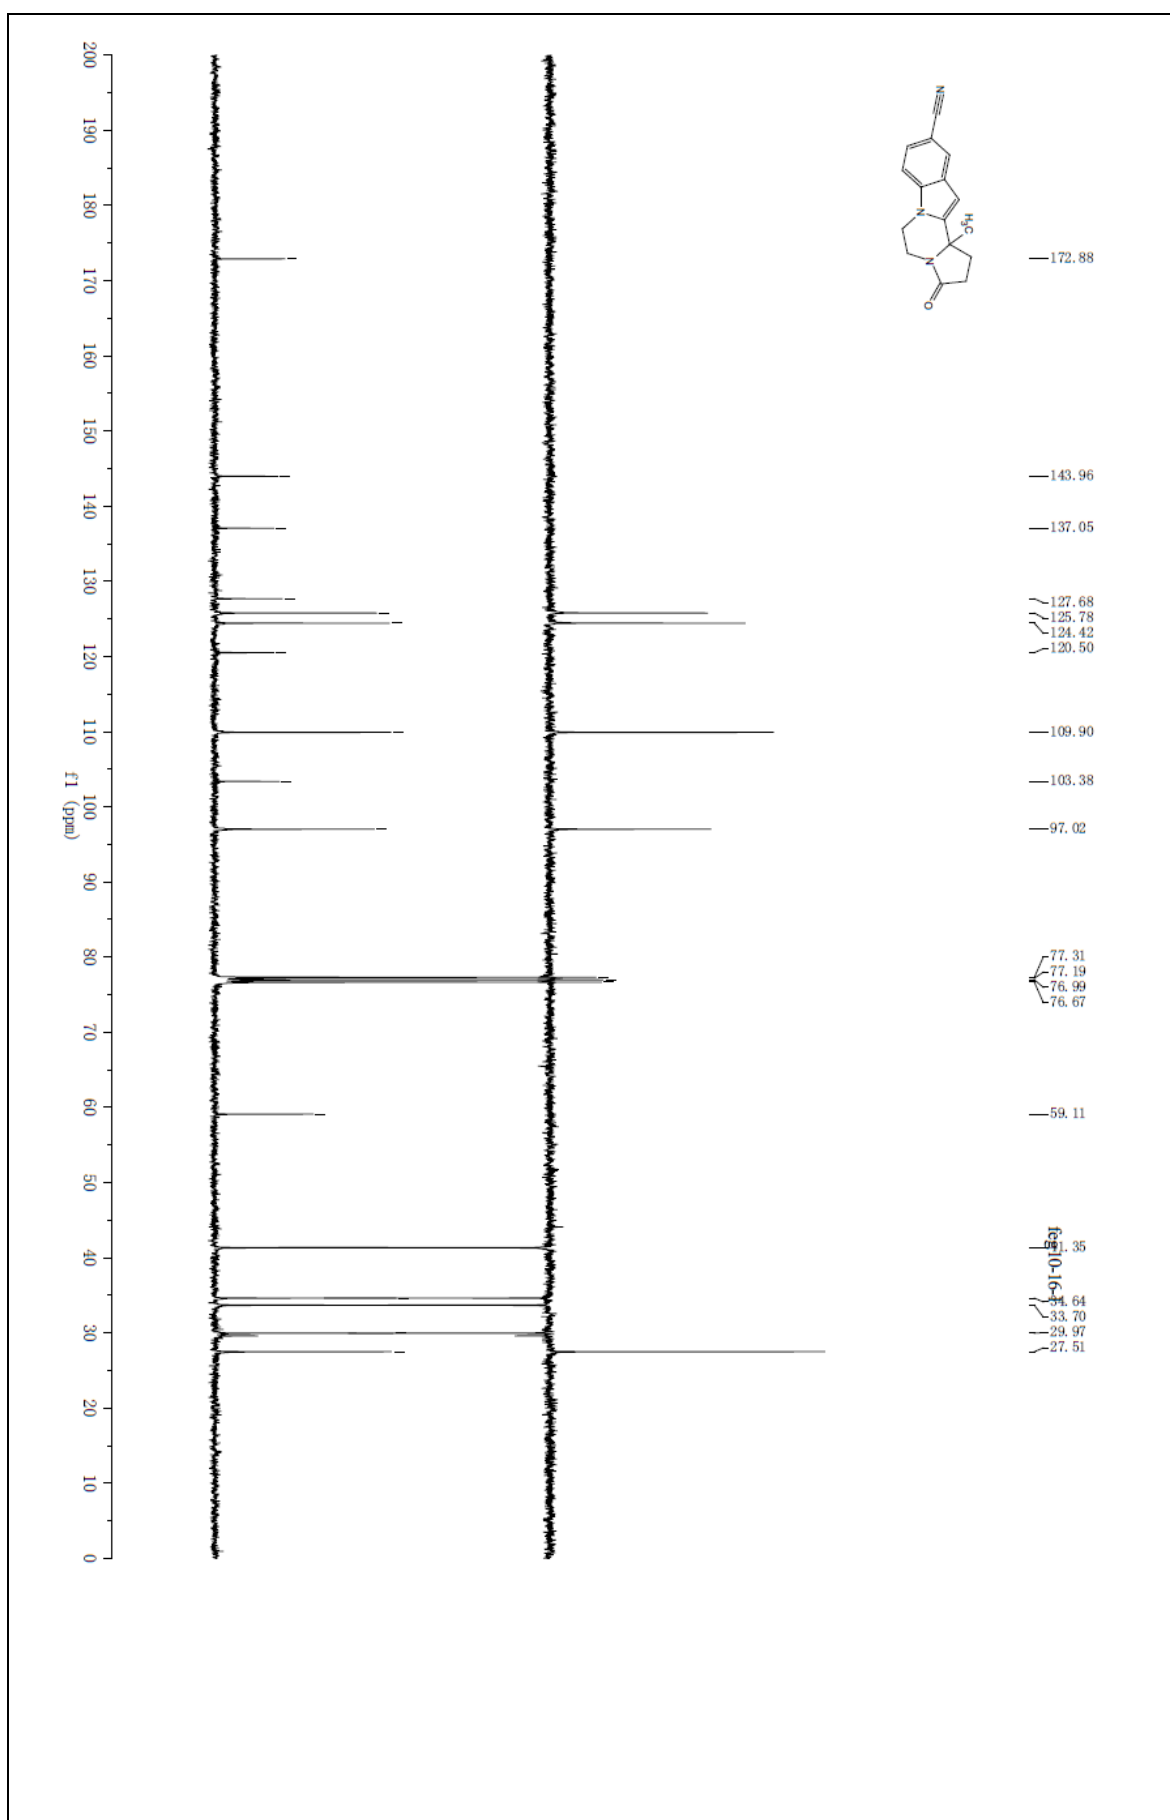

# Compound 3l

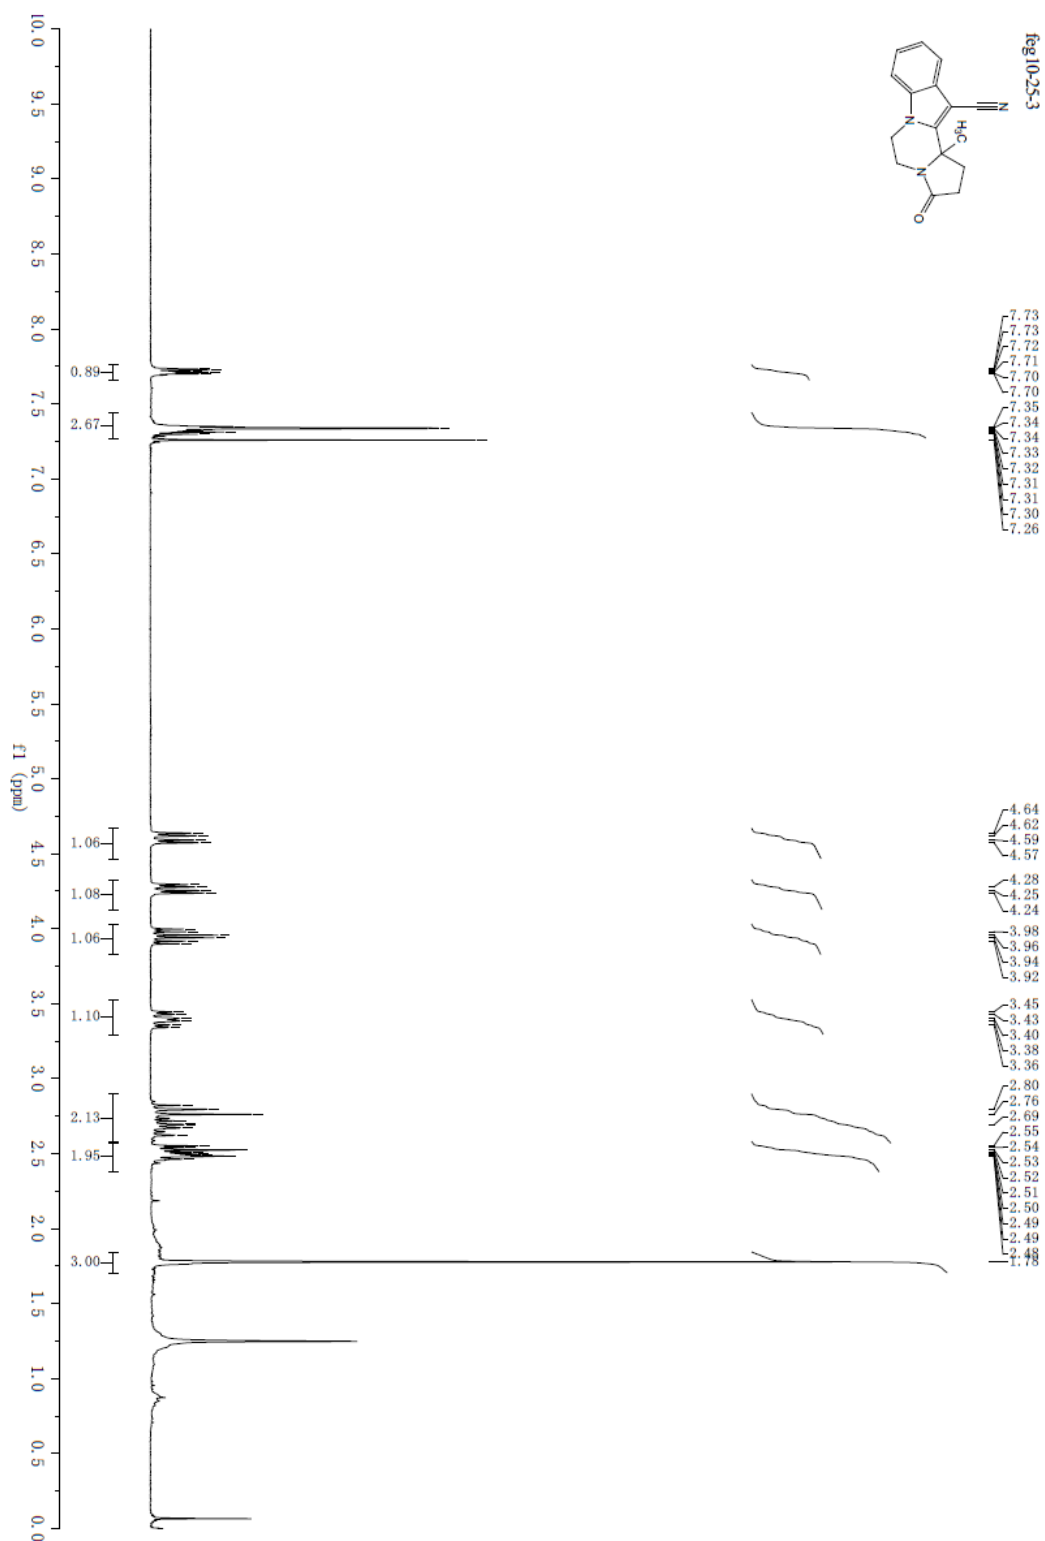

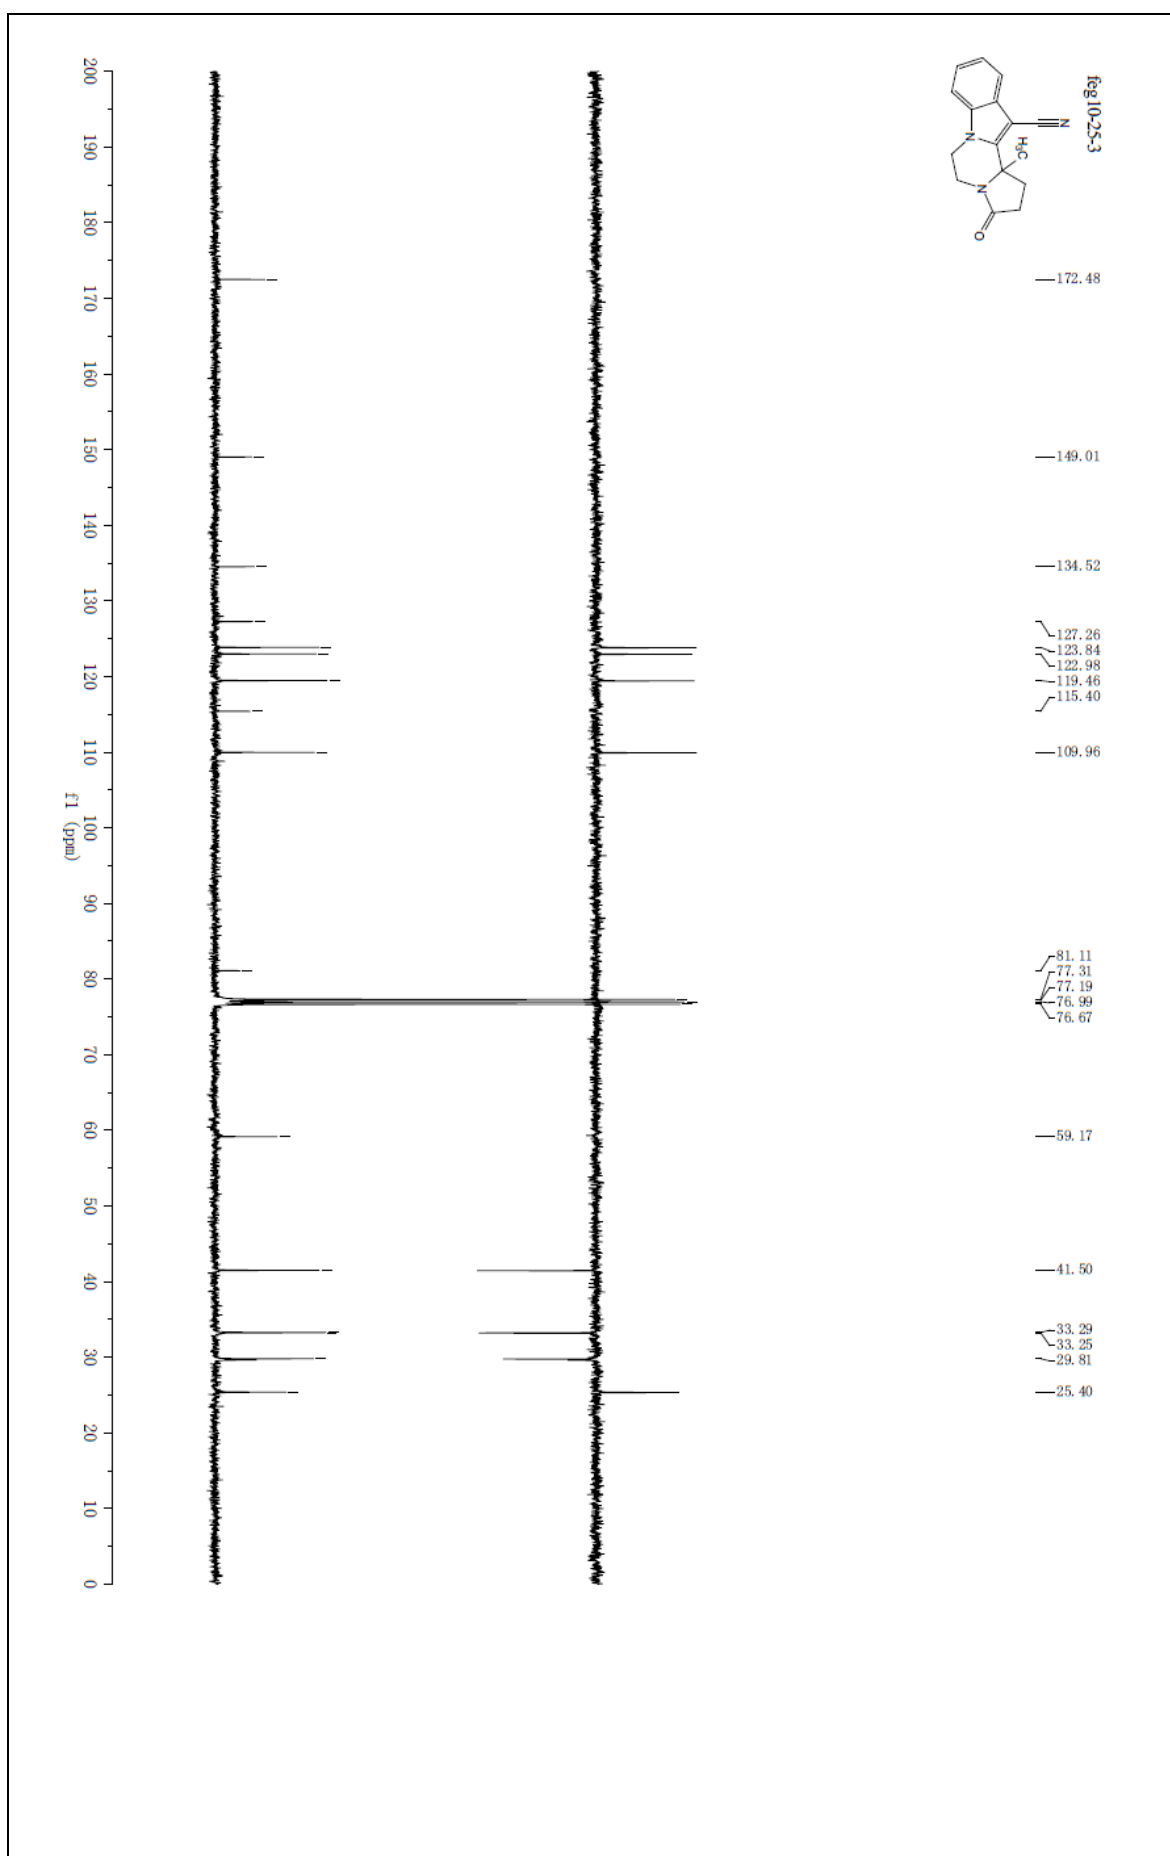

# Compound 3m

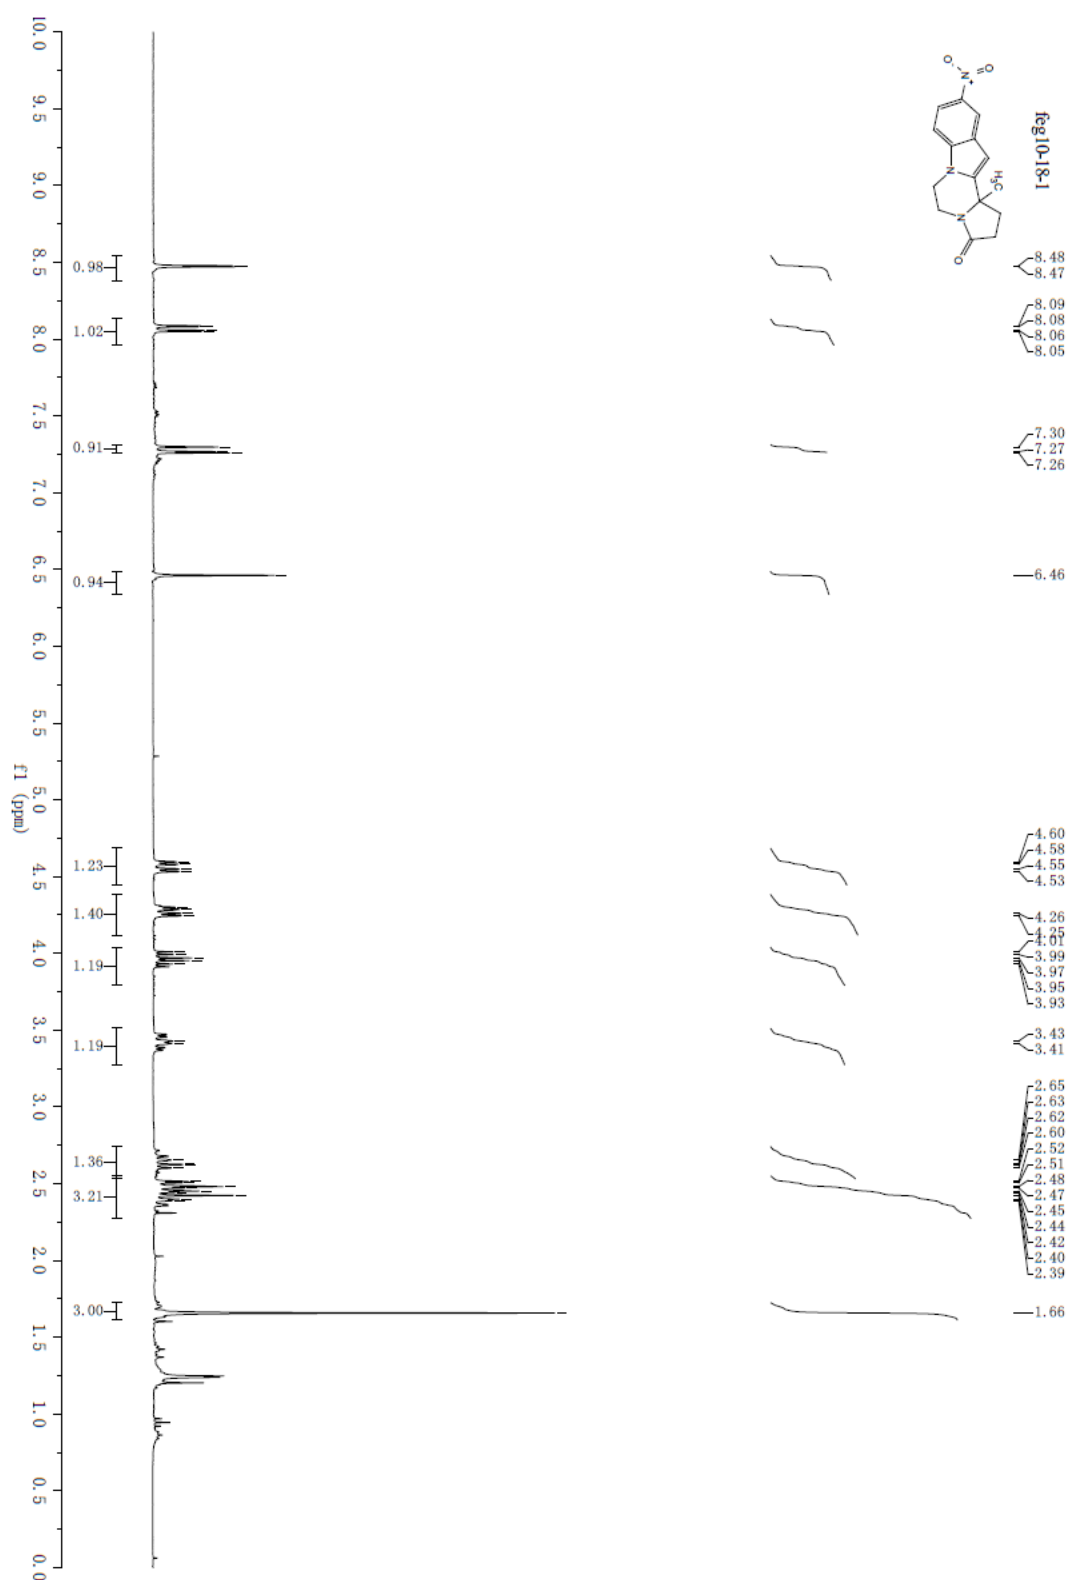

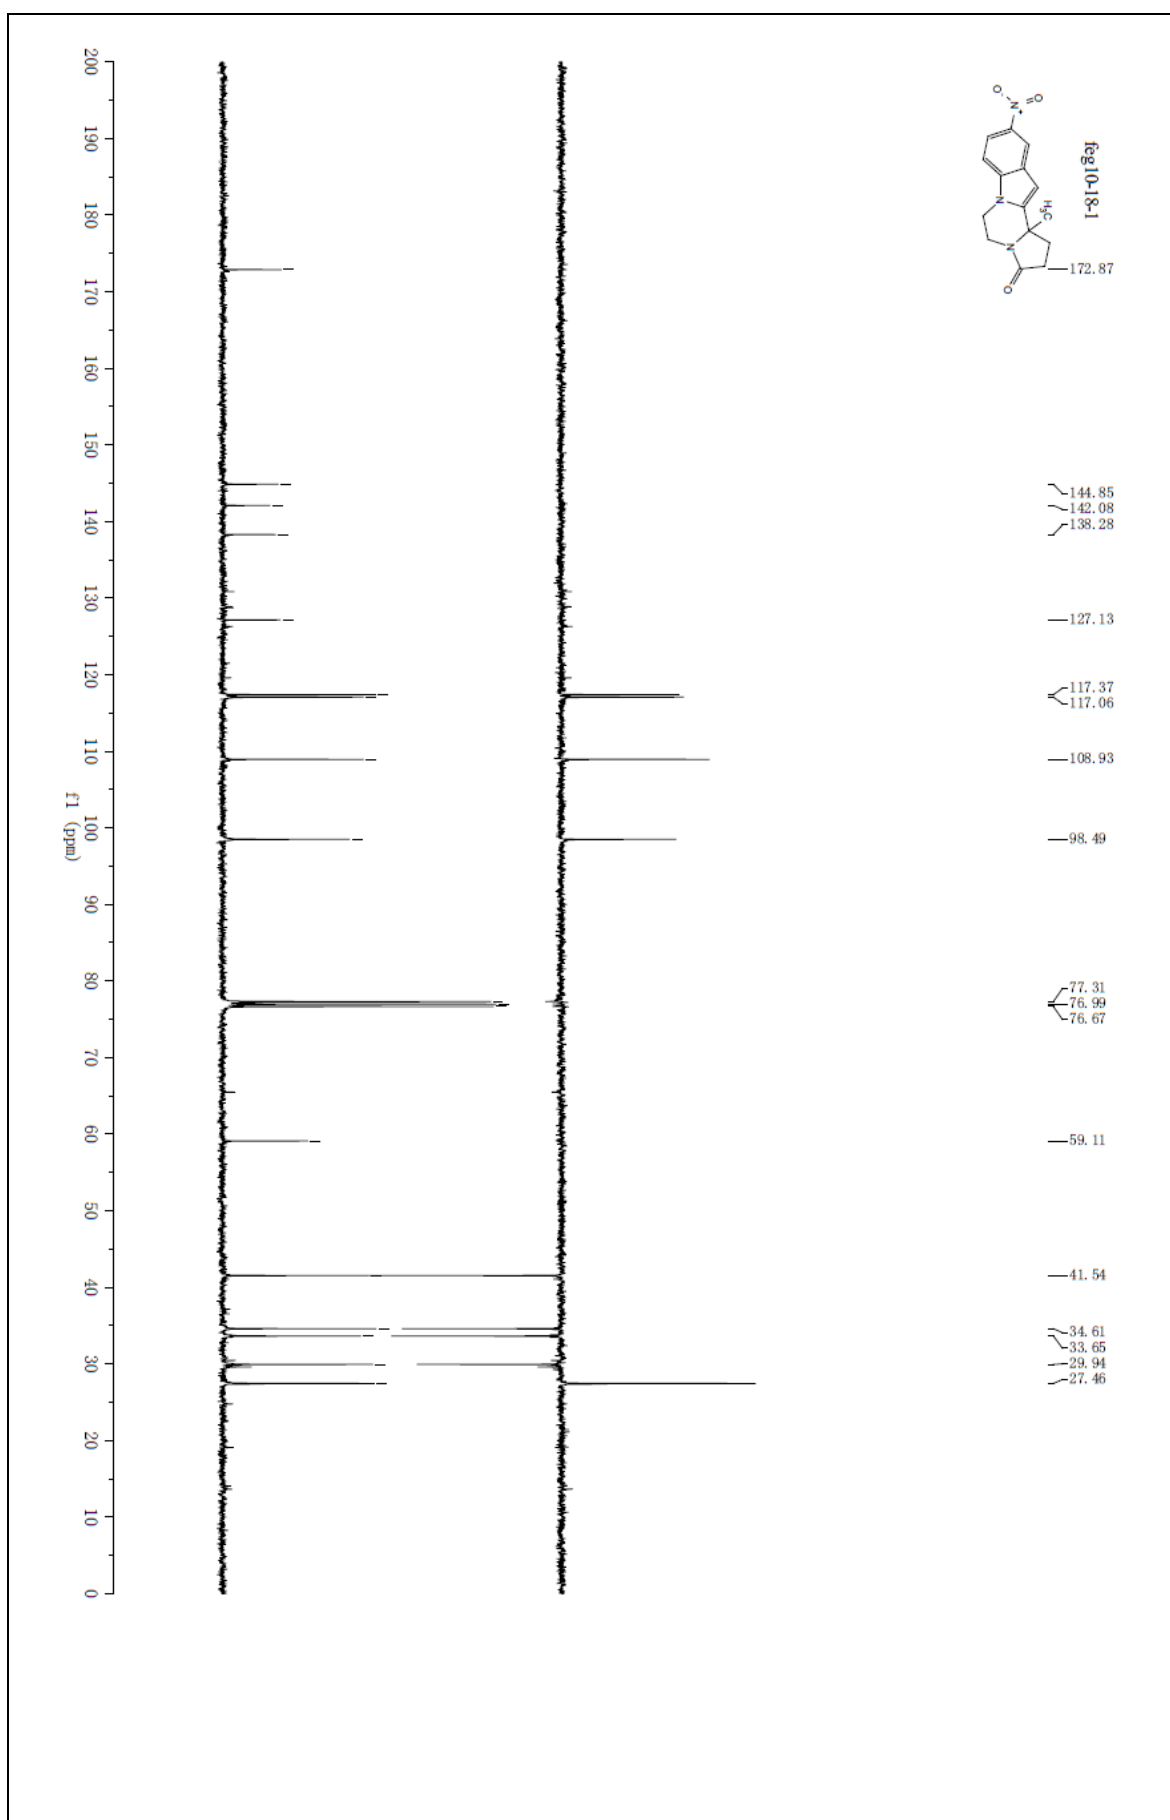

# Compound 3n

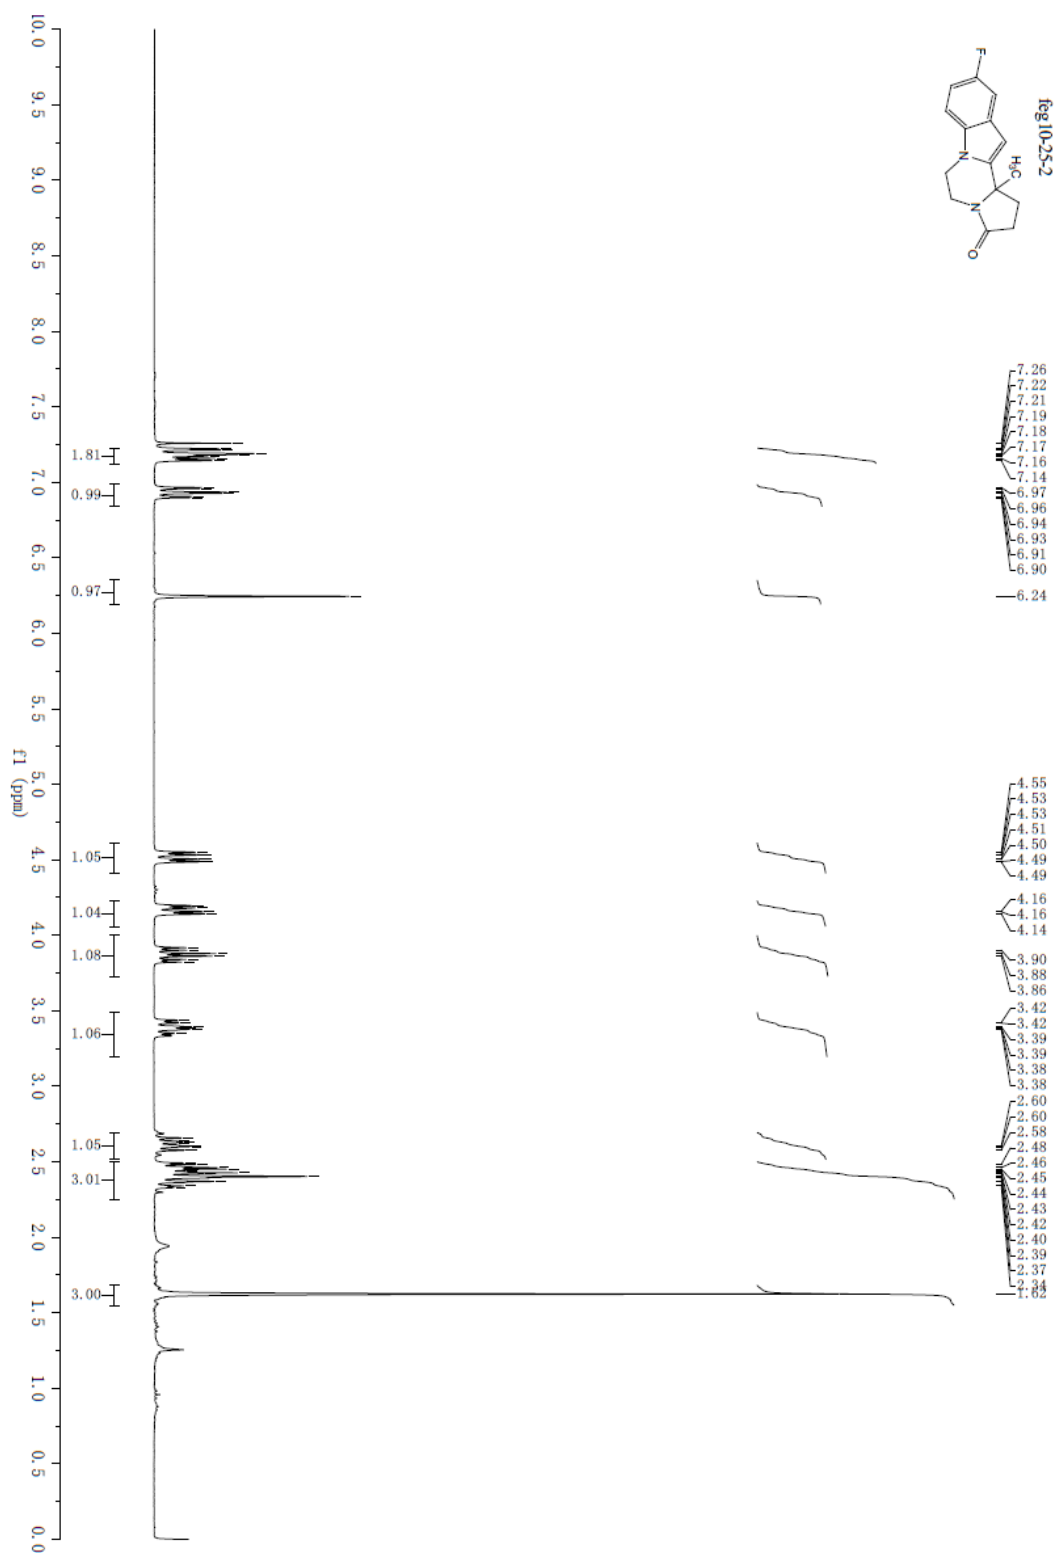

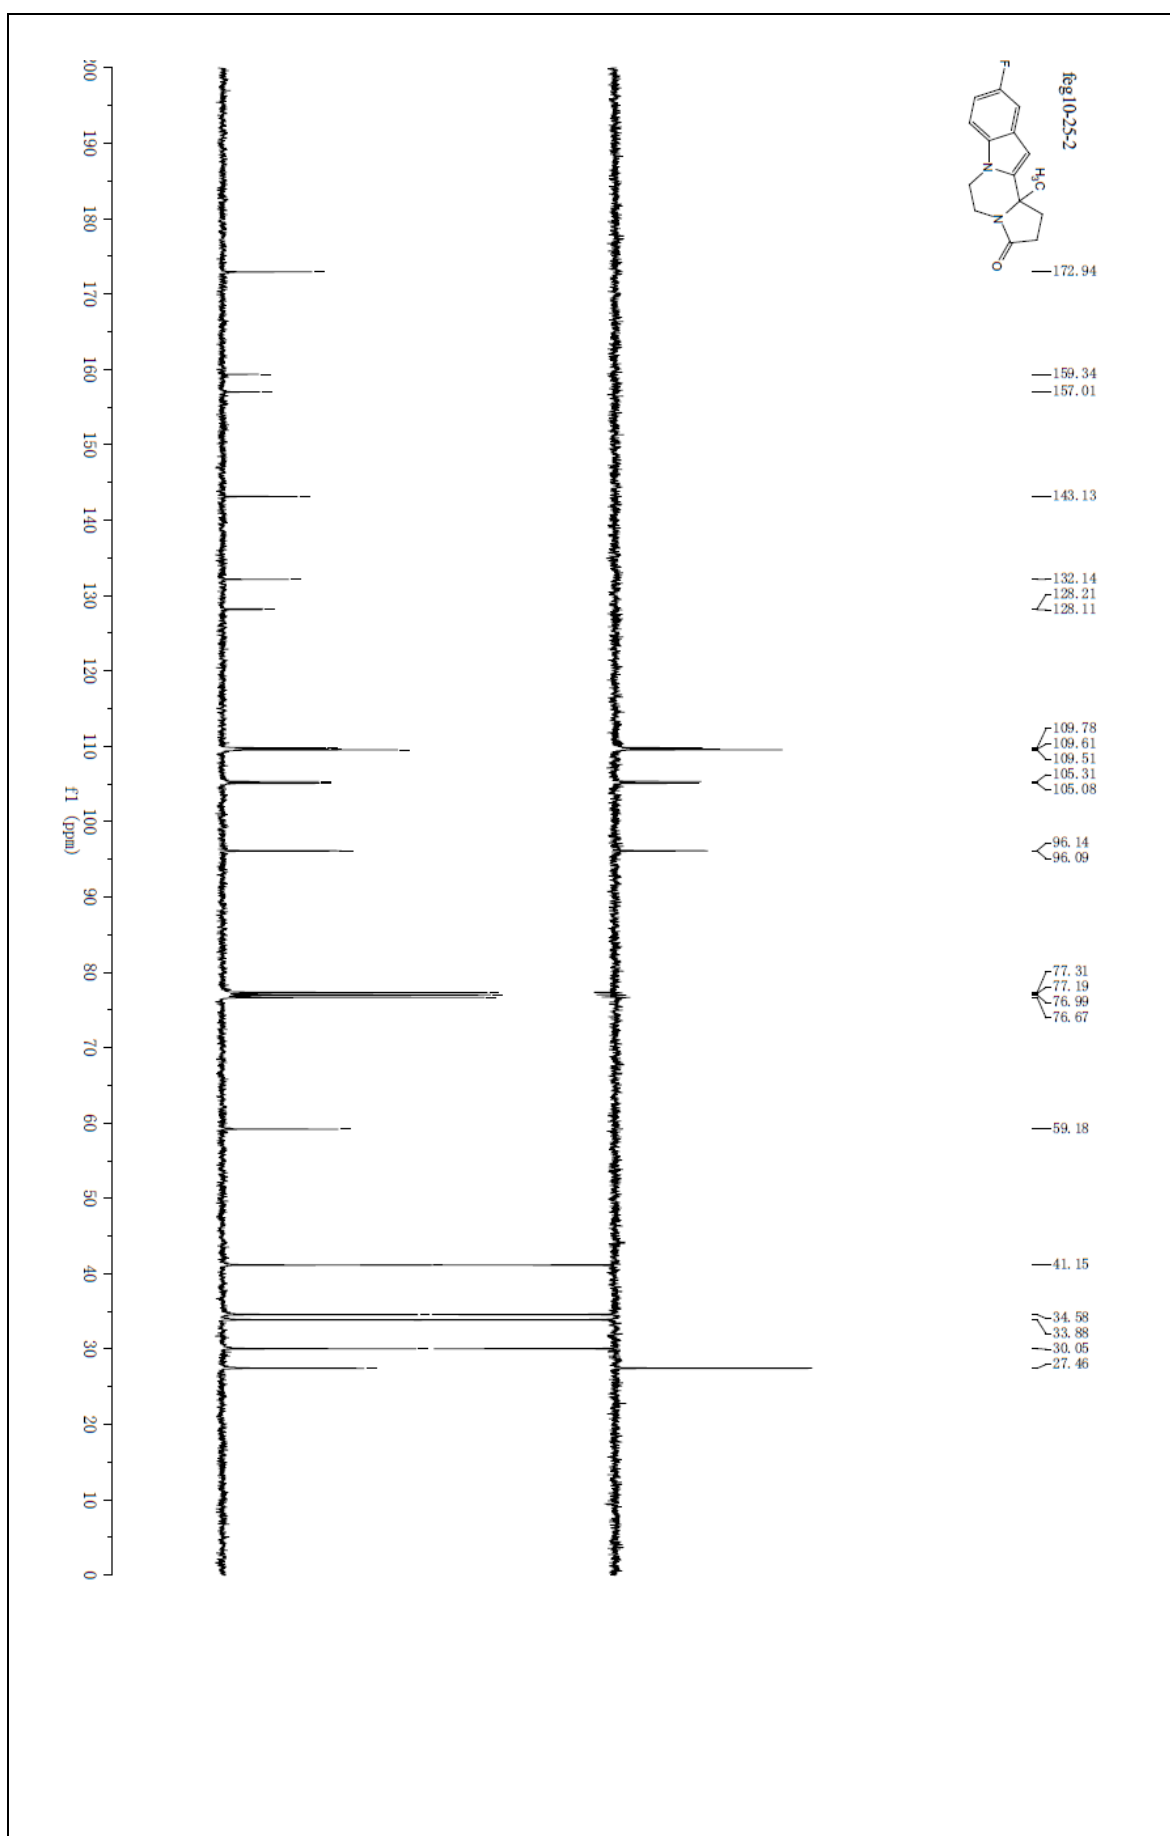

# Compound 3o

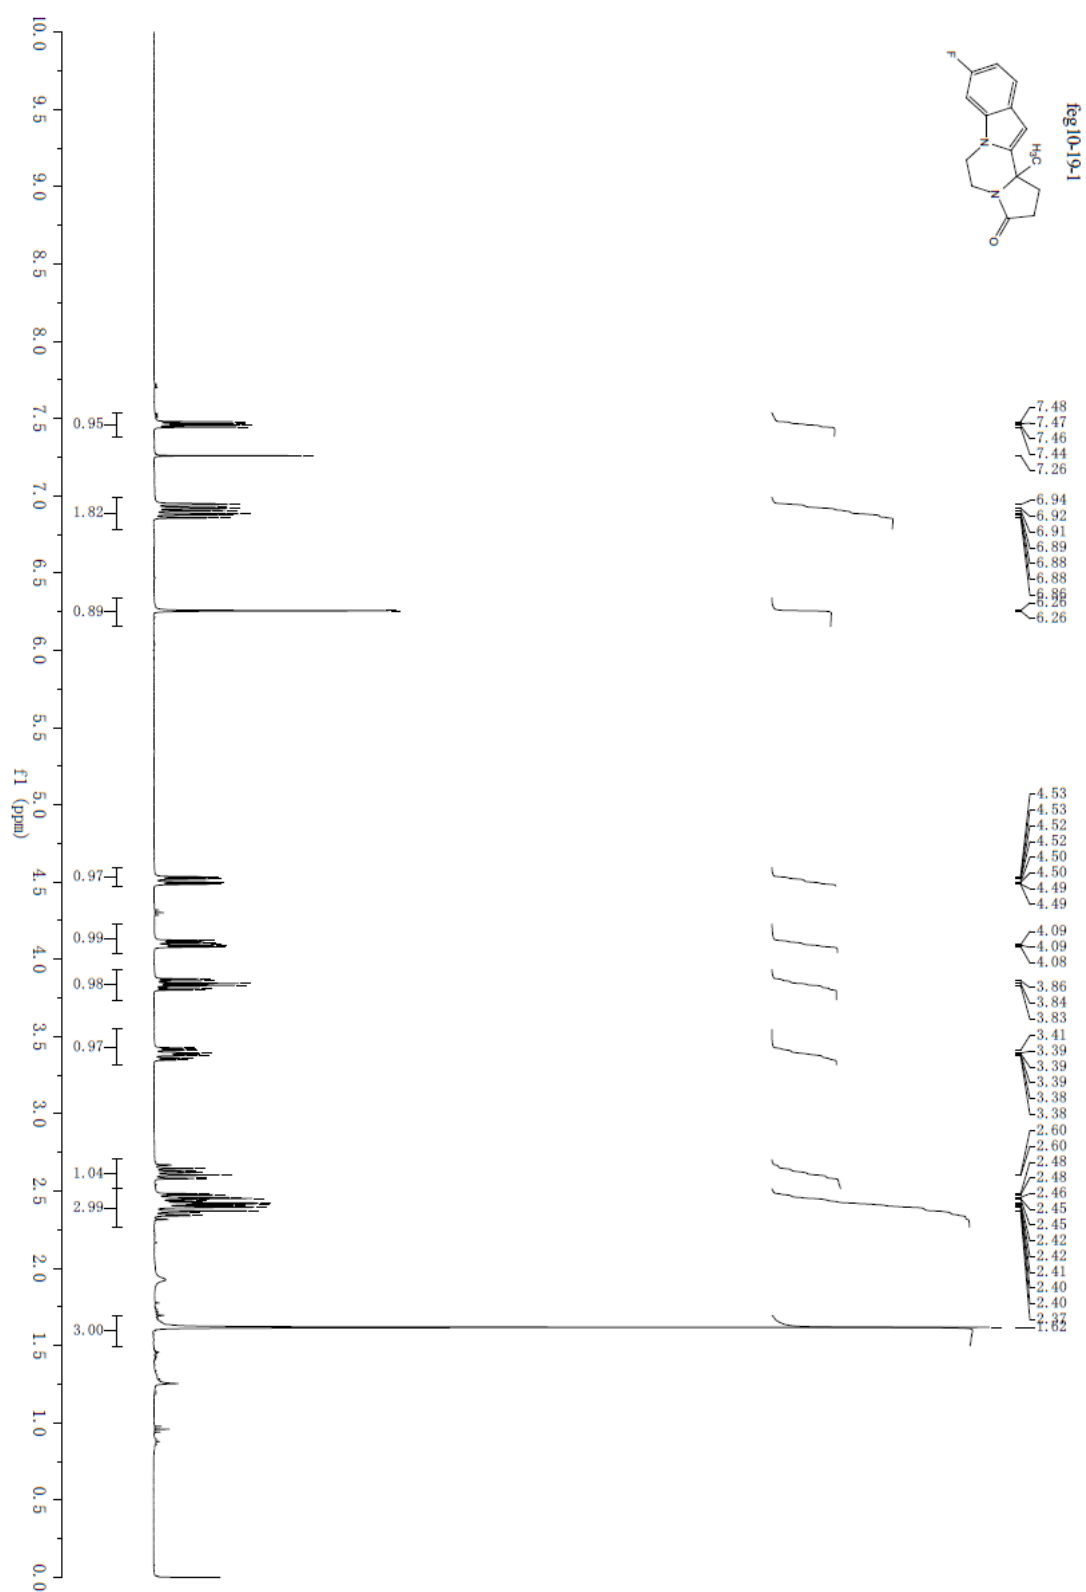



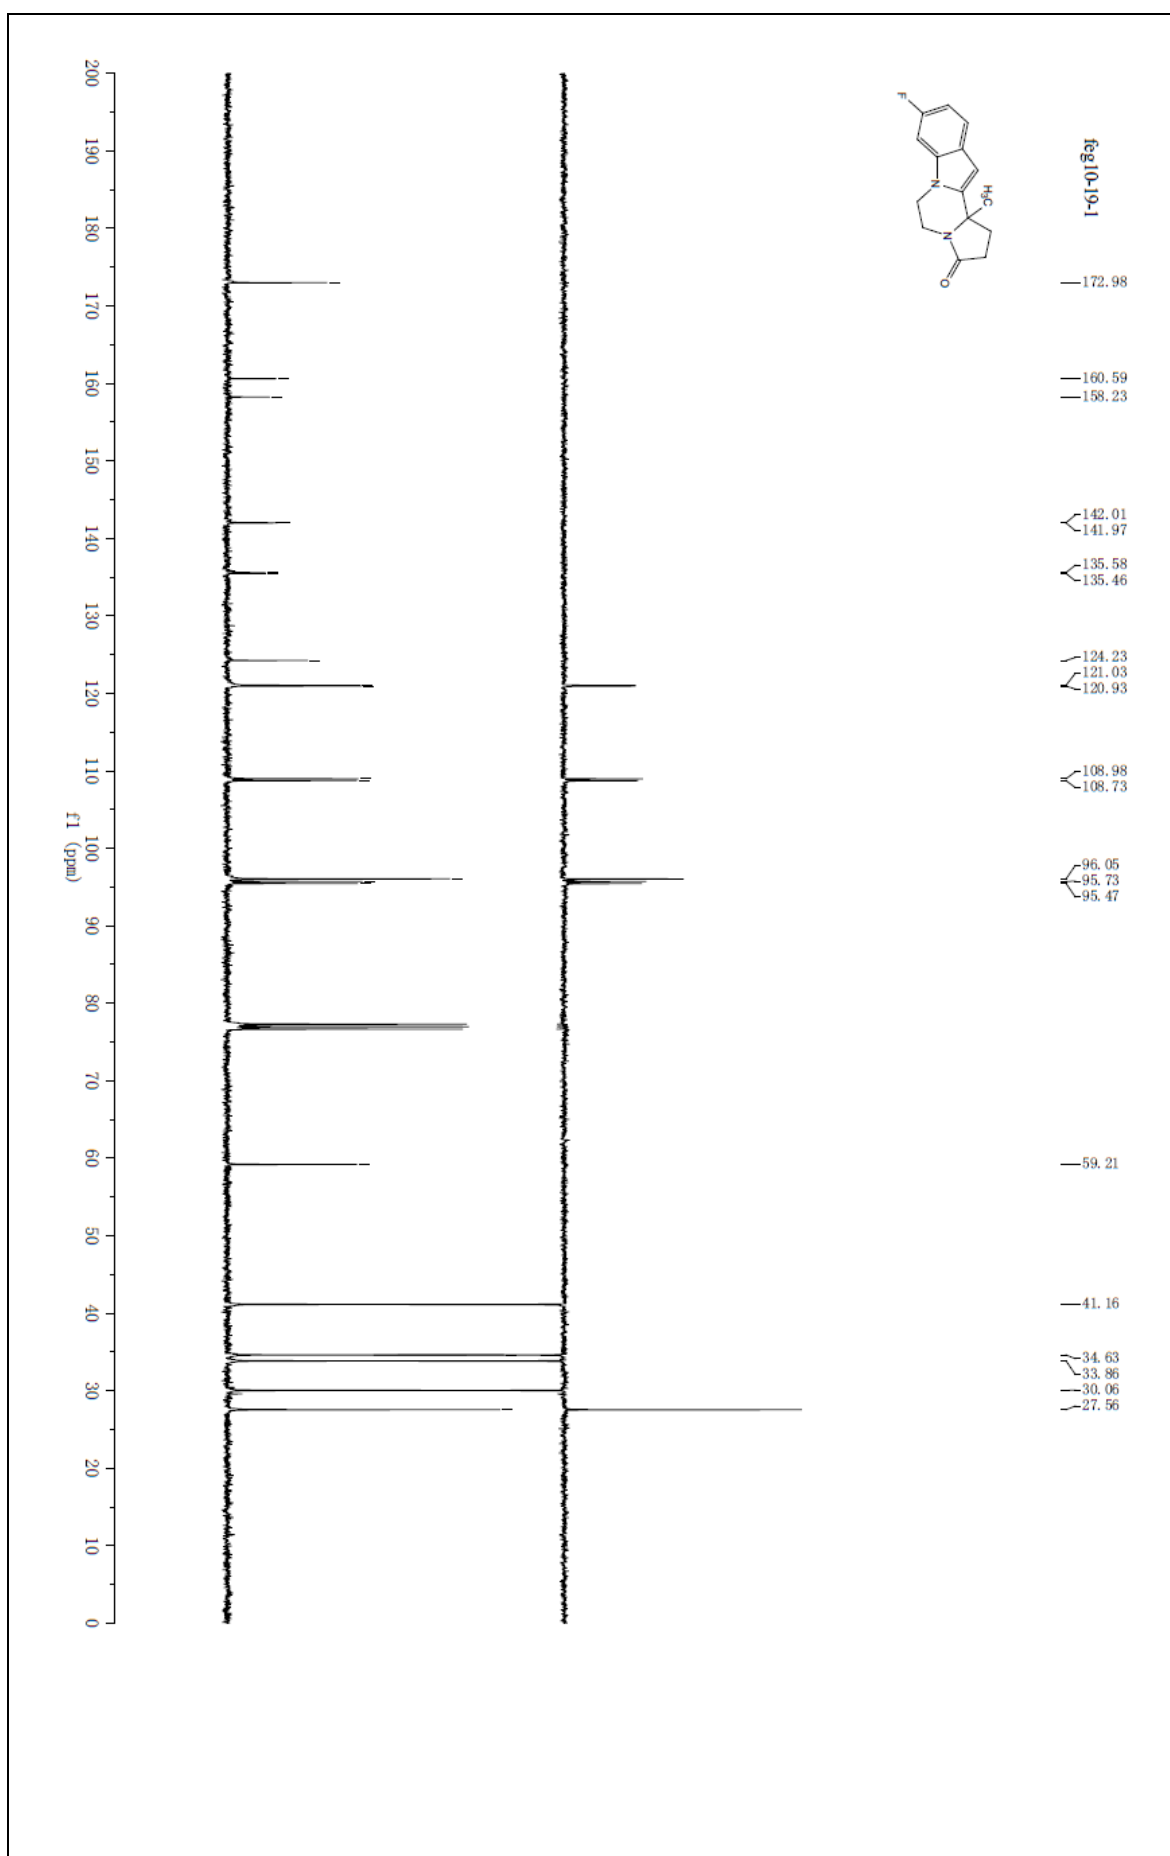

# Compound 3p

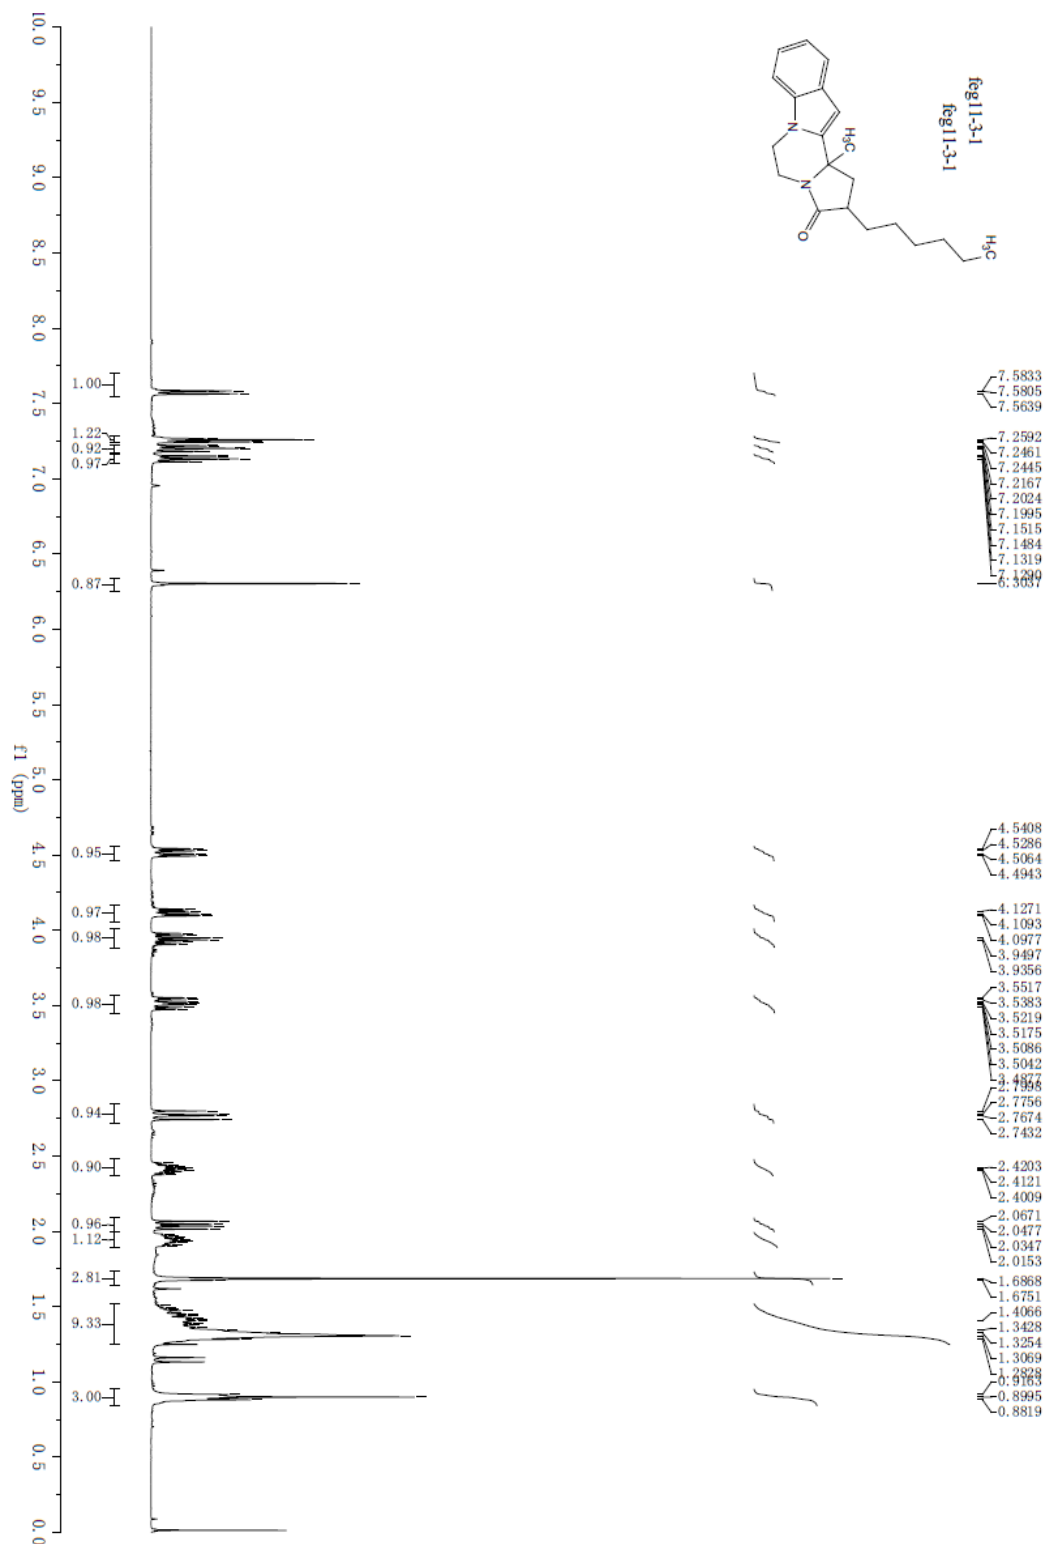

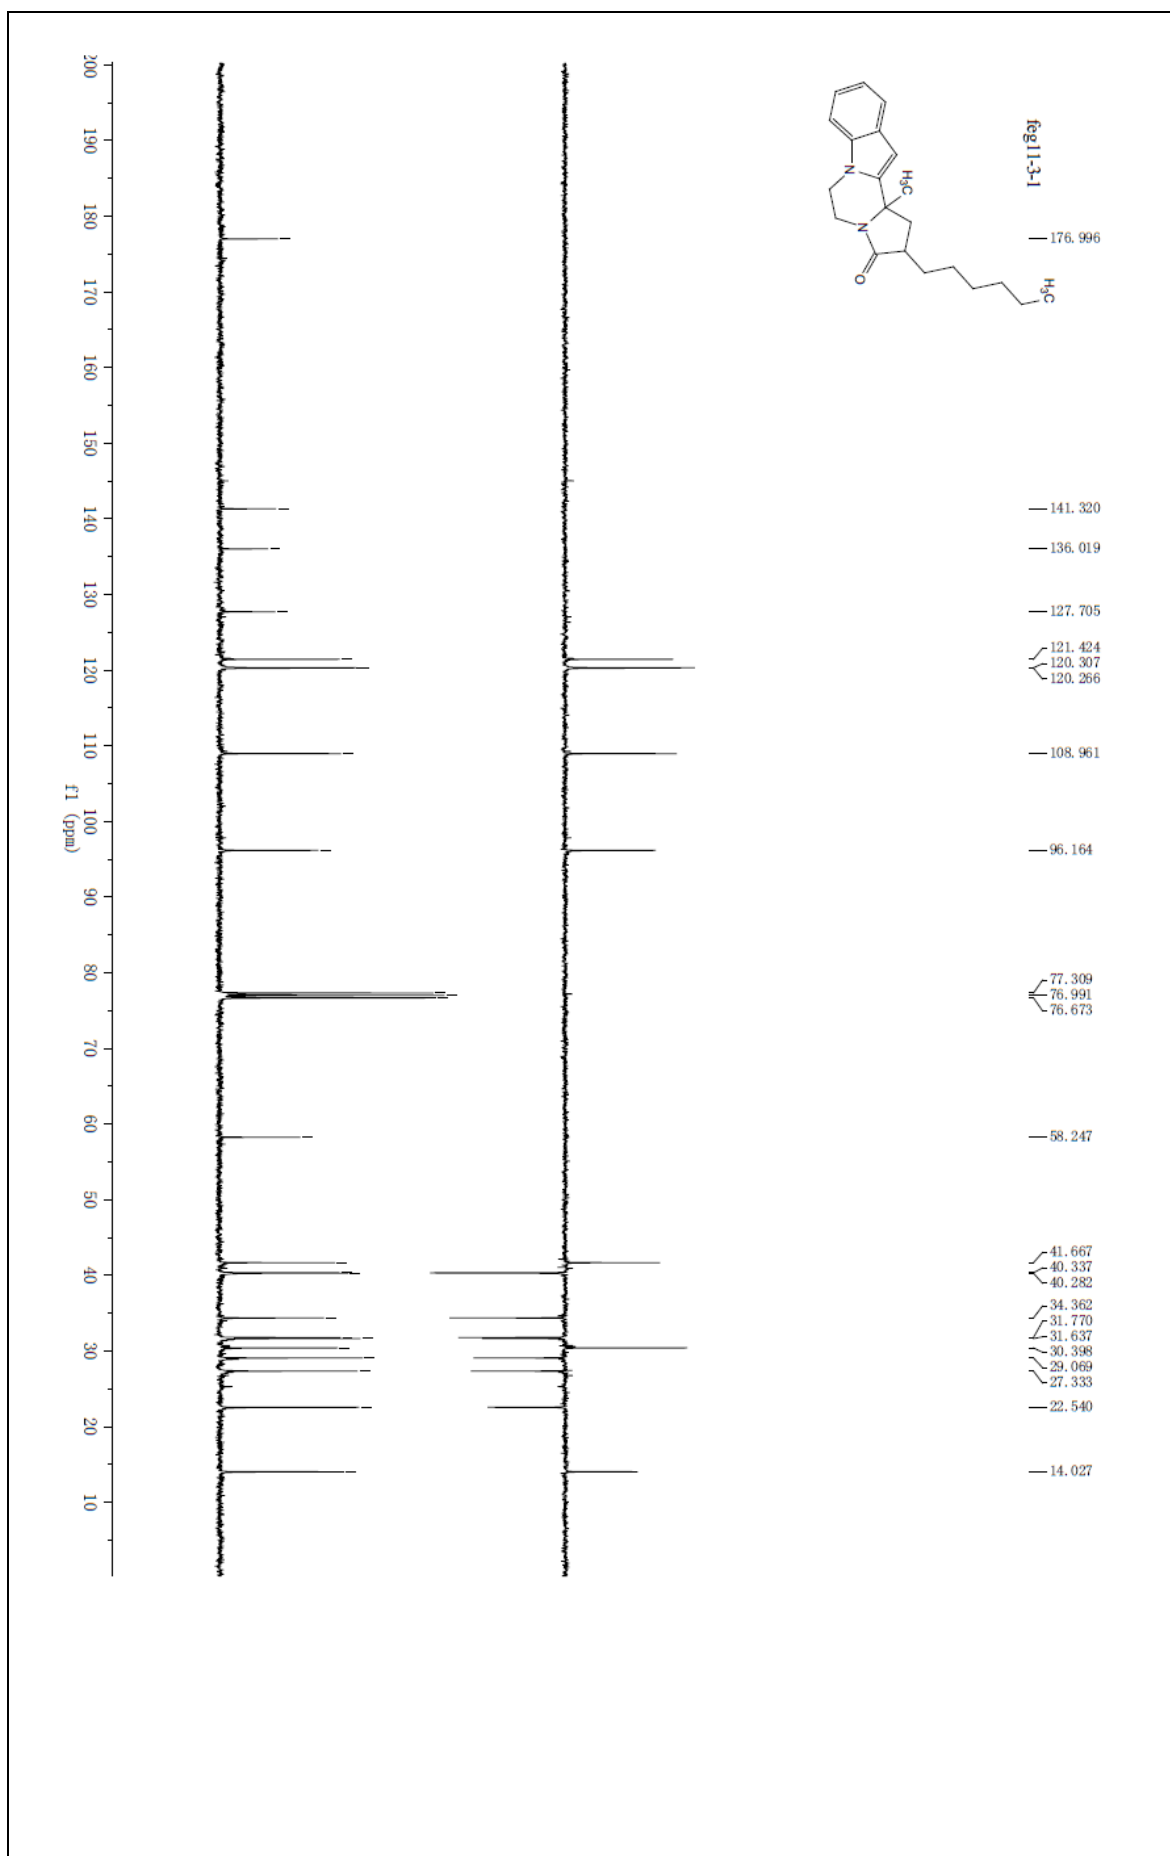

# Compound 3q

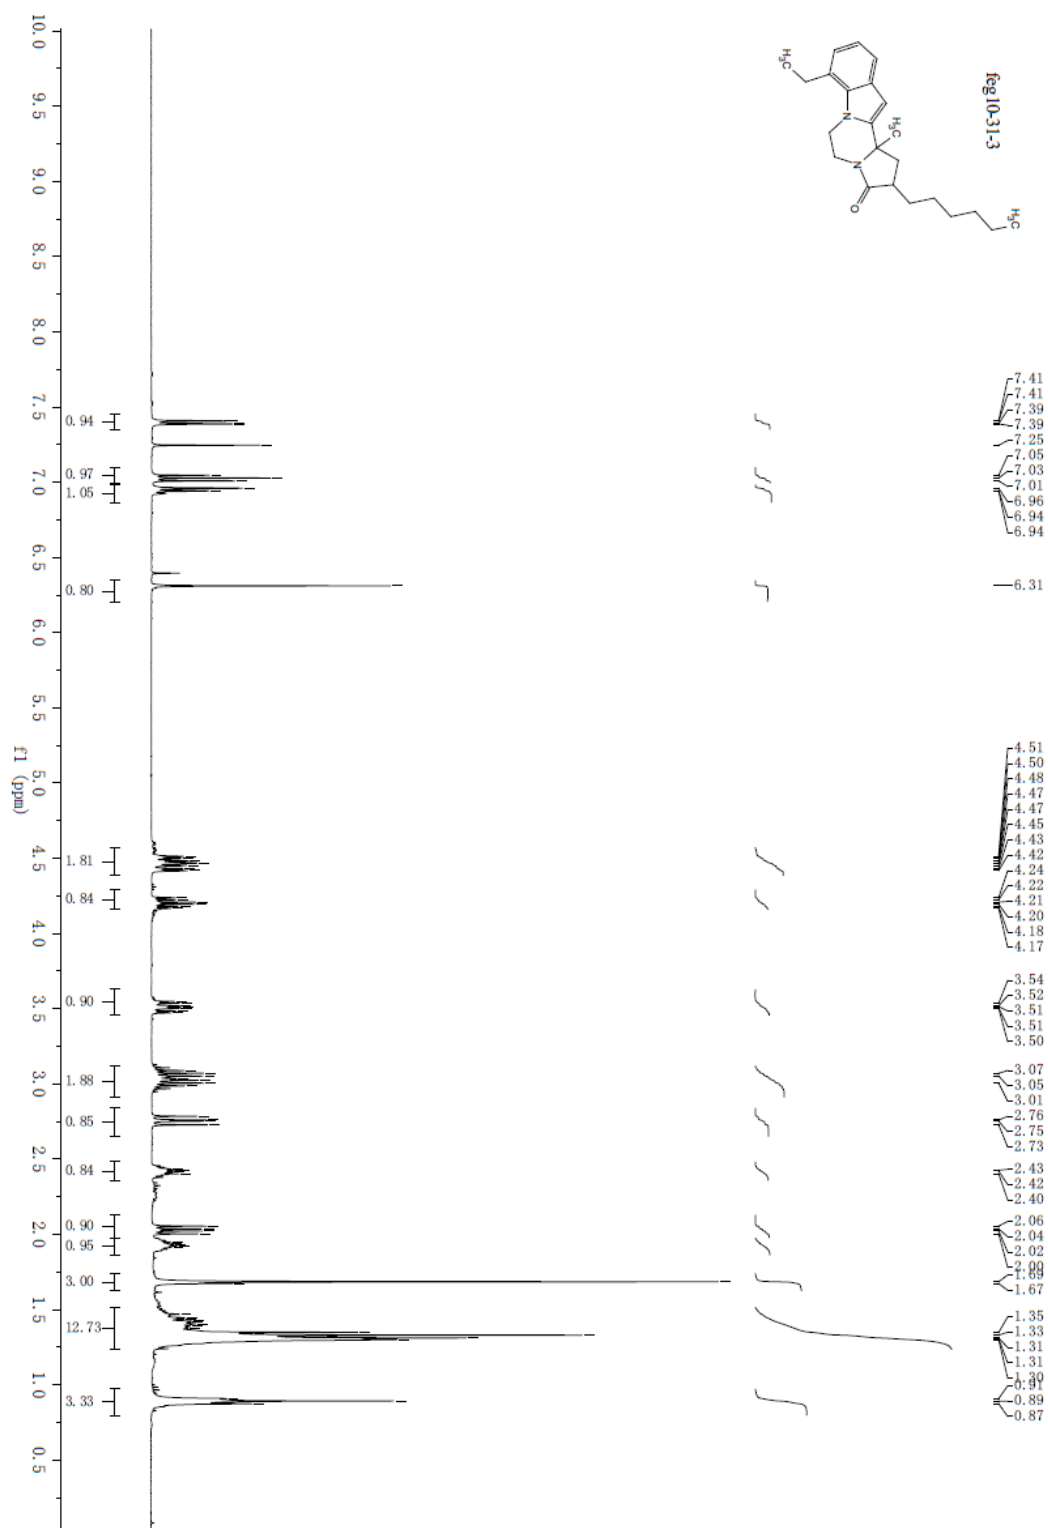

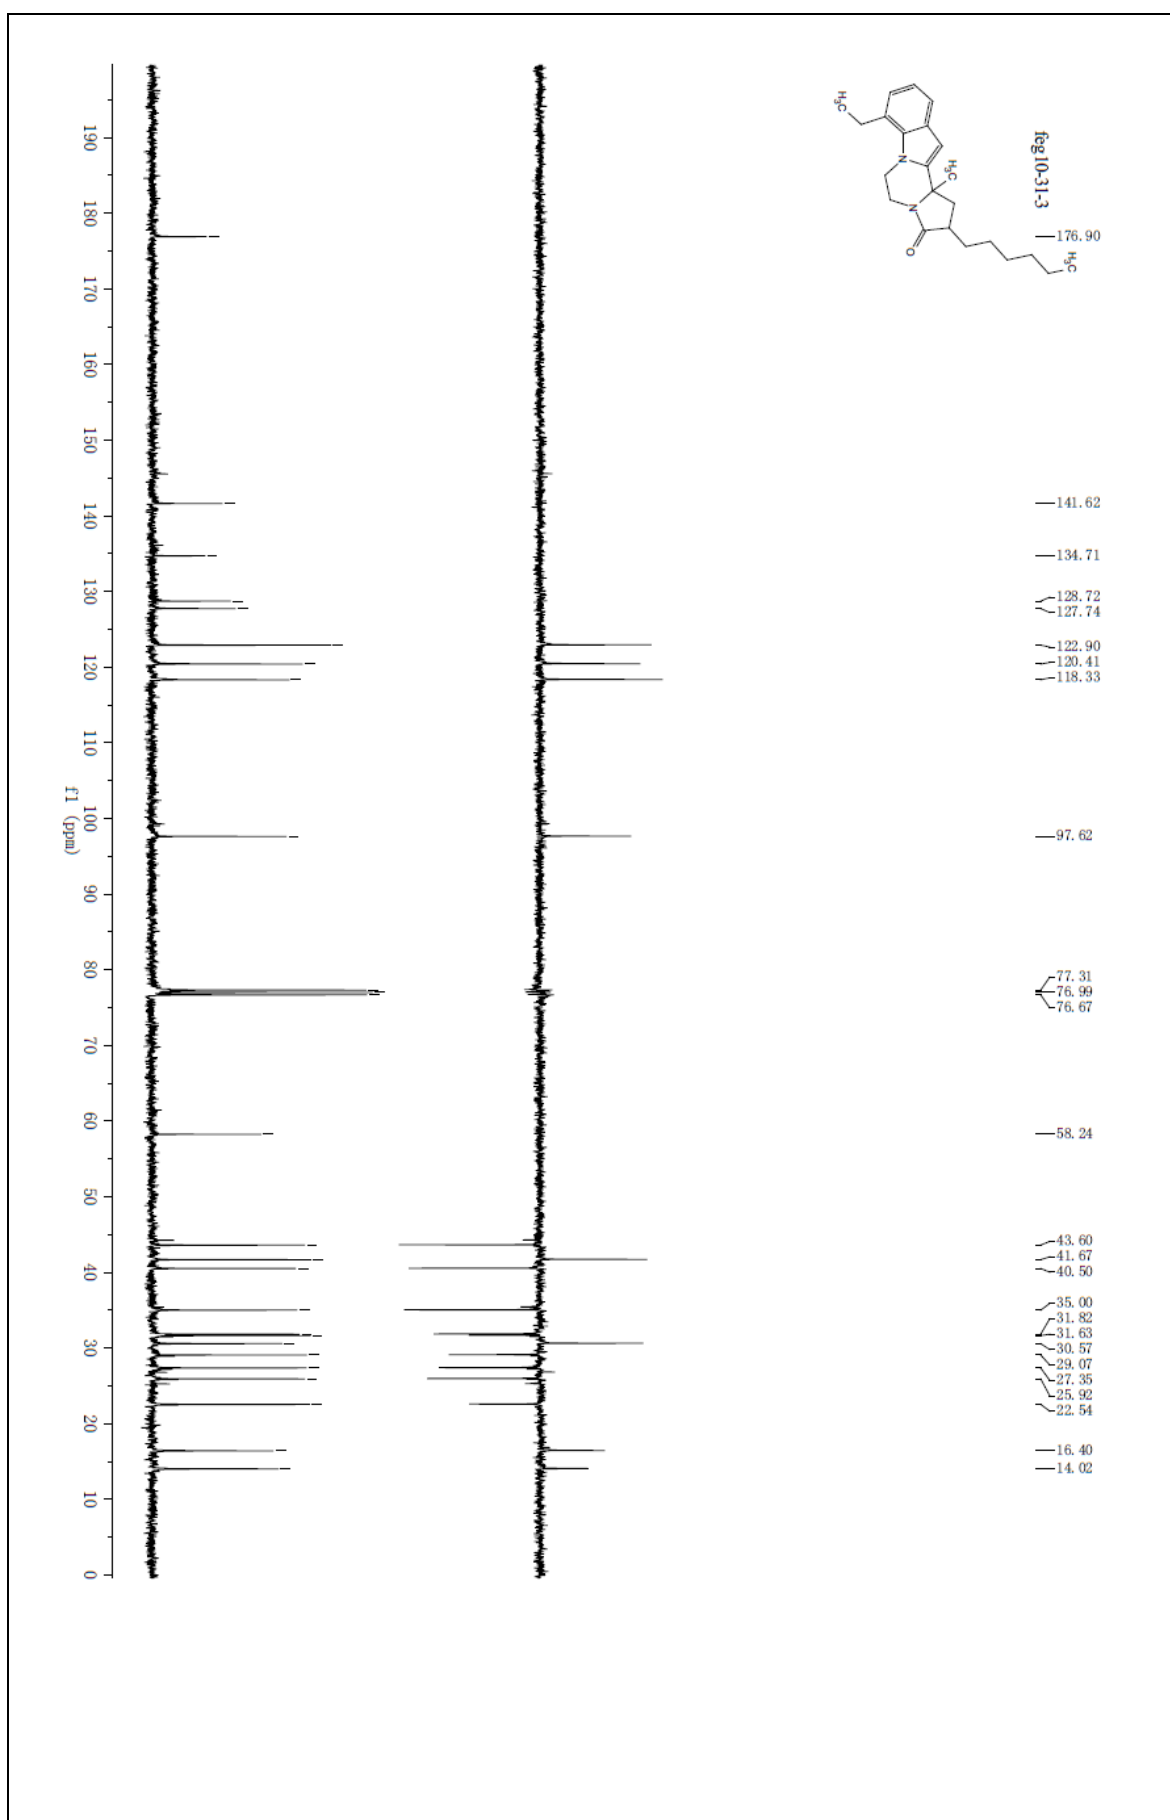

# Compound 3r

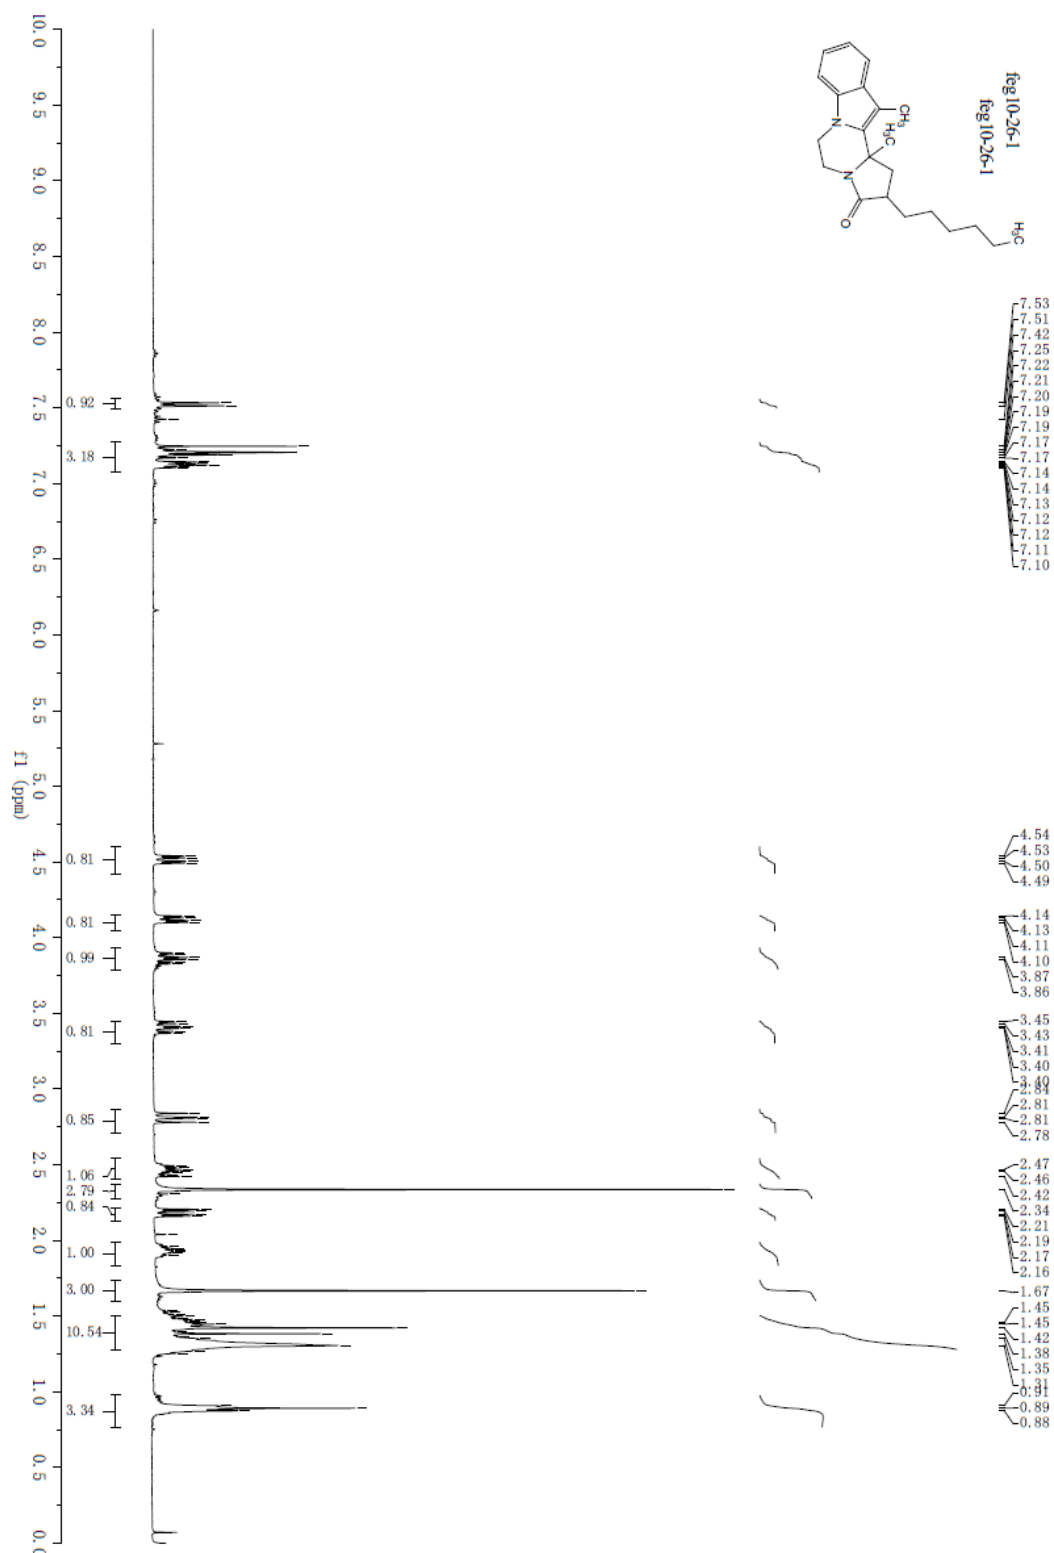

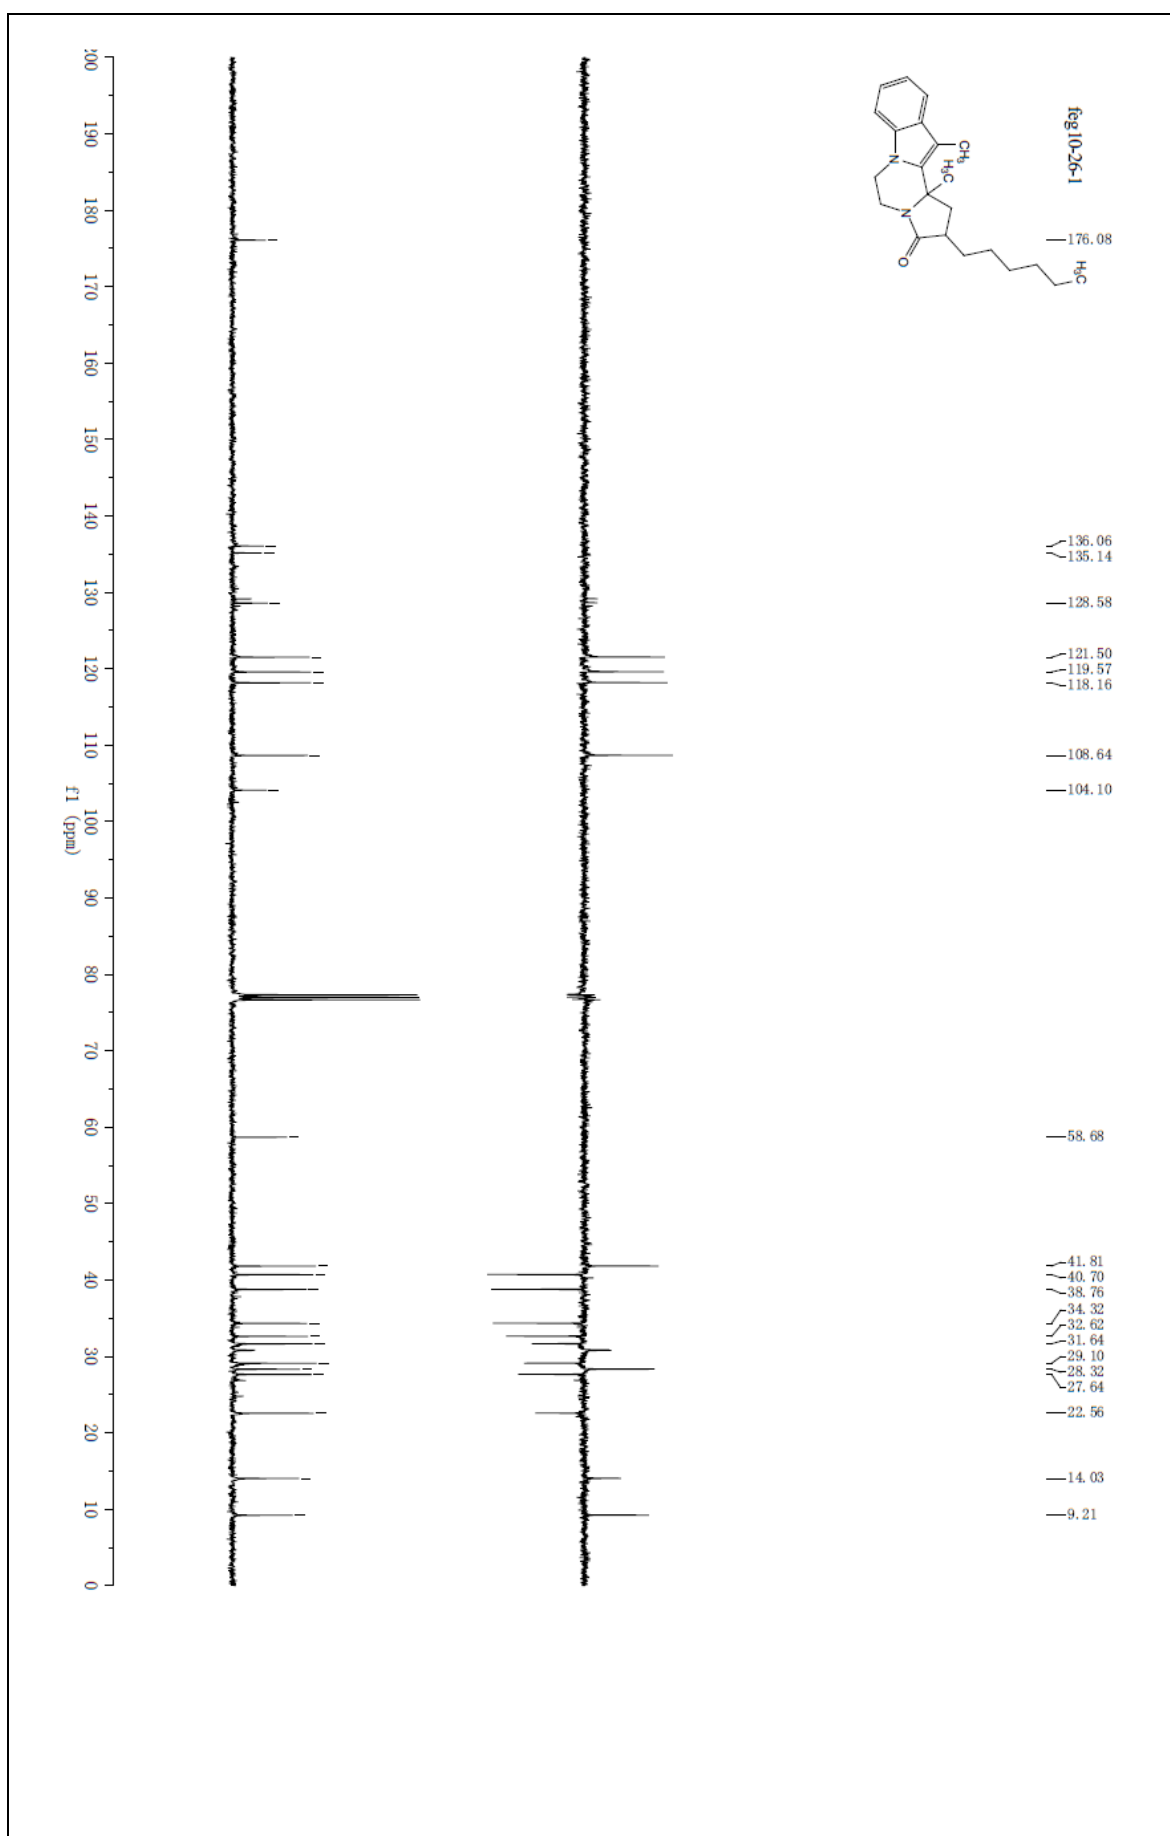

# Compound 3s

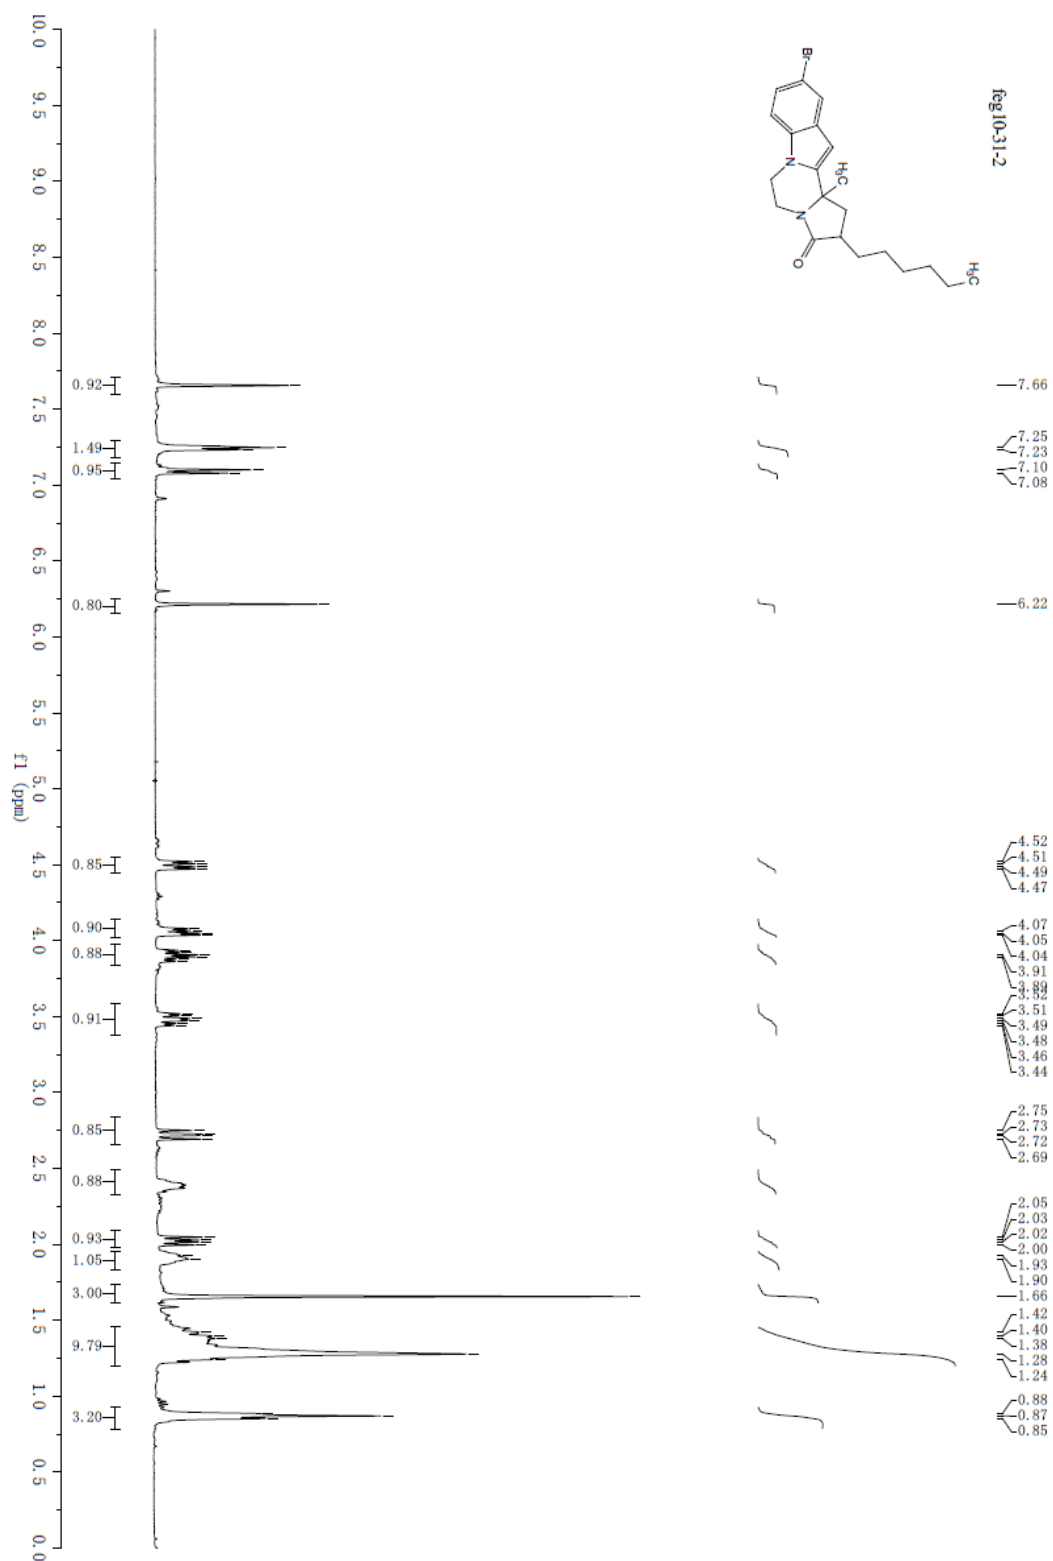



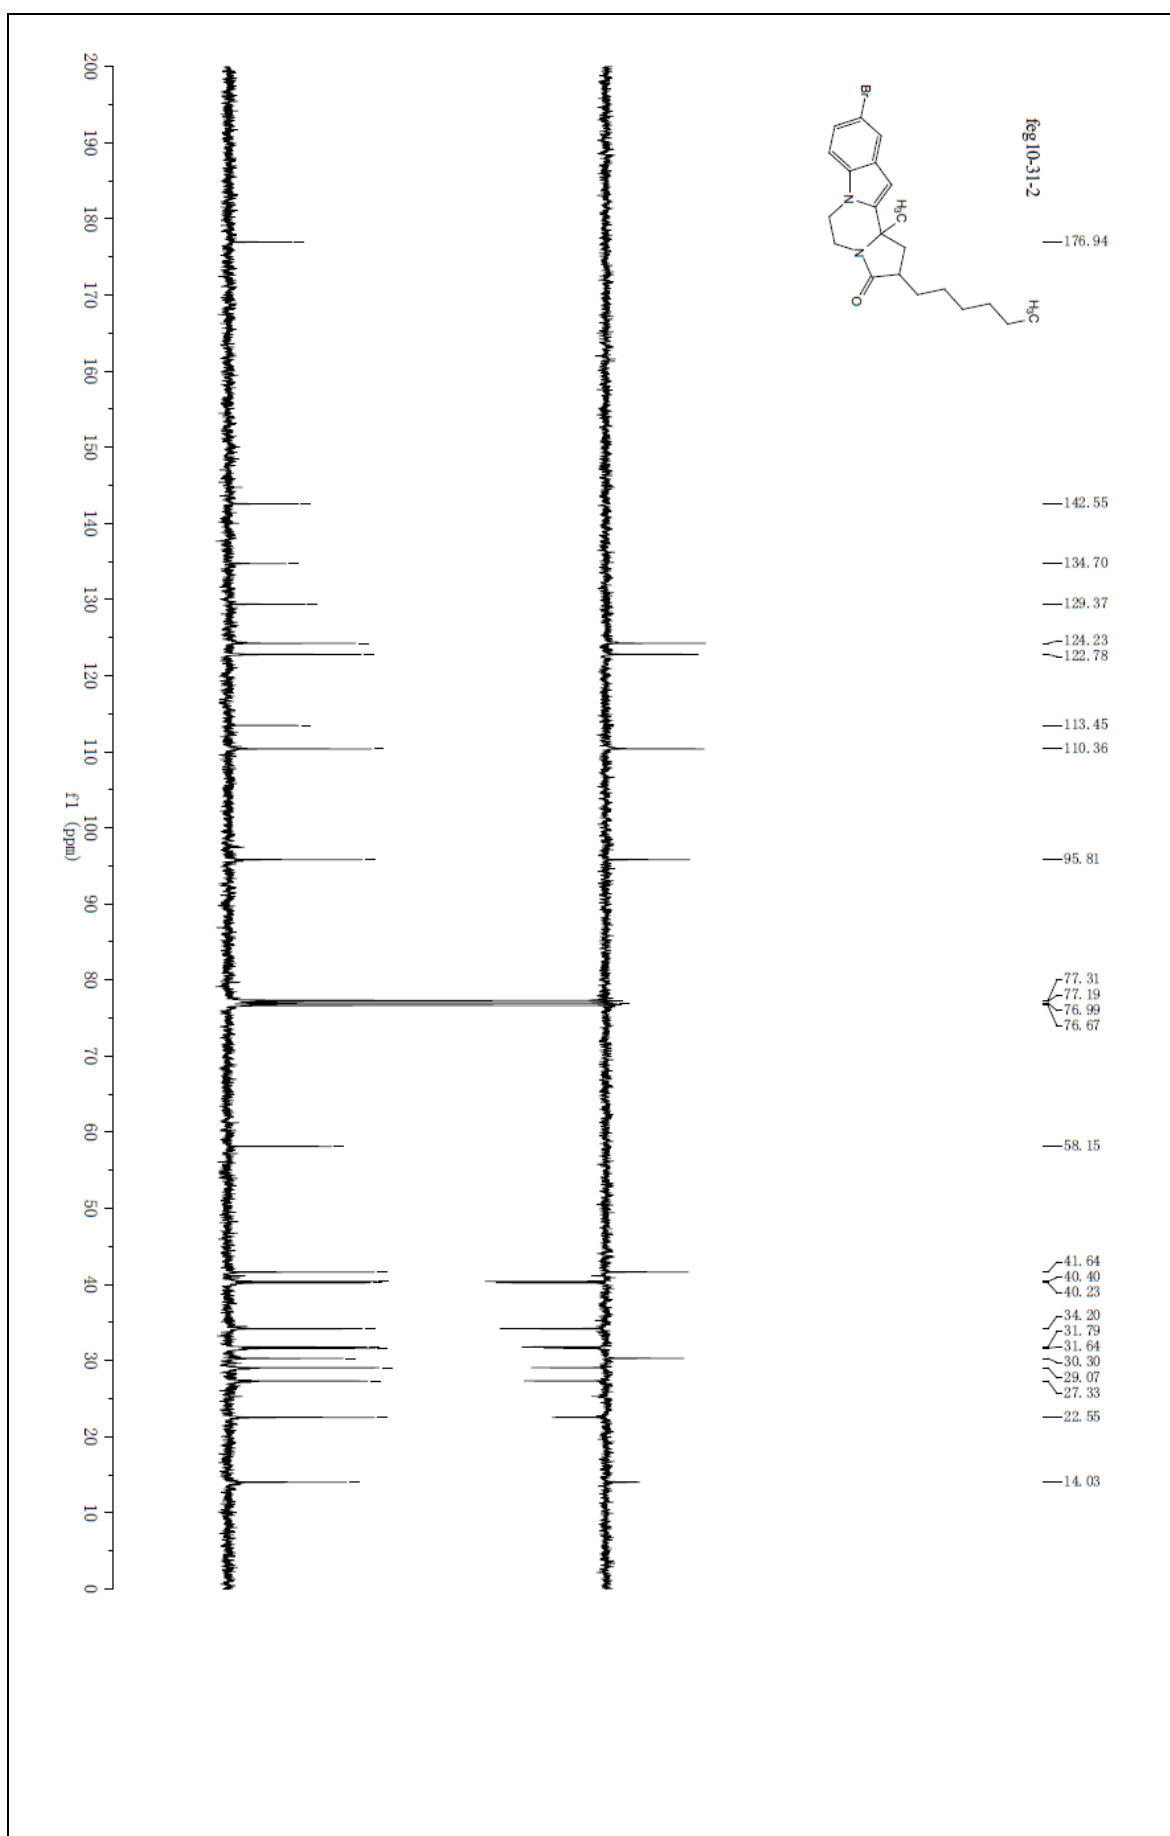

# Compound 3Aa

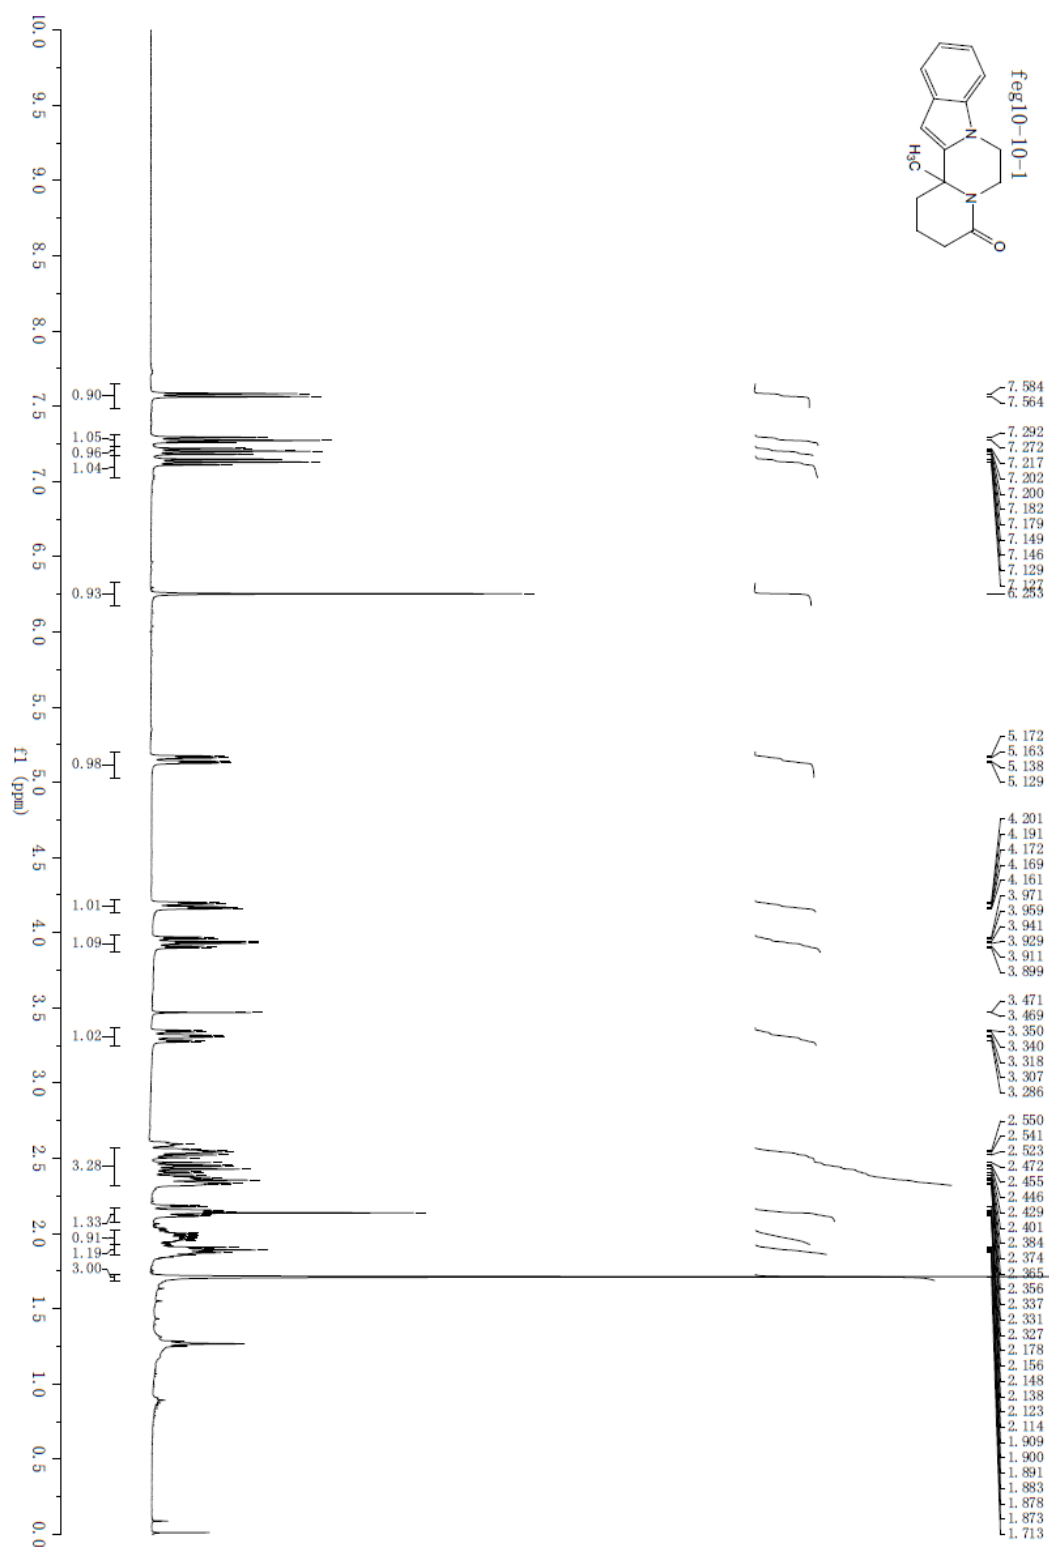

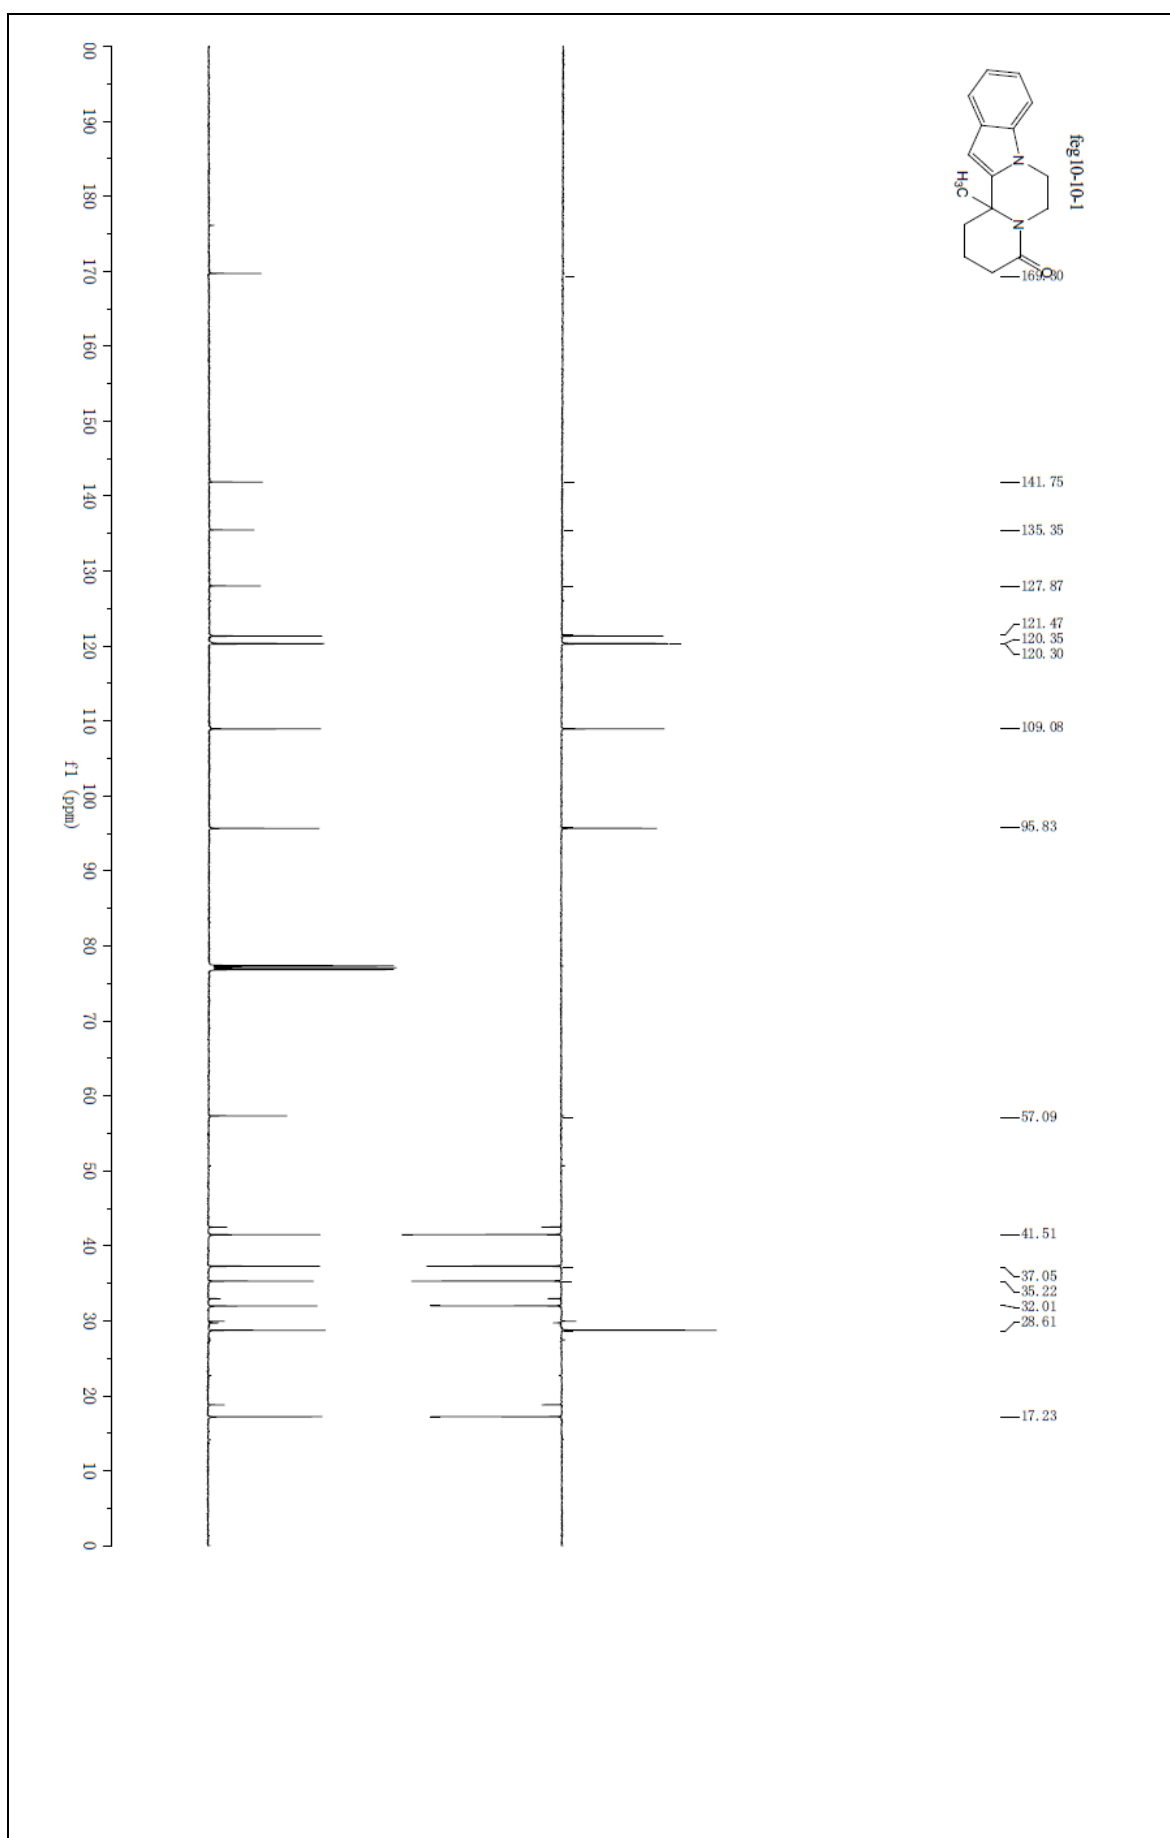

# Compound 3Ab

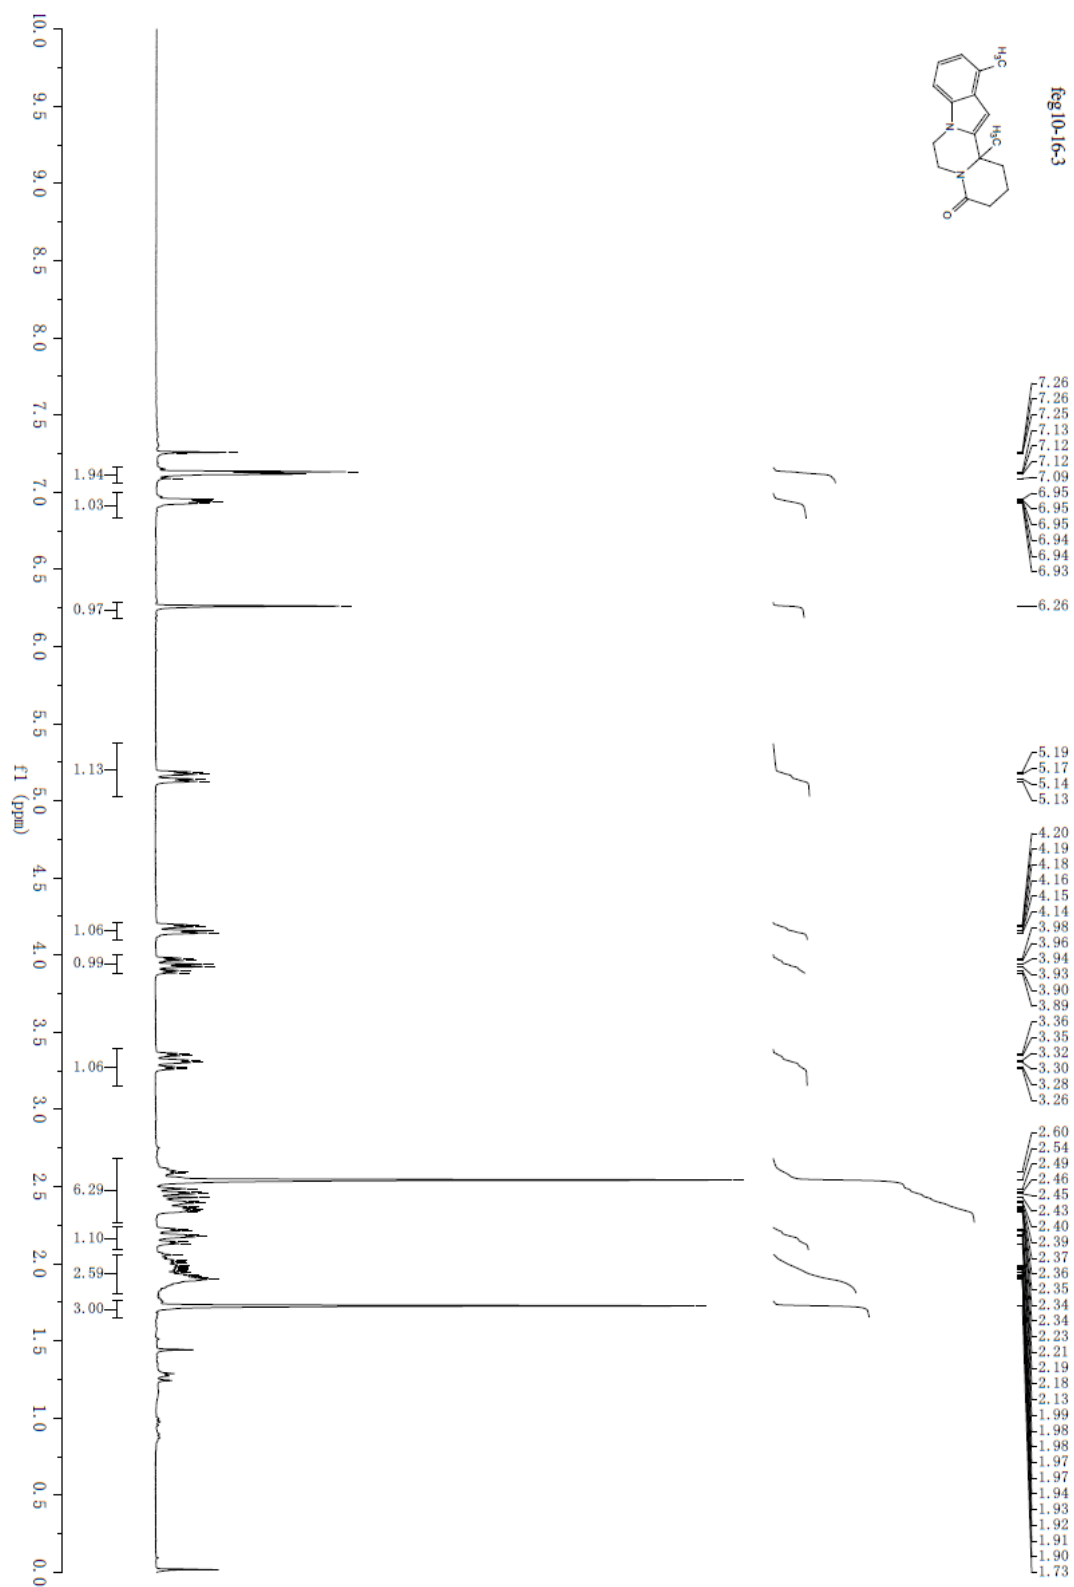

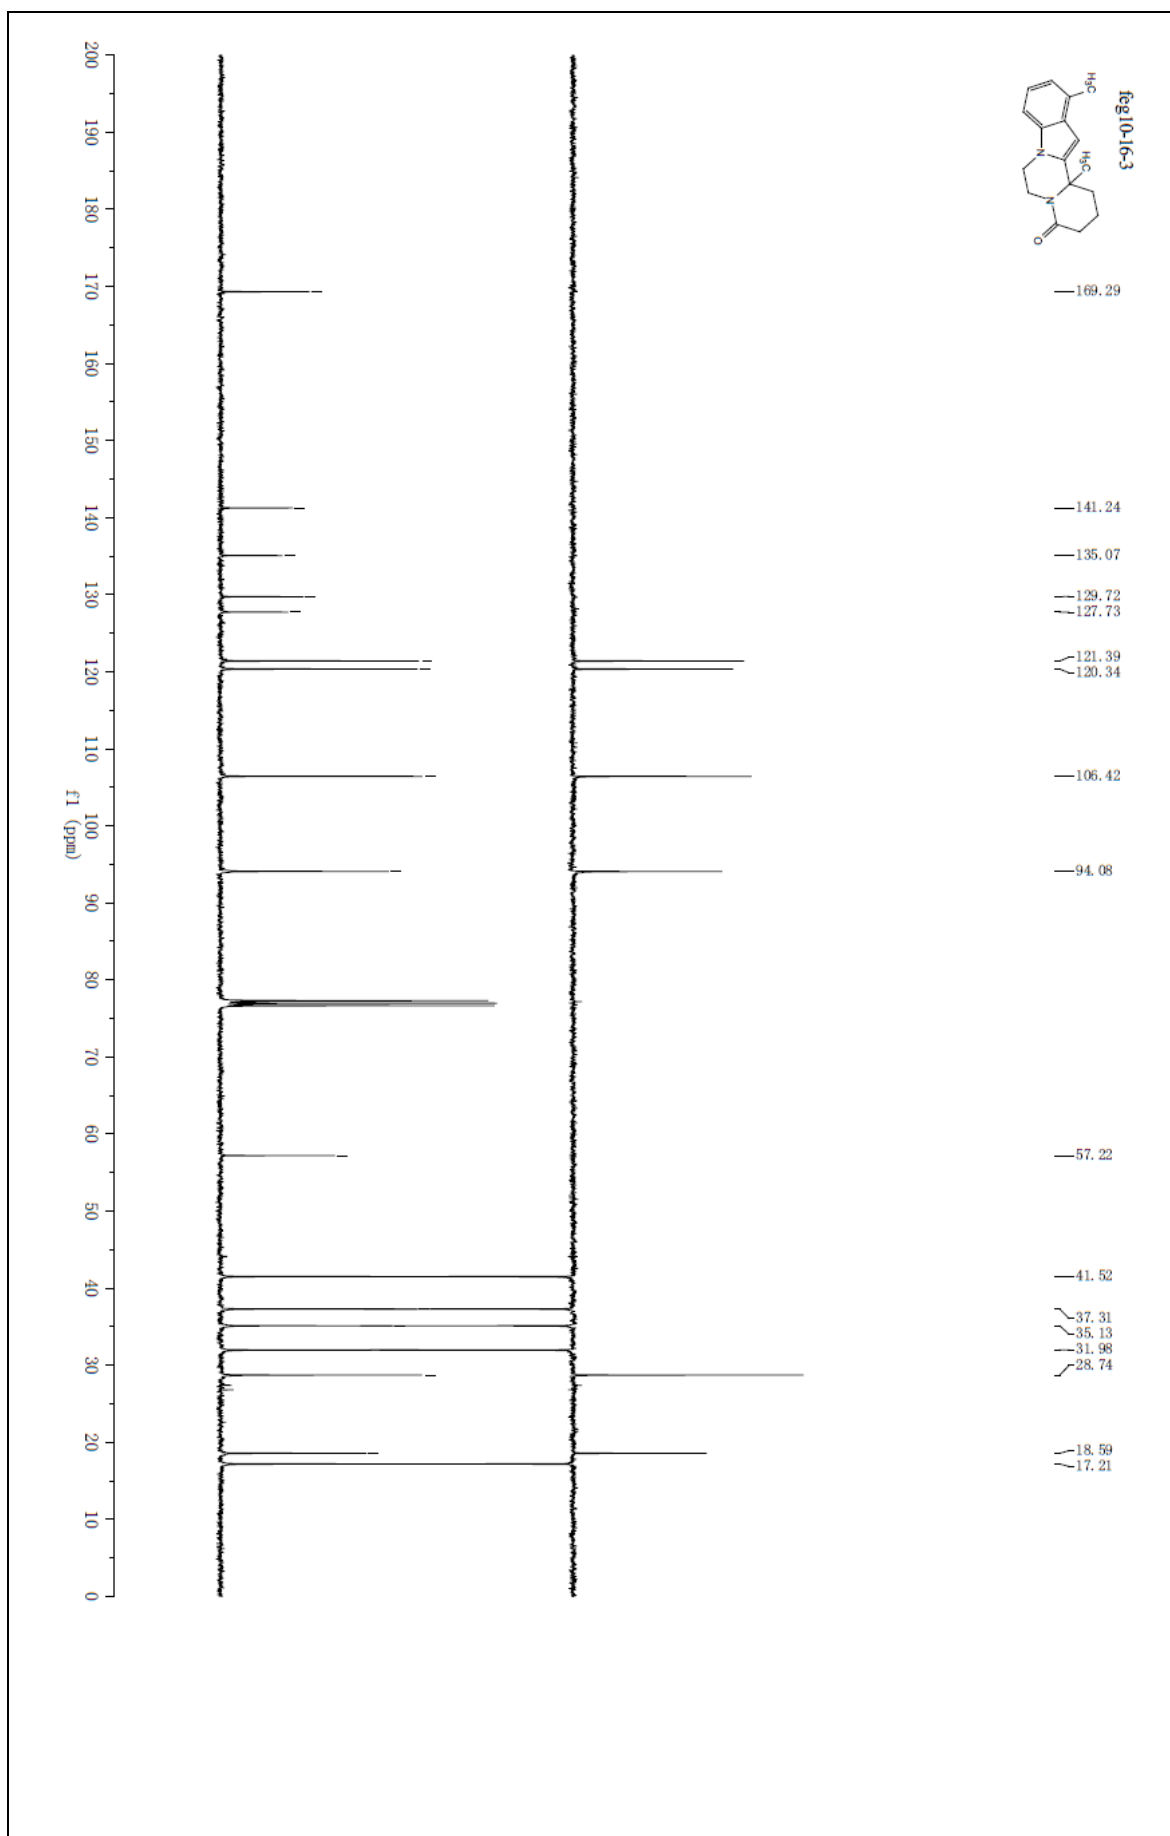

# Compound 3Ac

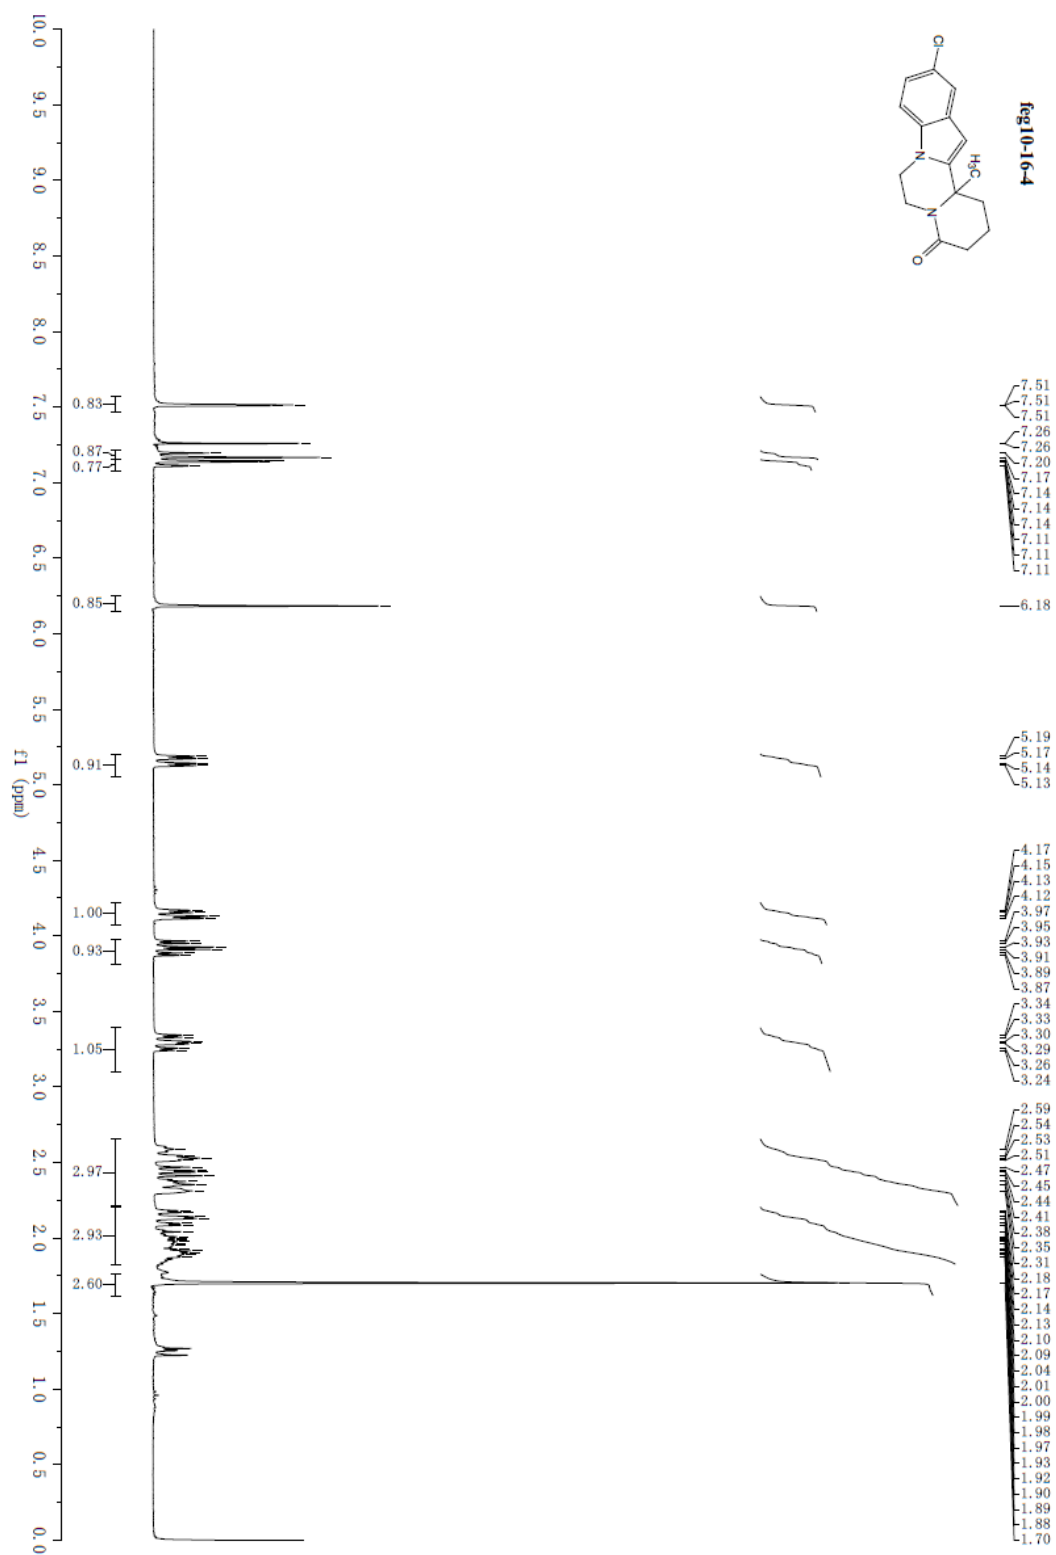

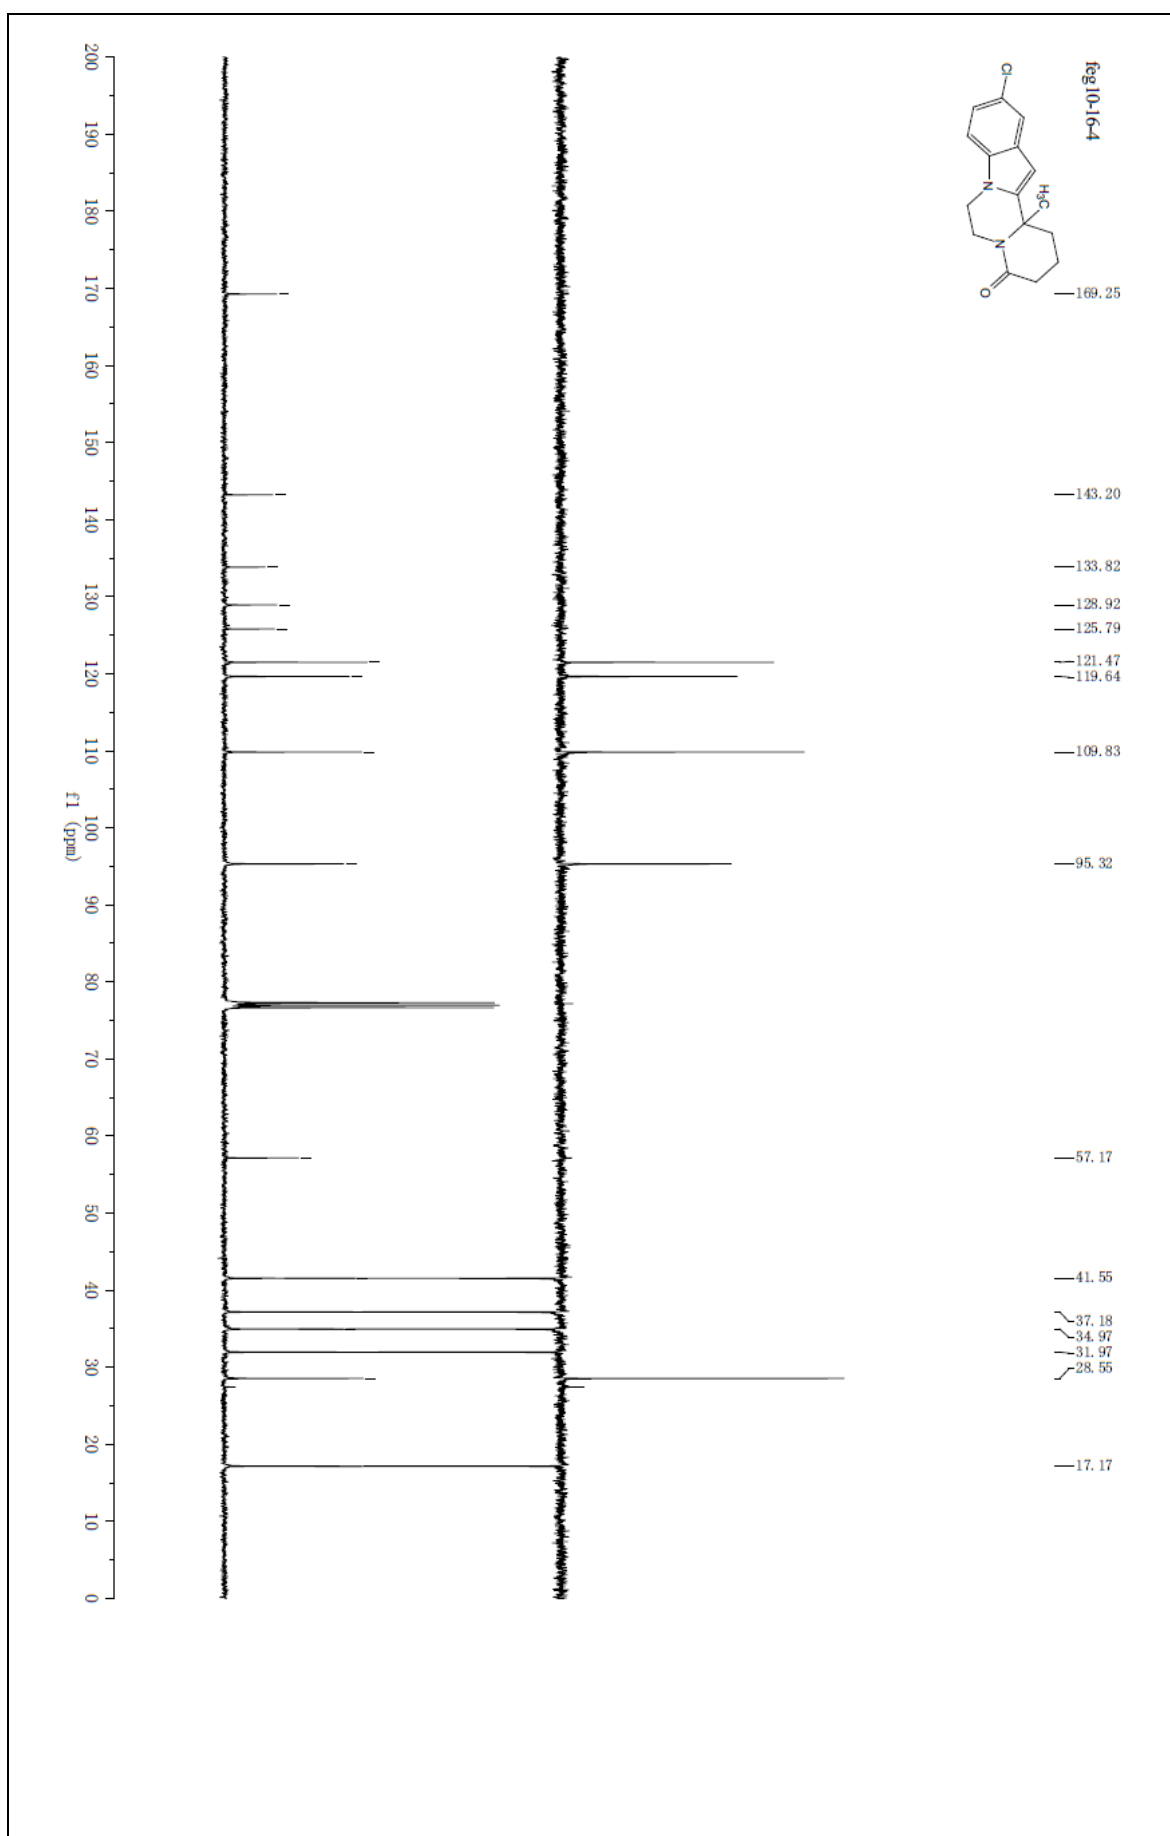

# Compound 3Ad

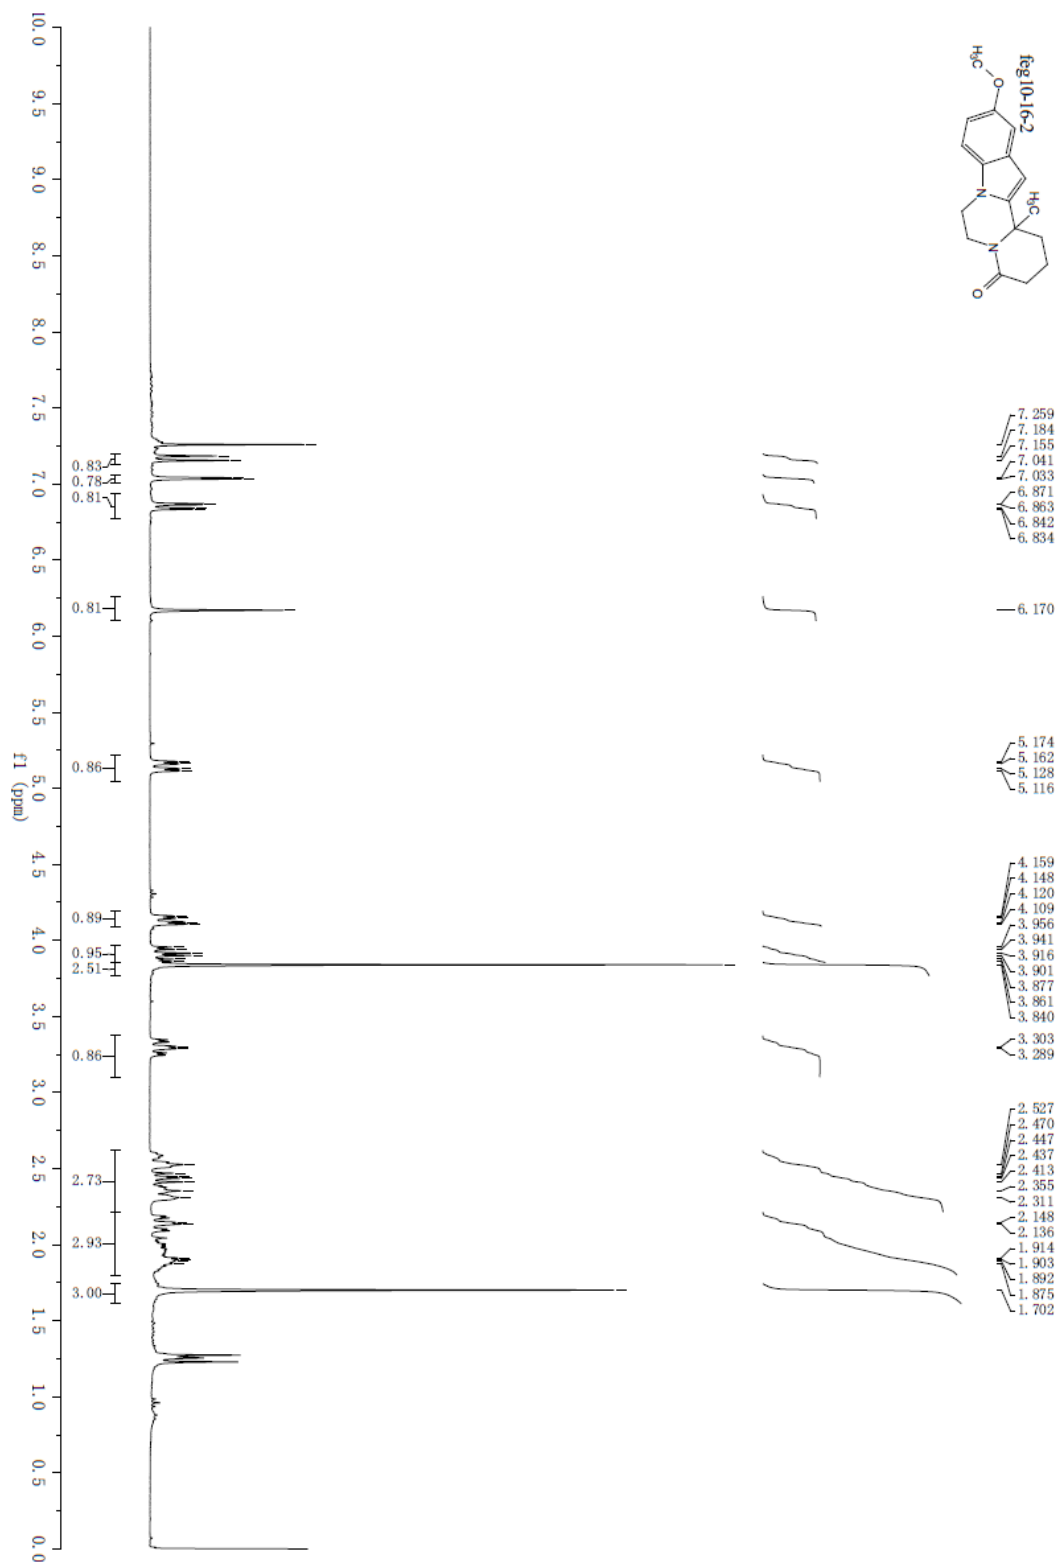



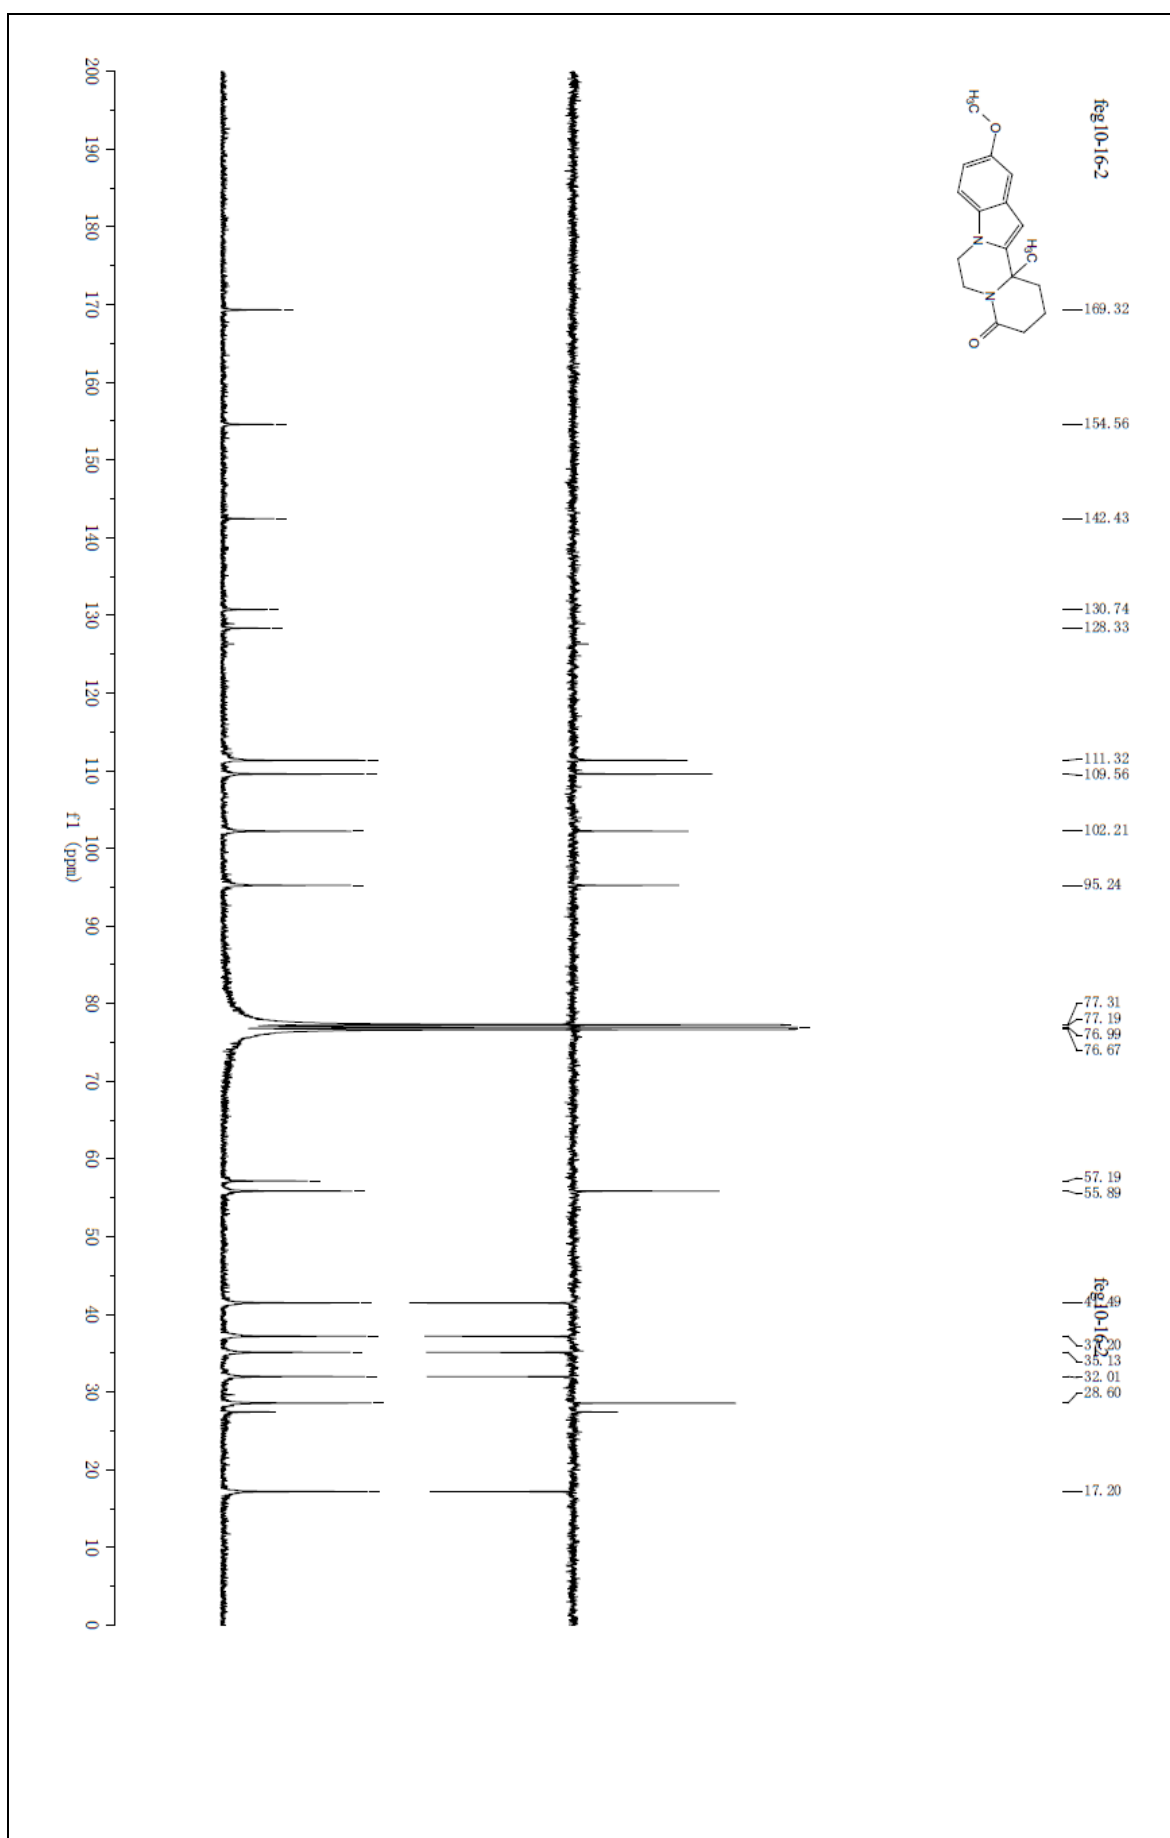

# Compound 3Ae

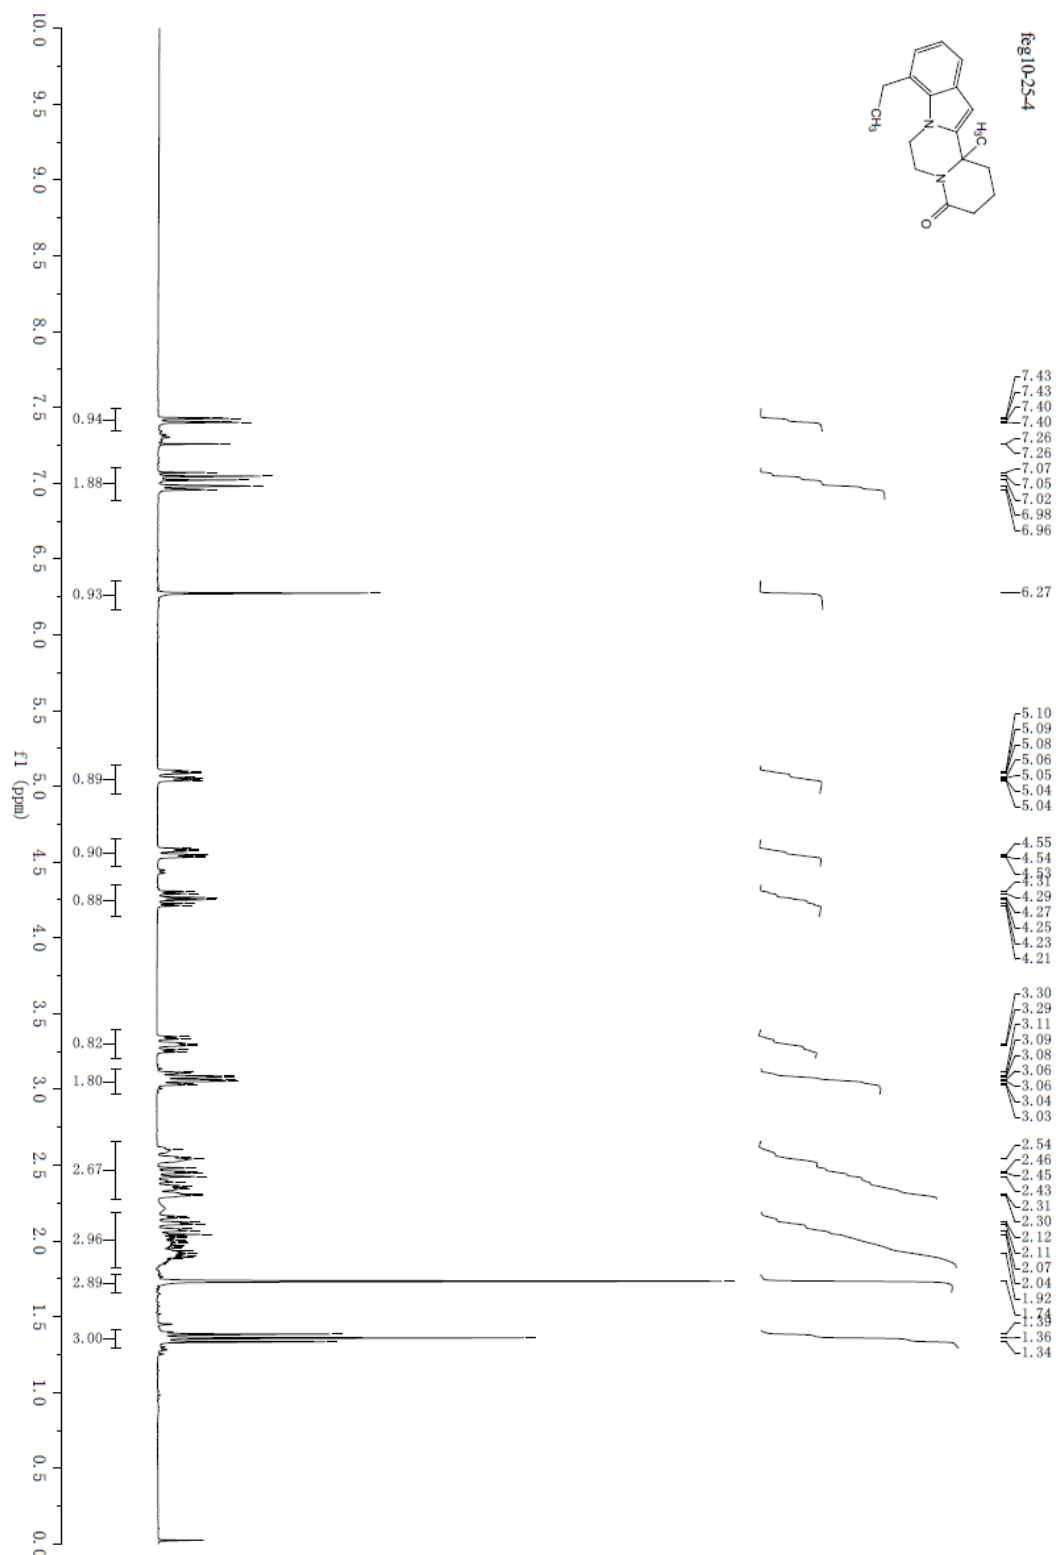

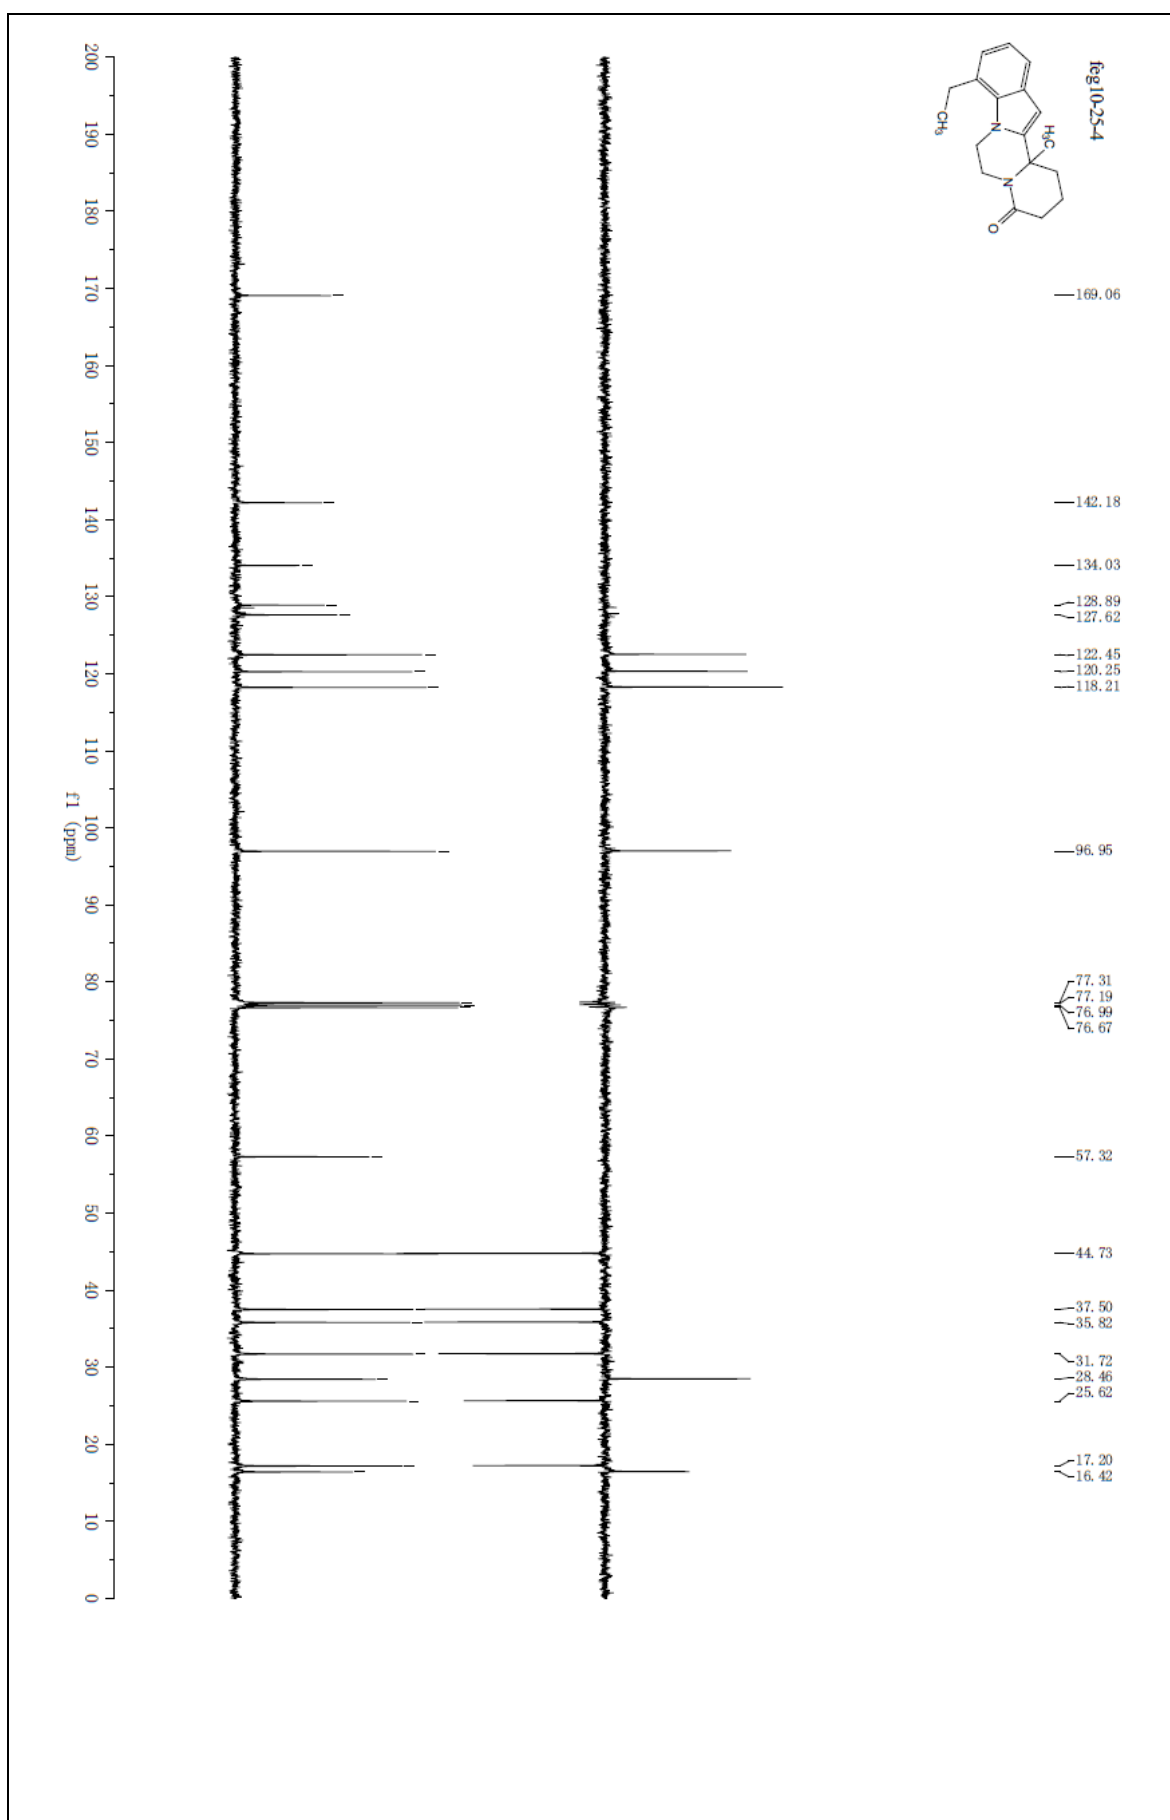

# Compound 3Af

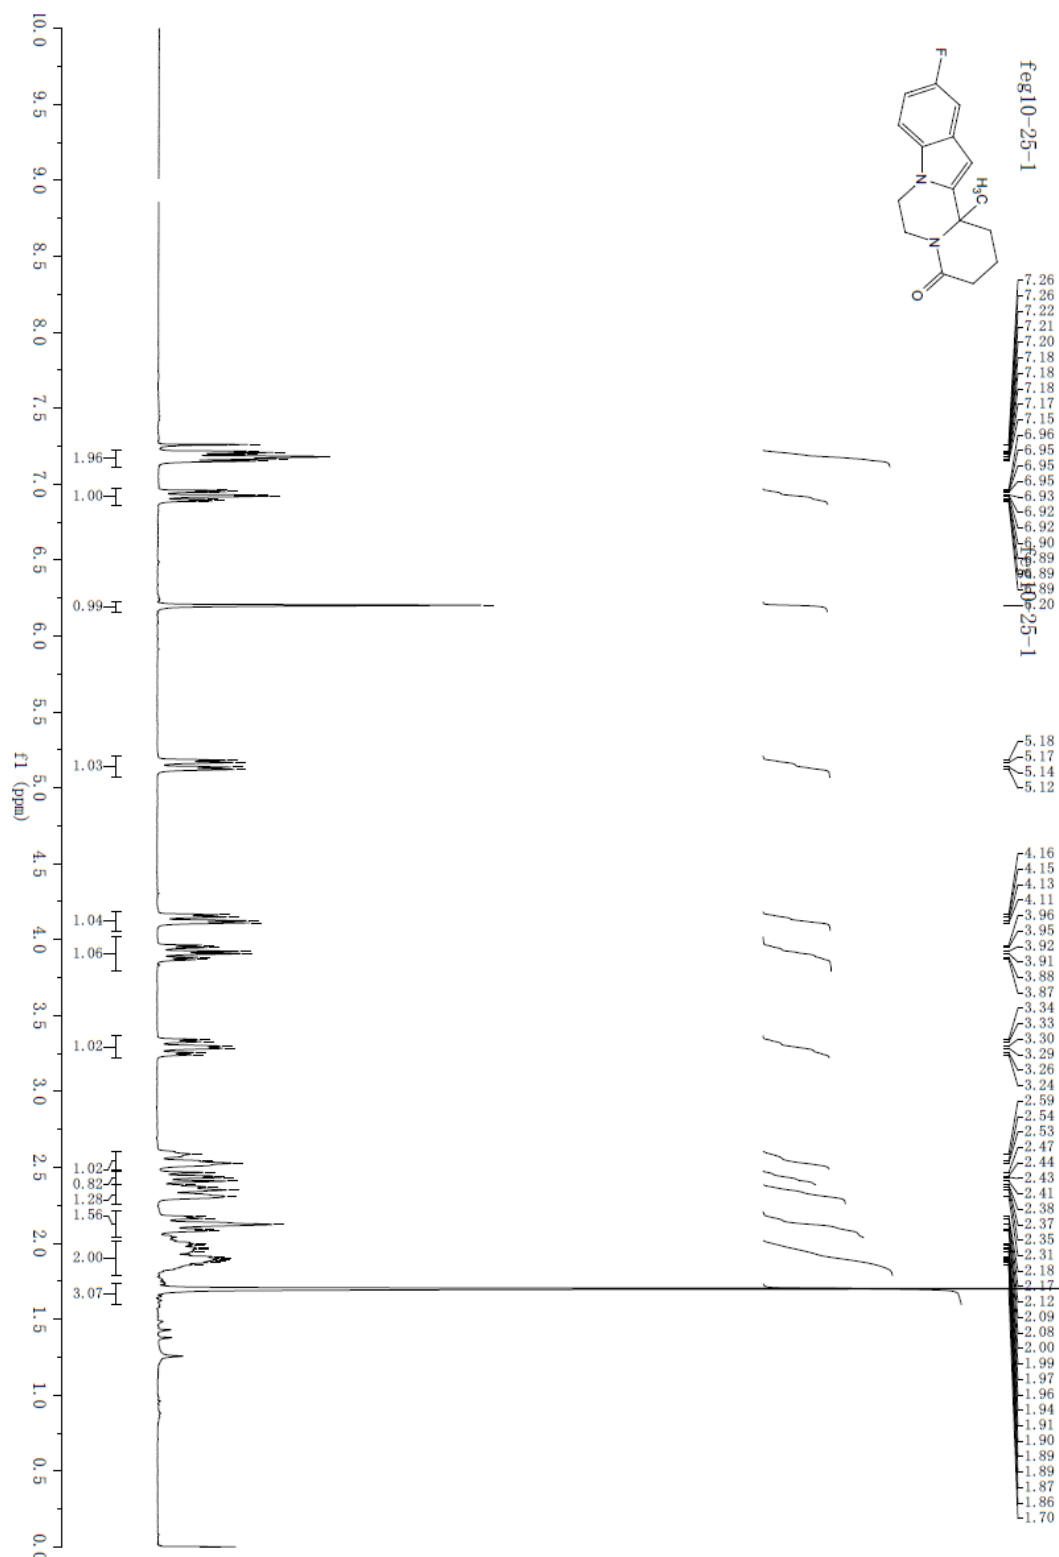

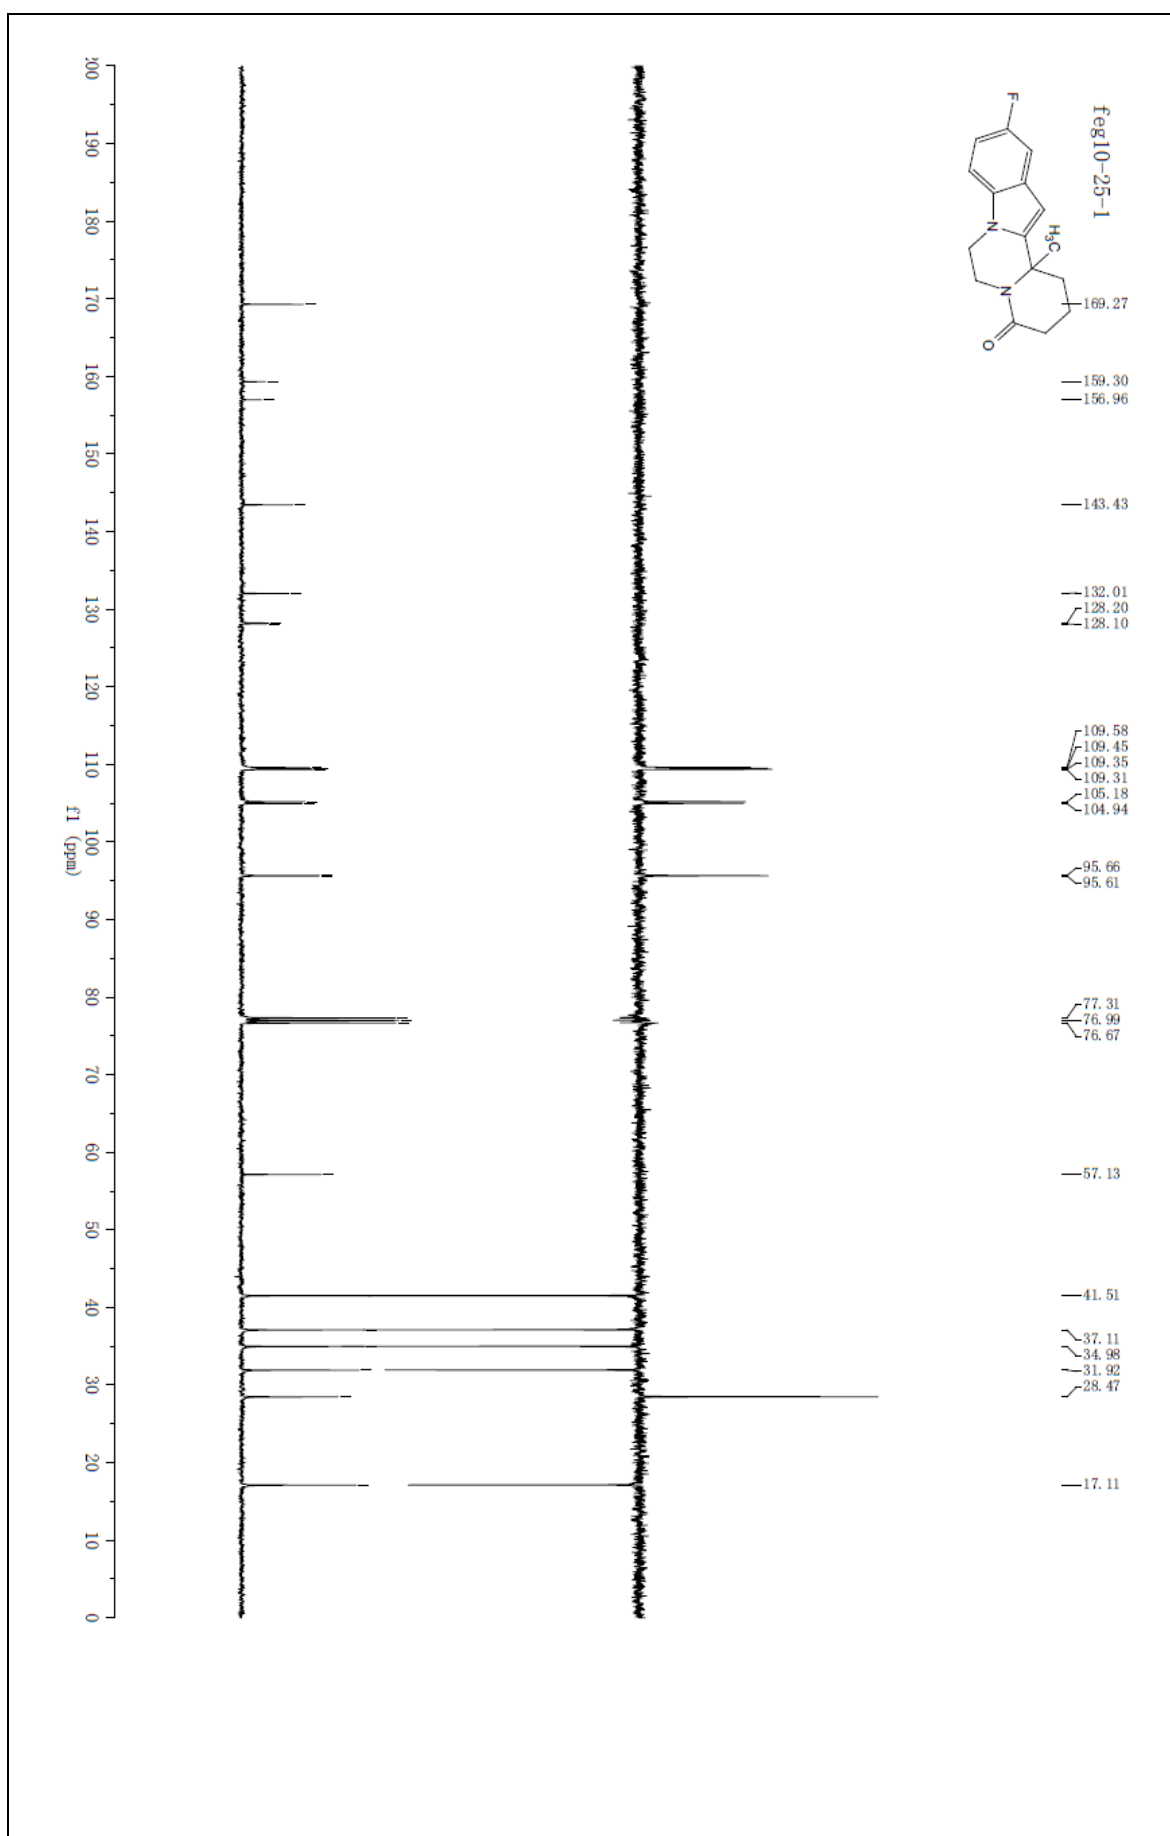

# Compound 3Ag

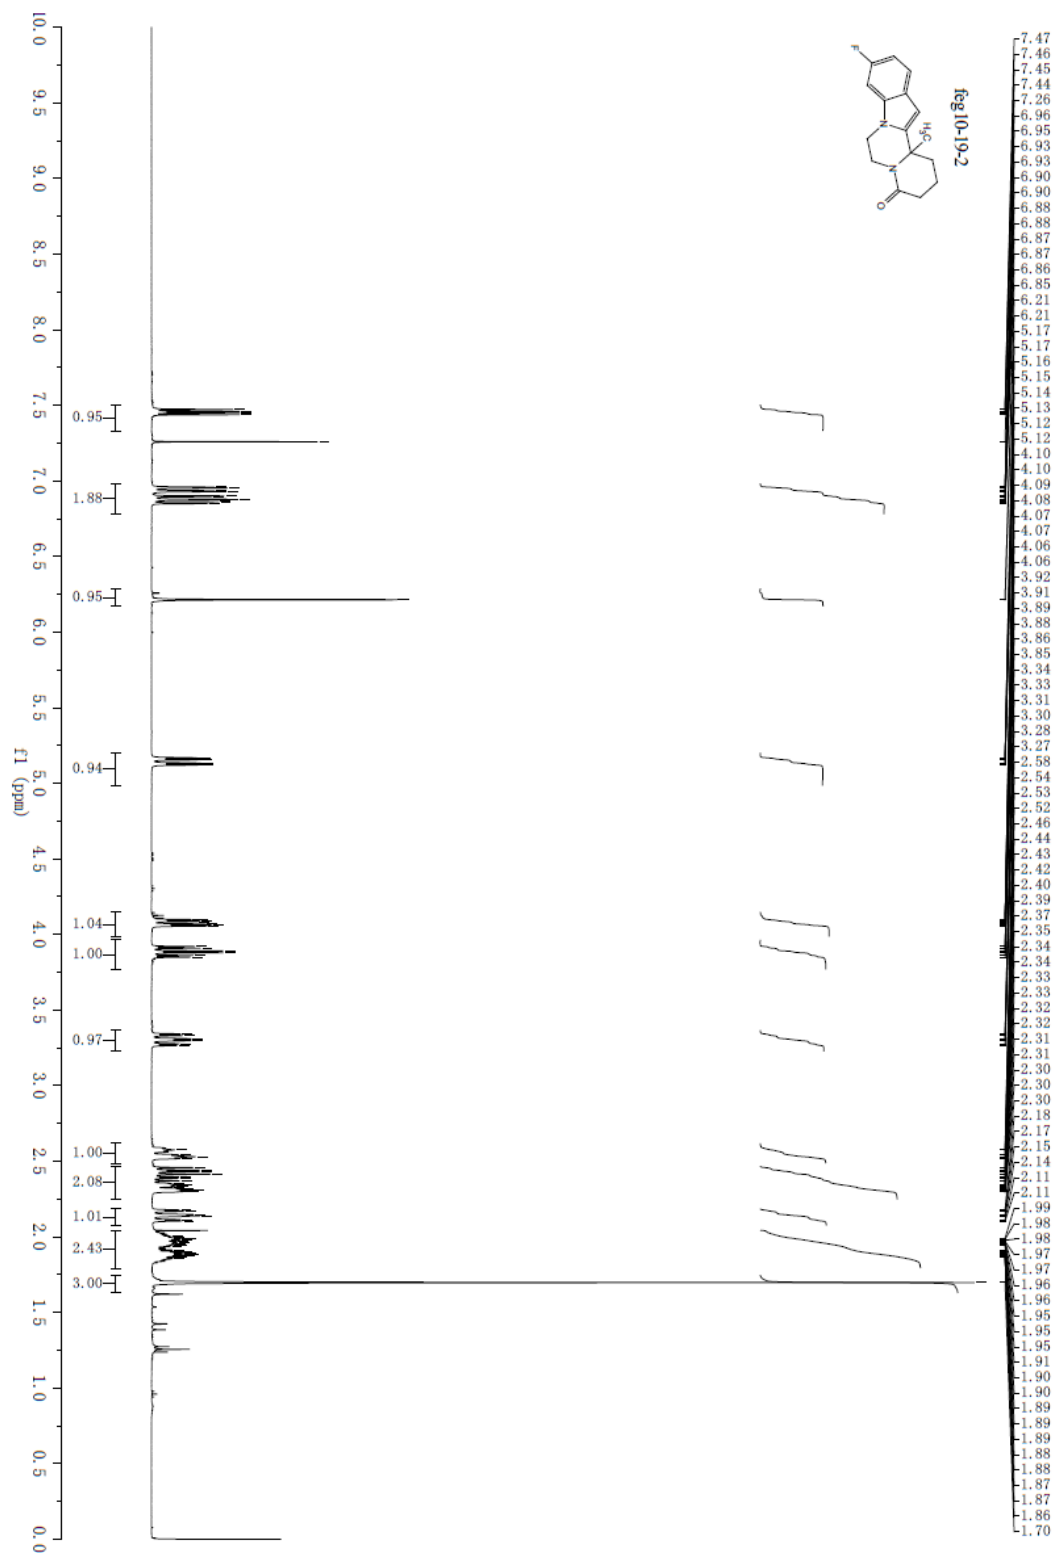

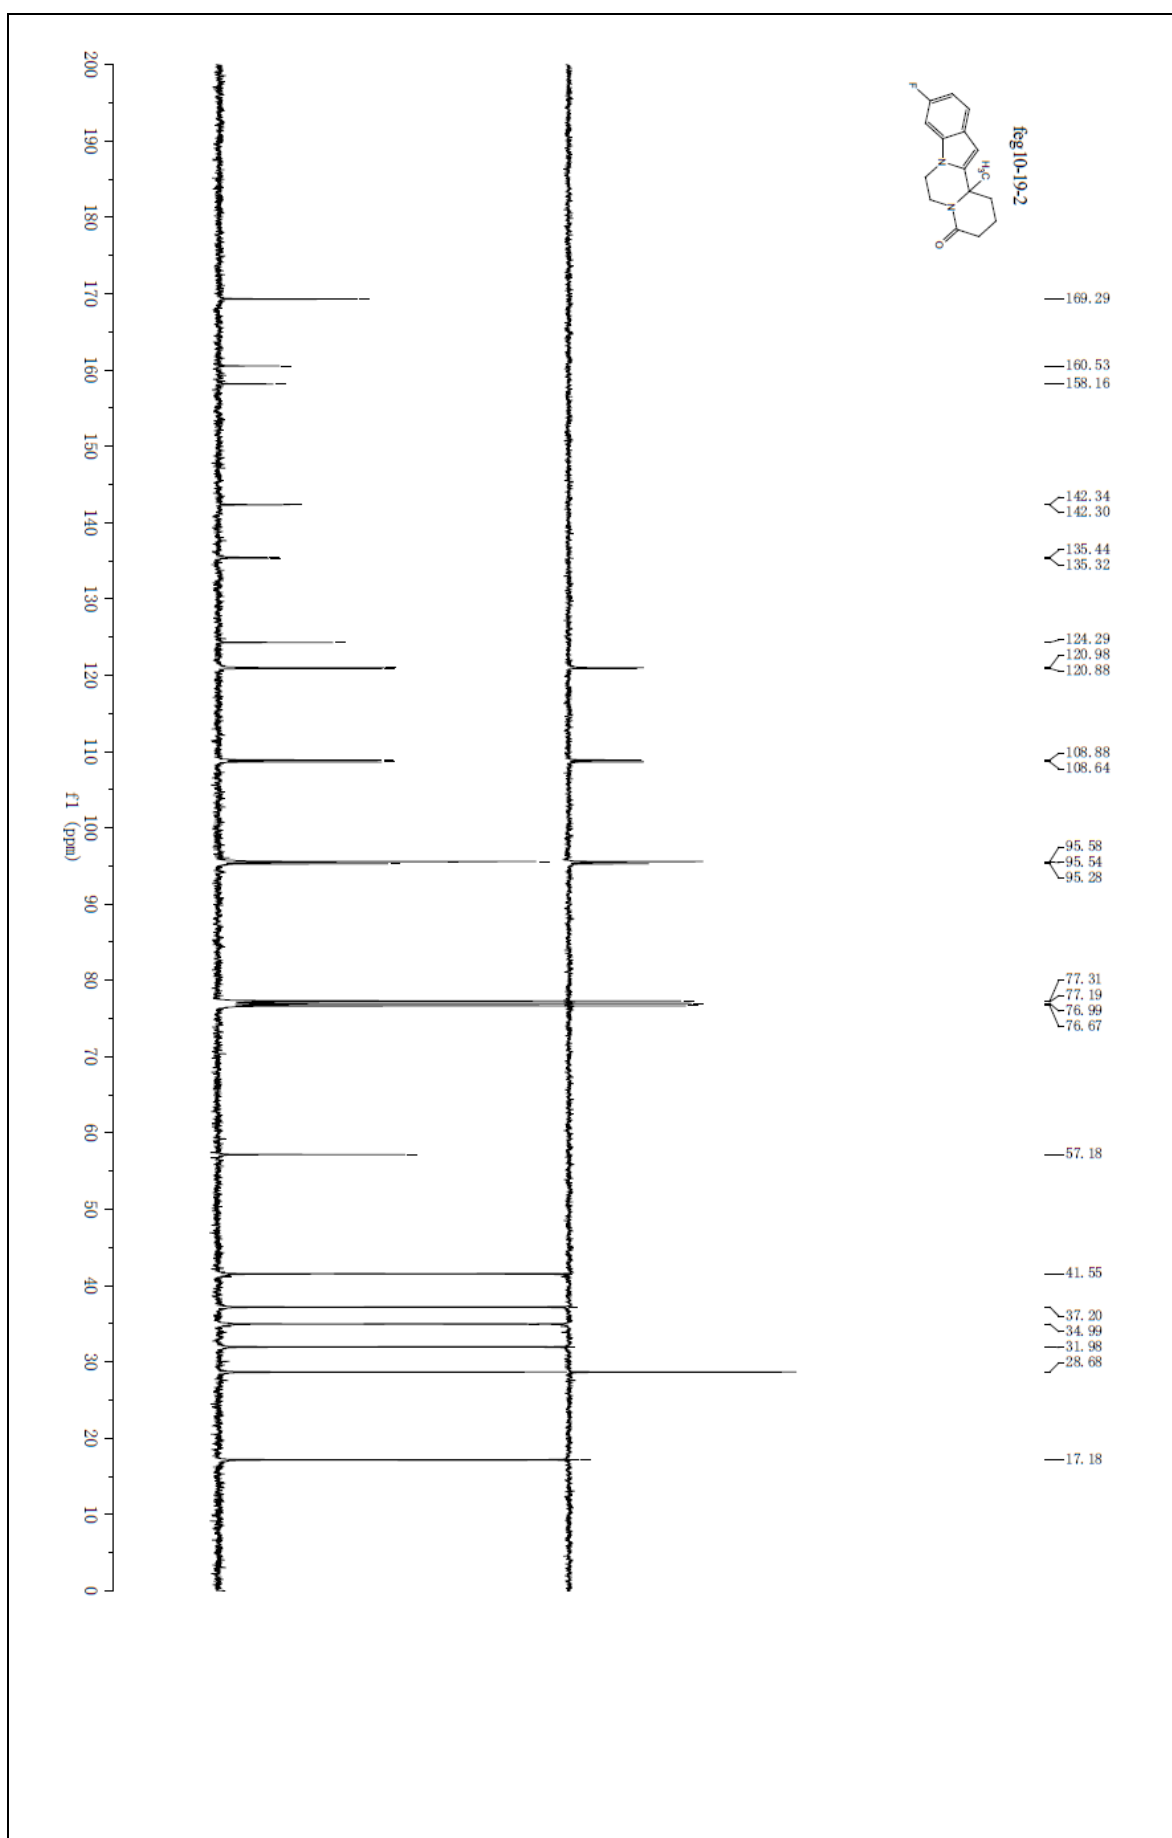

# Compound 3Ah

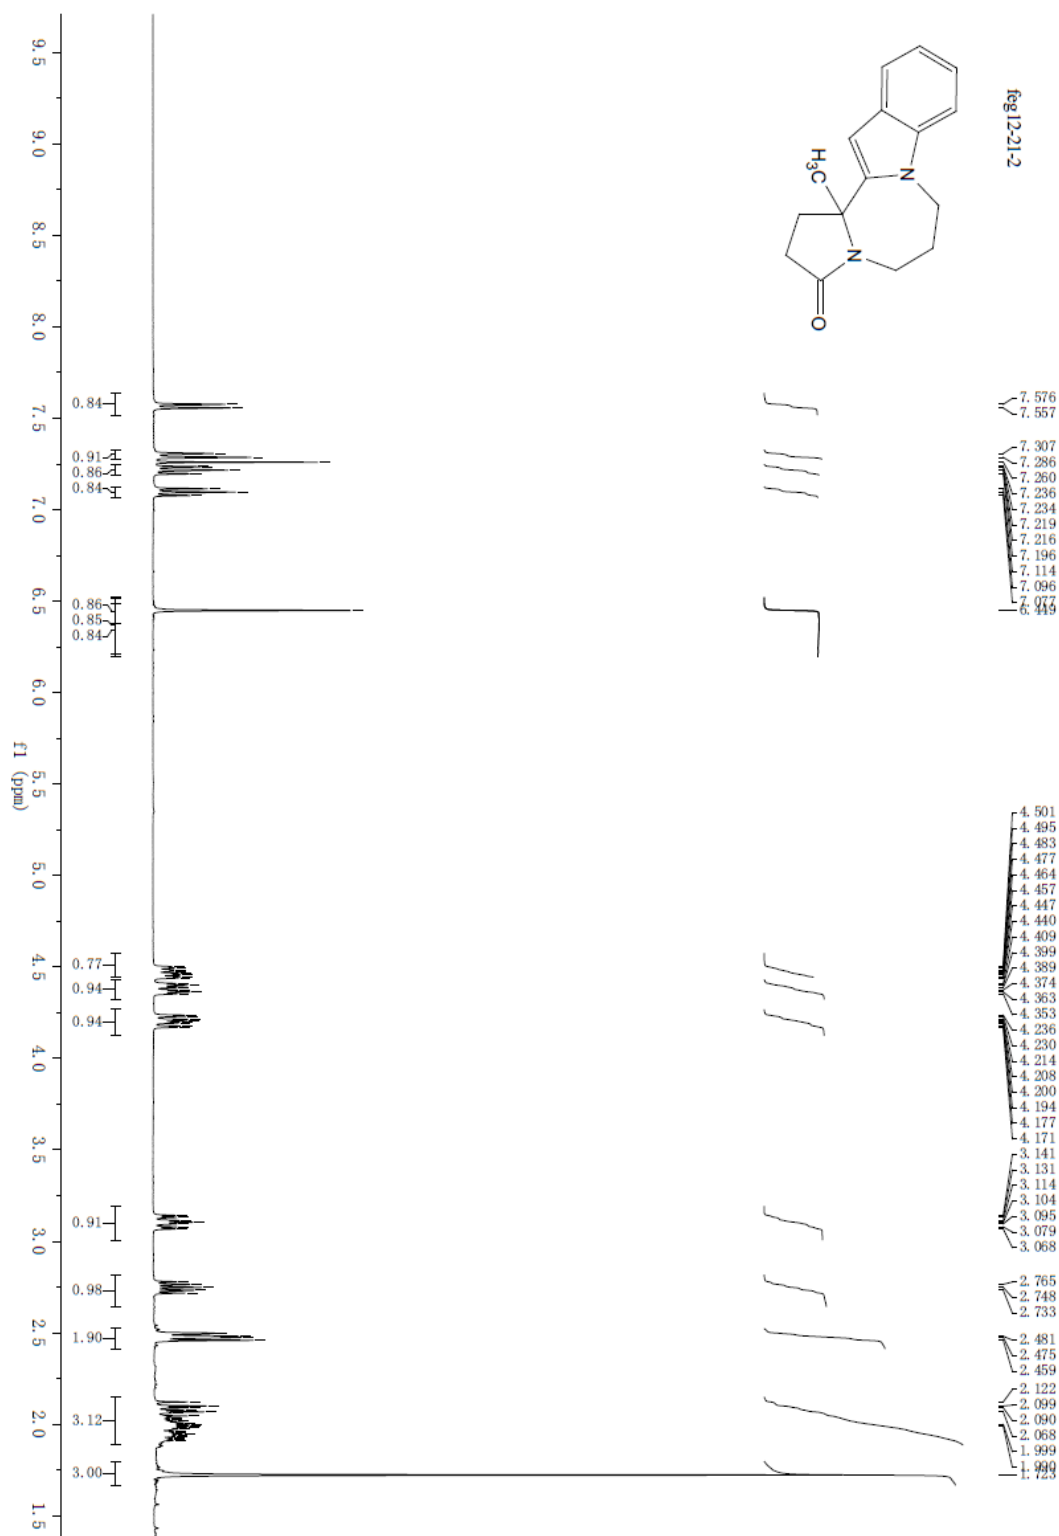



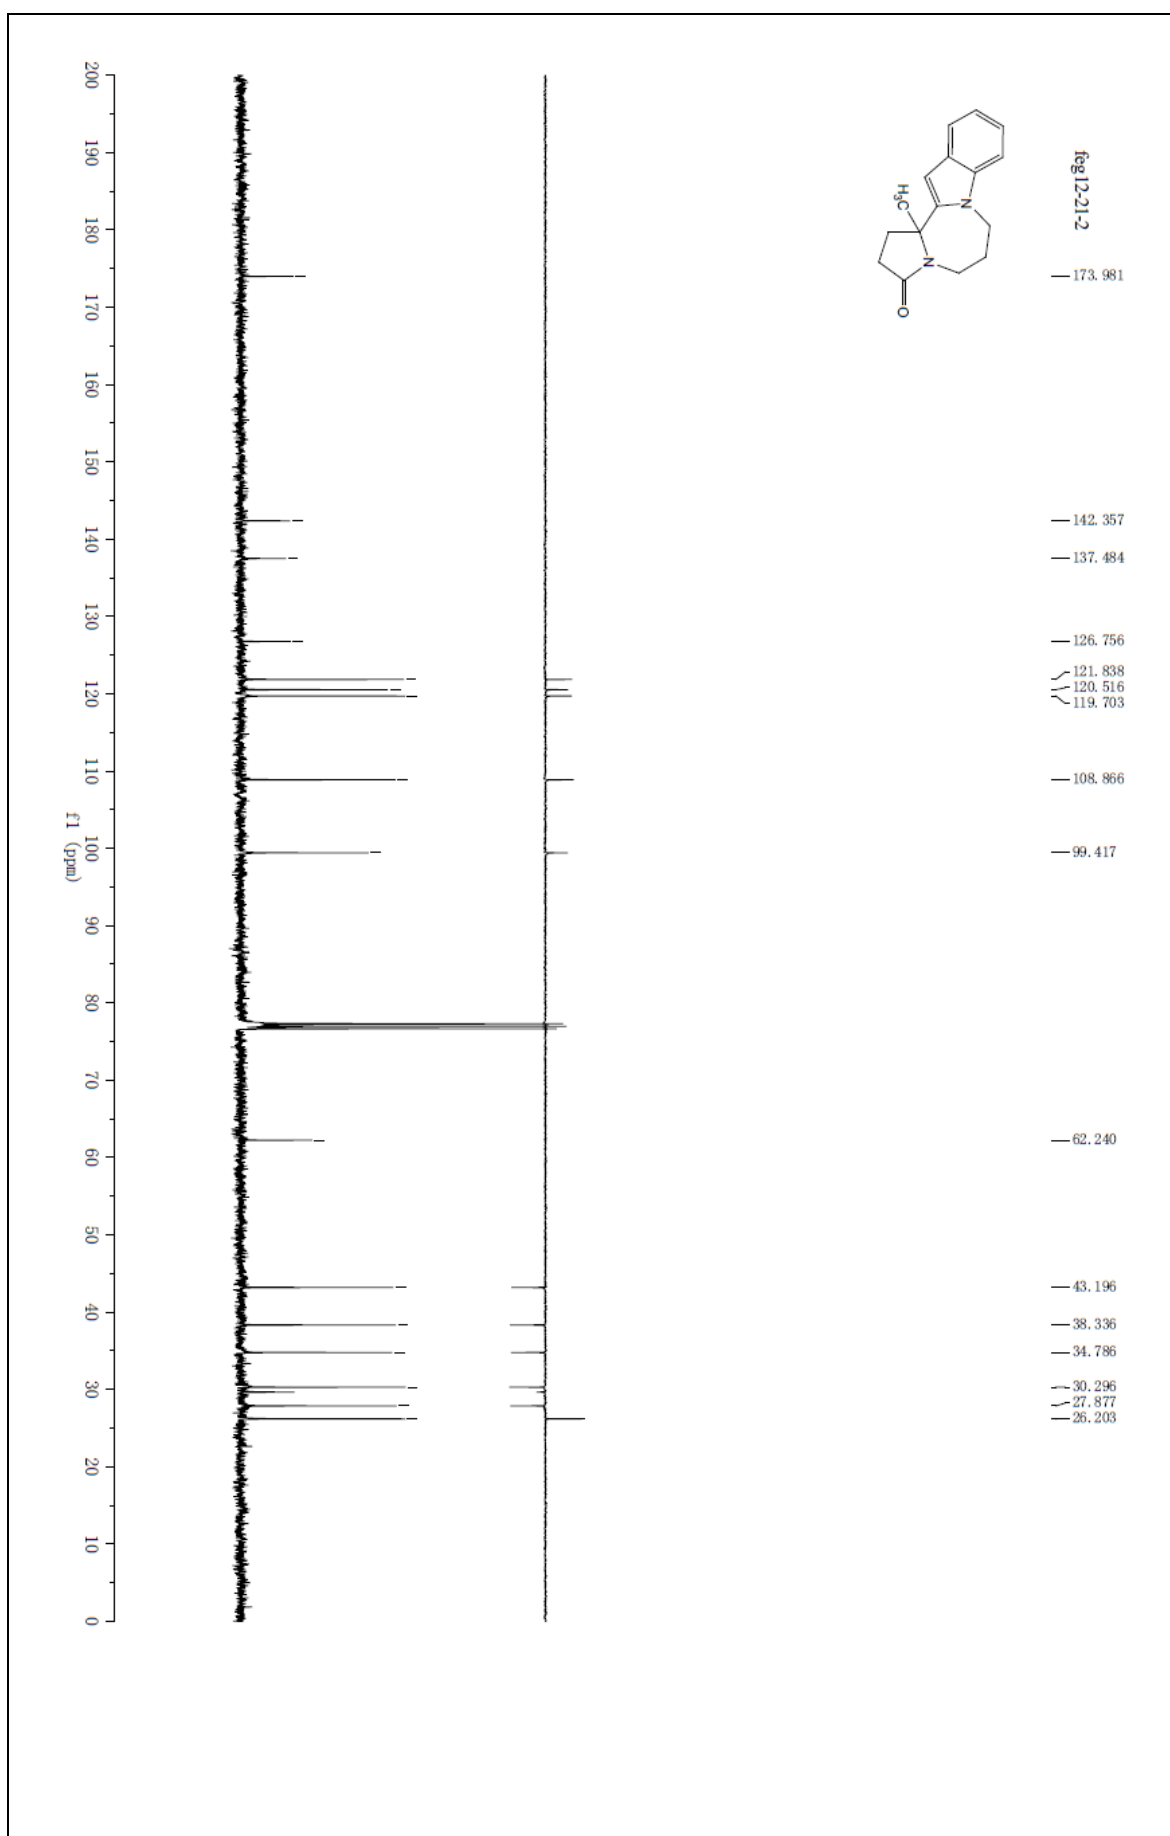

# Compound 3Ai

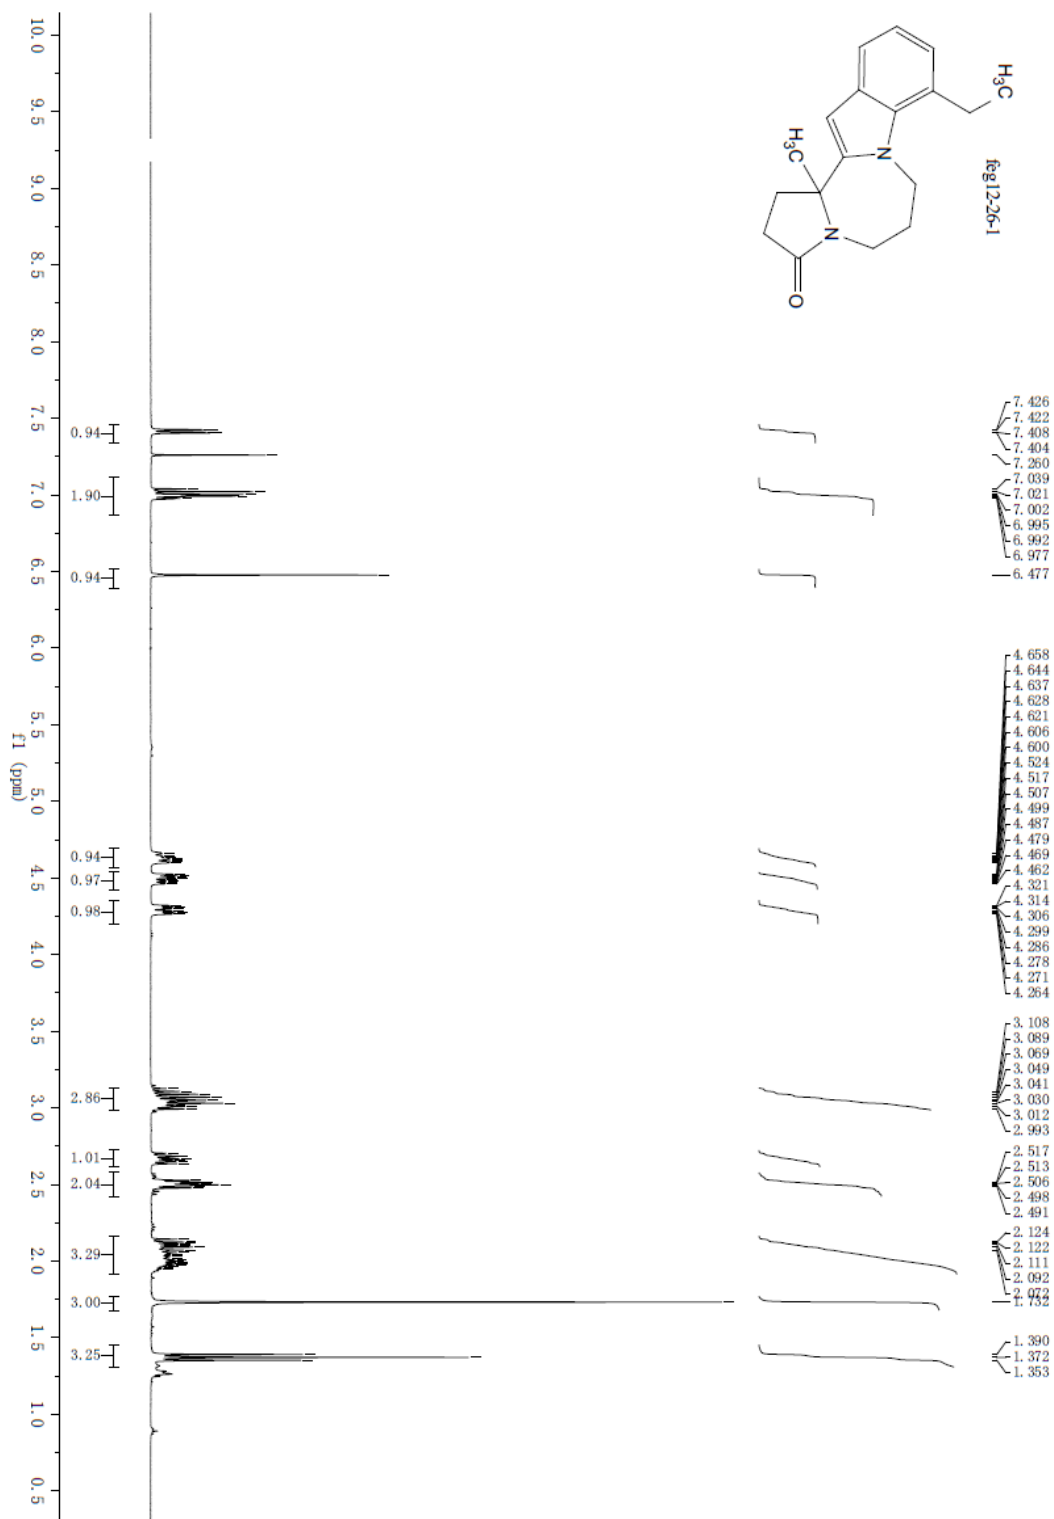

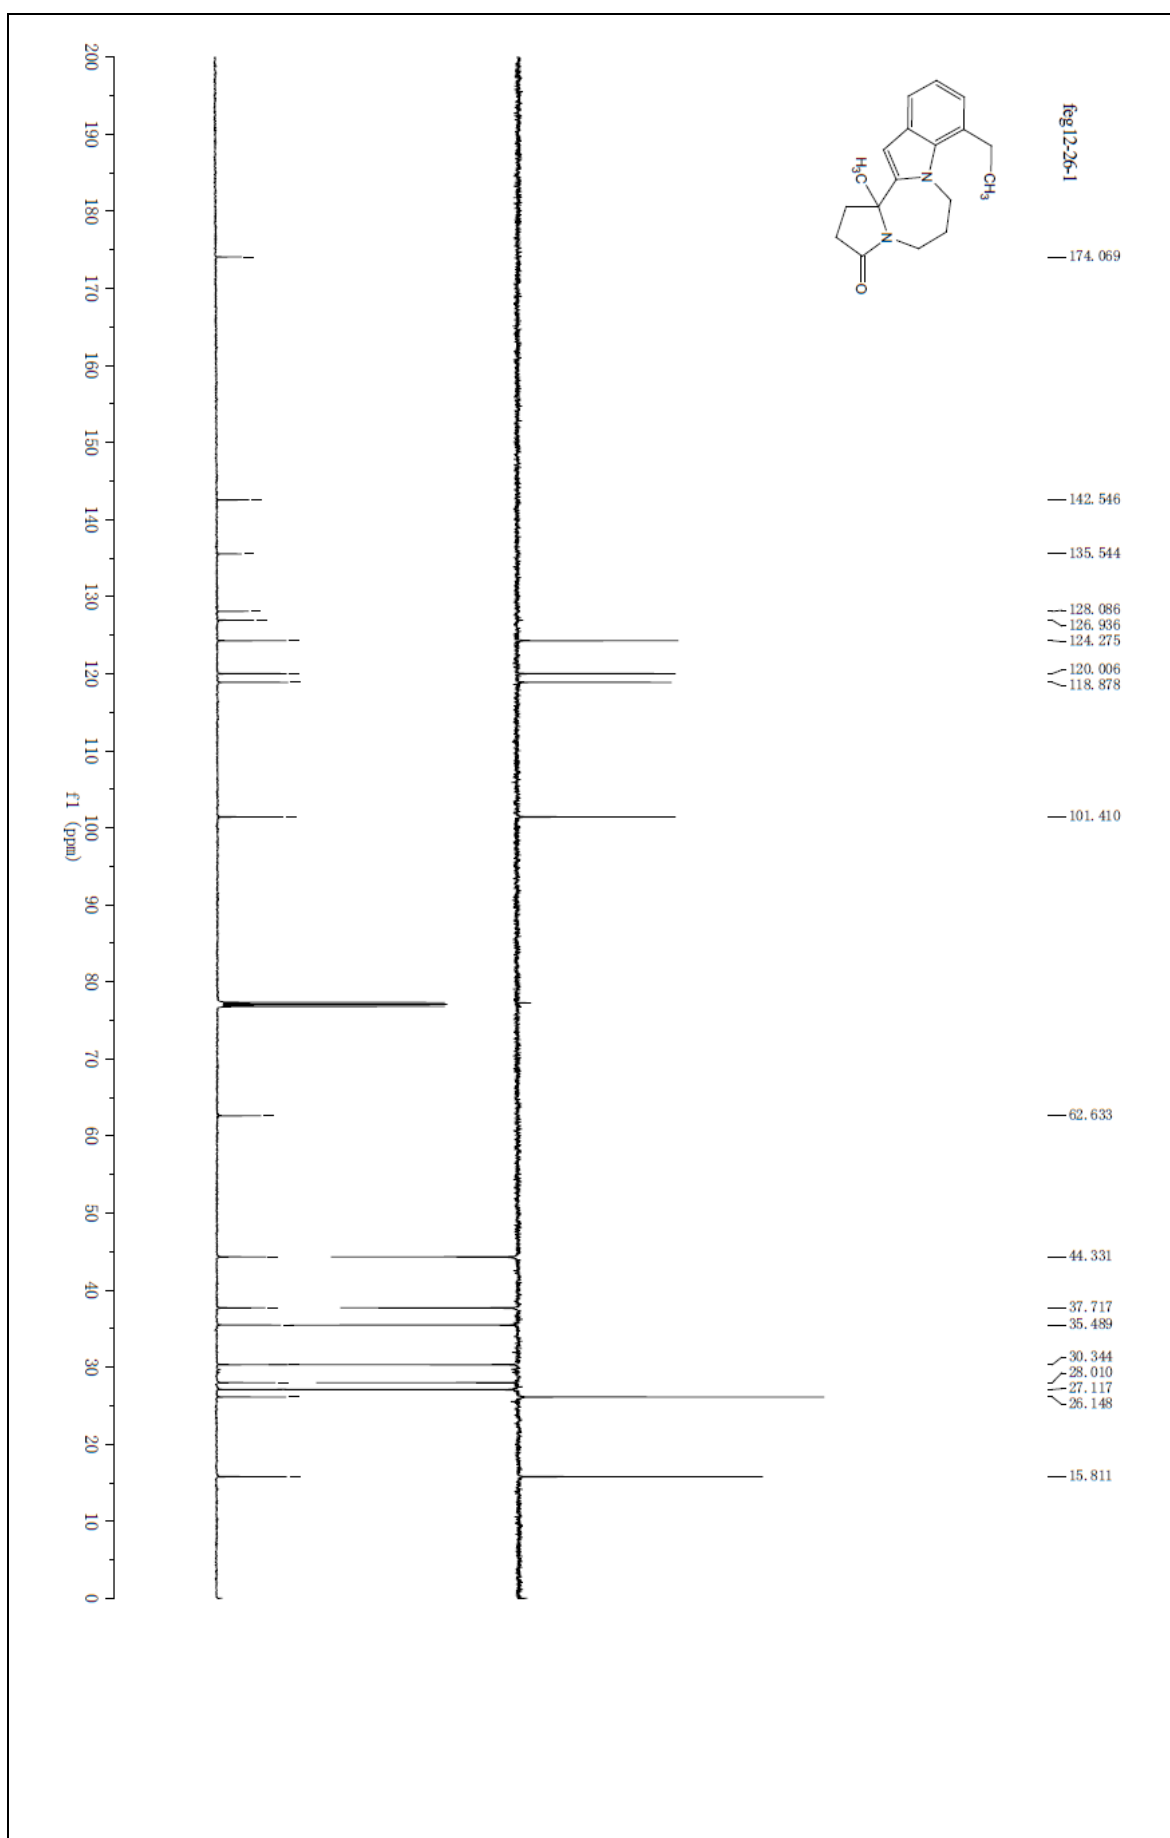

# Compound 3Aj

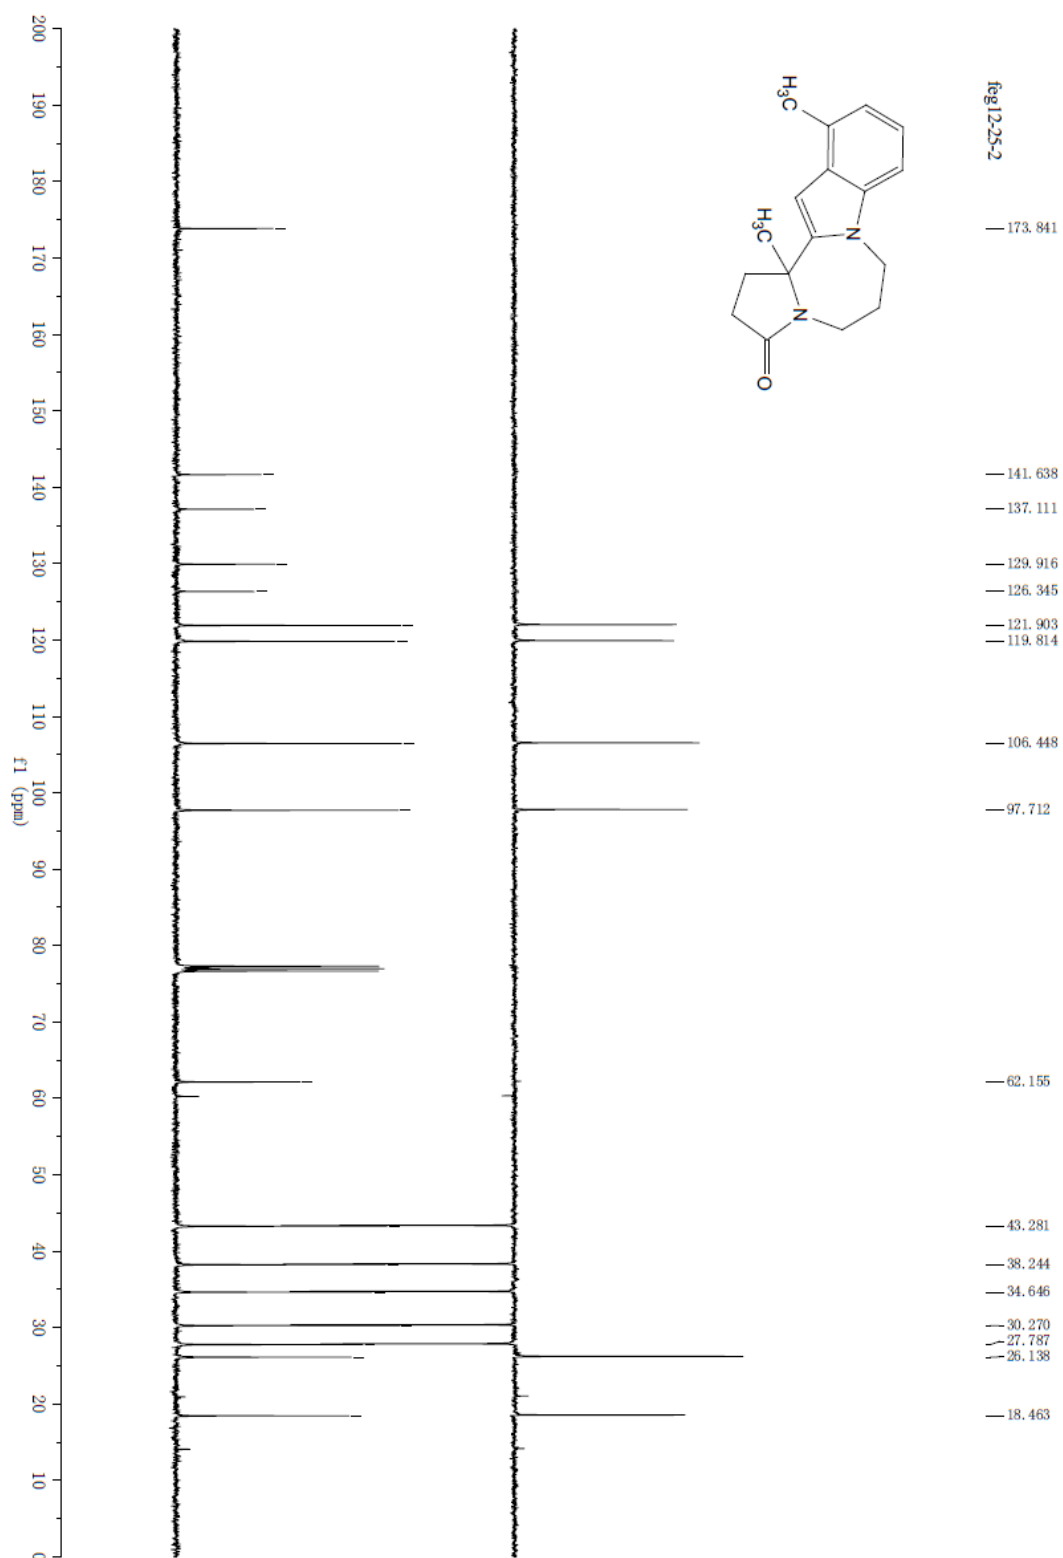

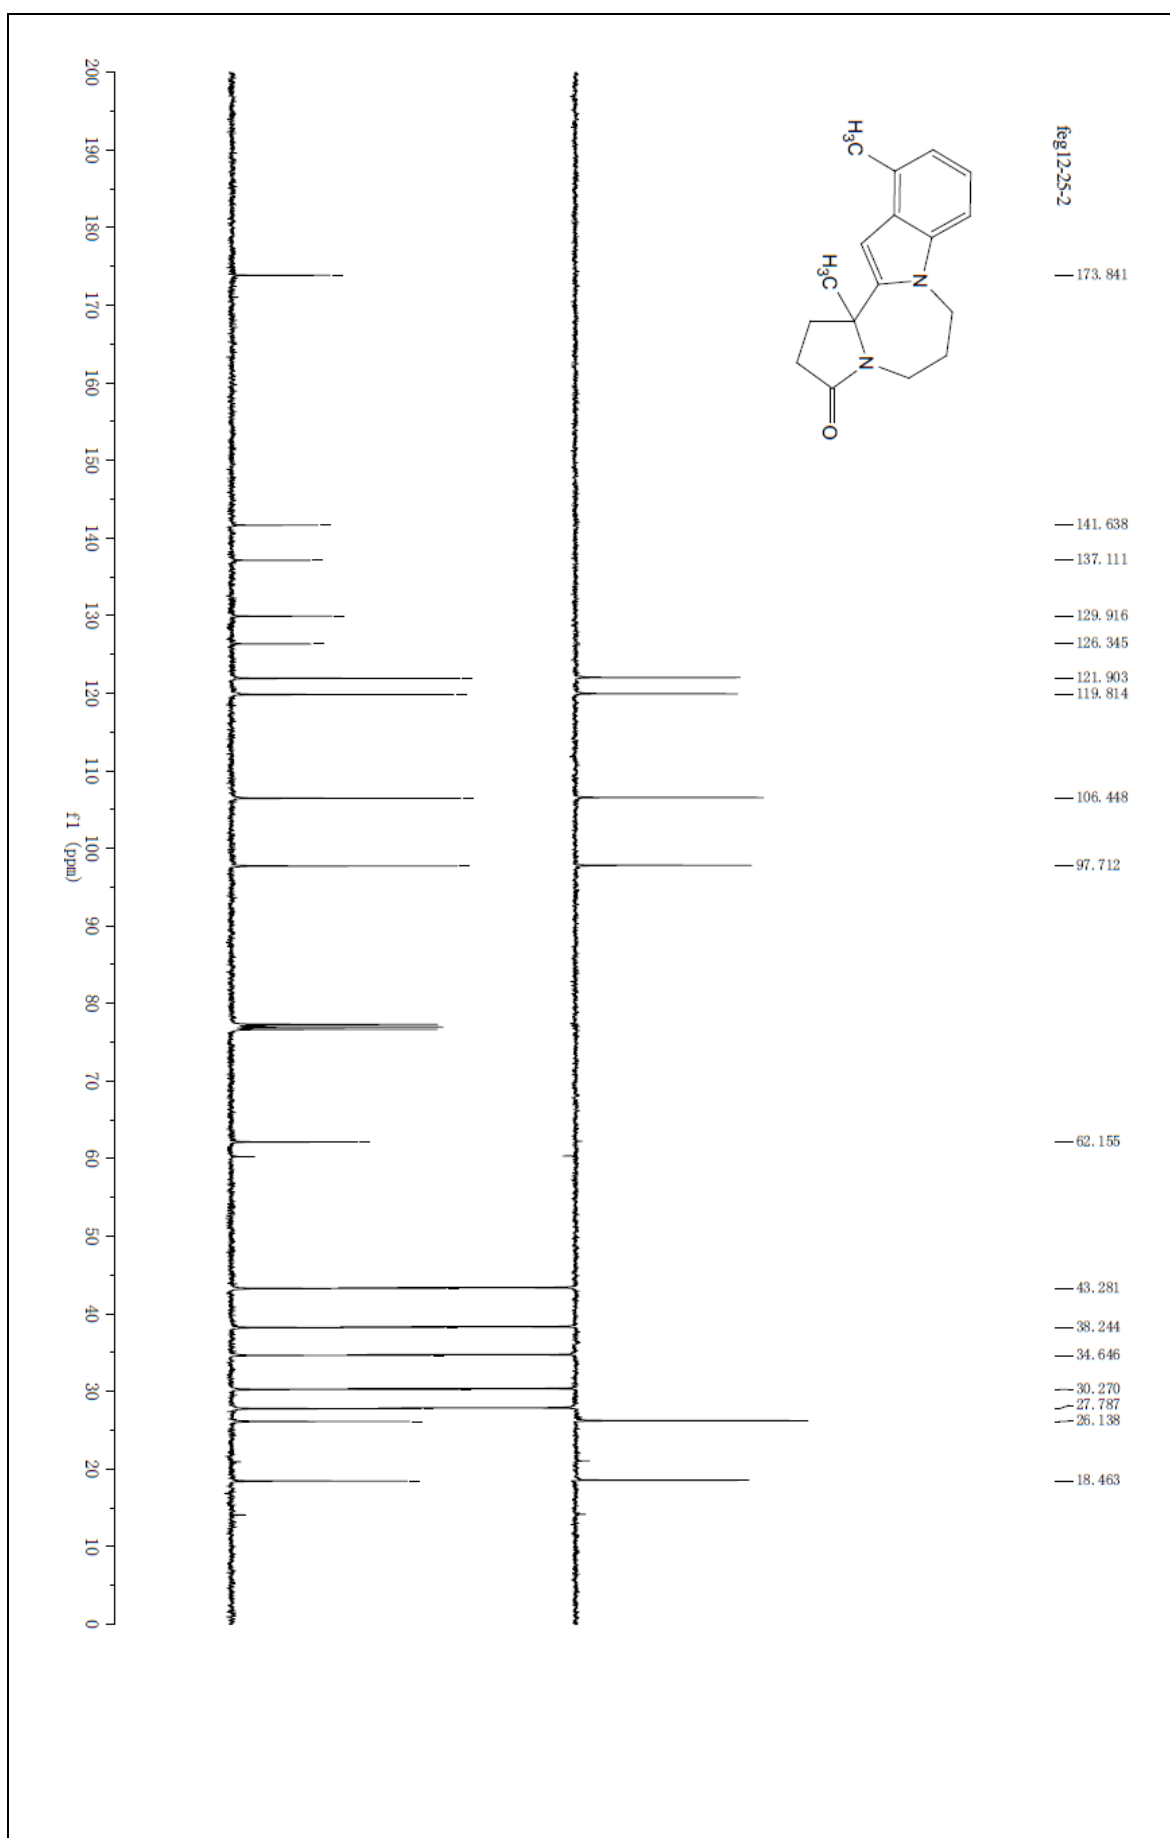

# Compound 3Ak

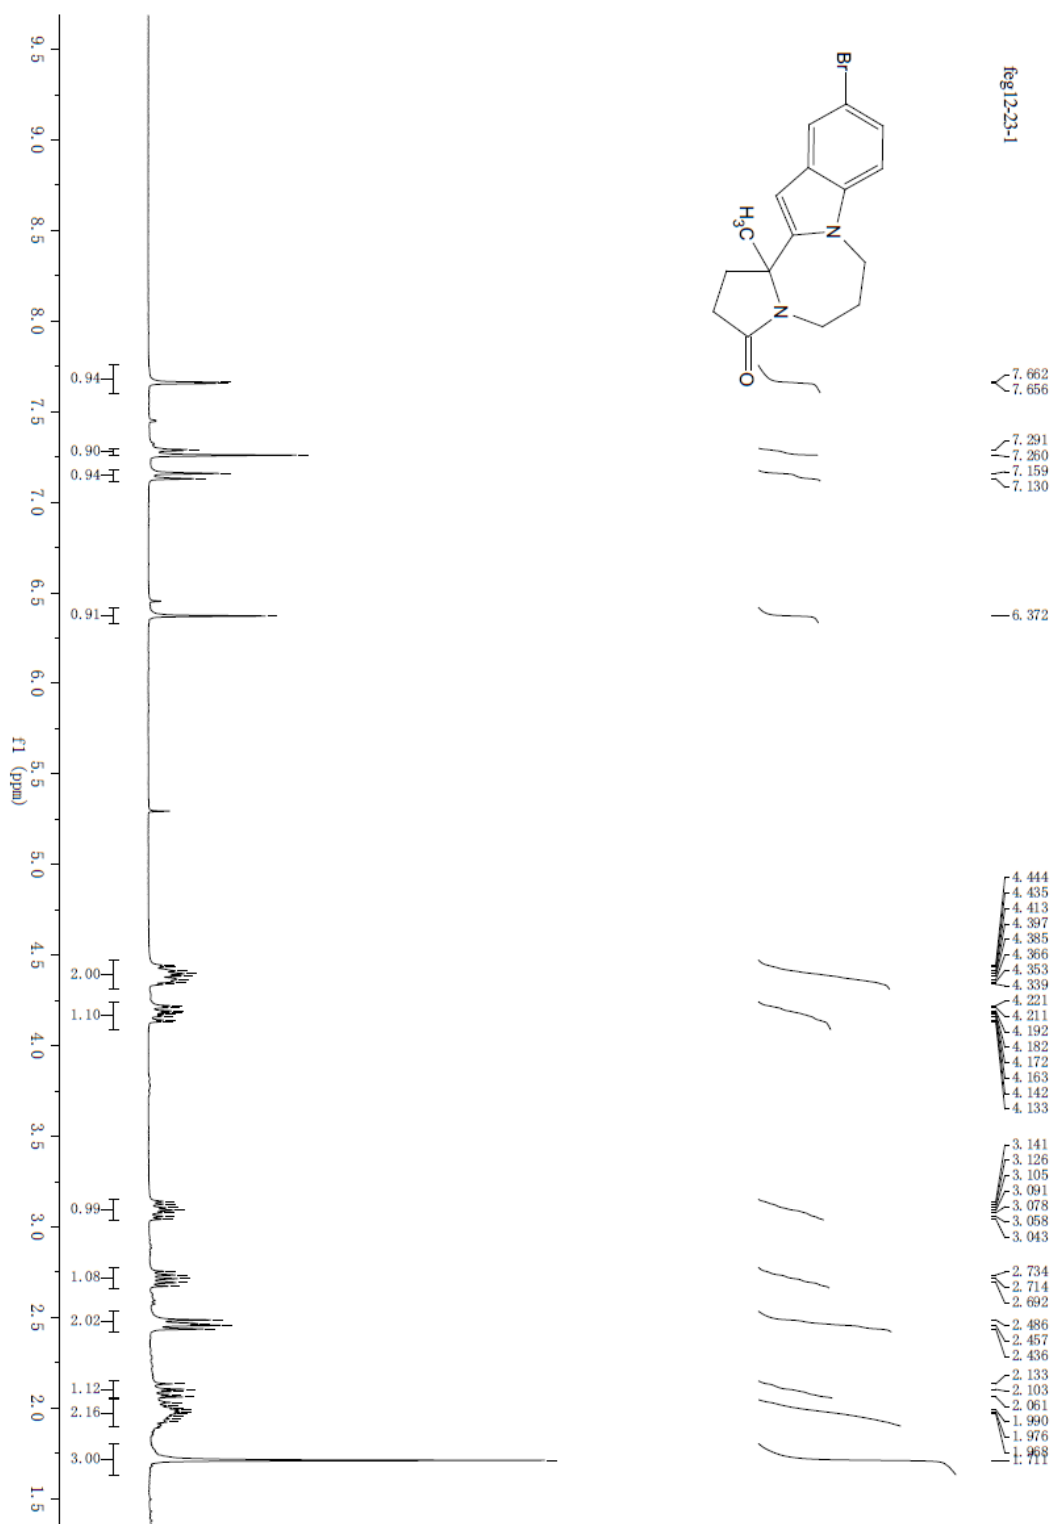

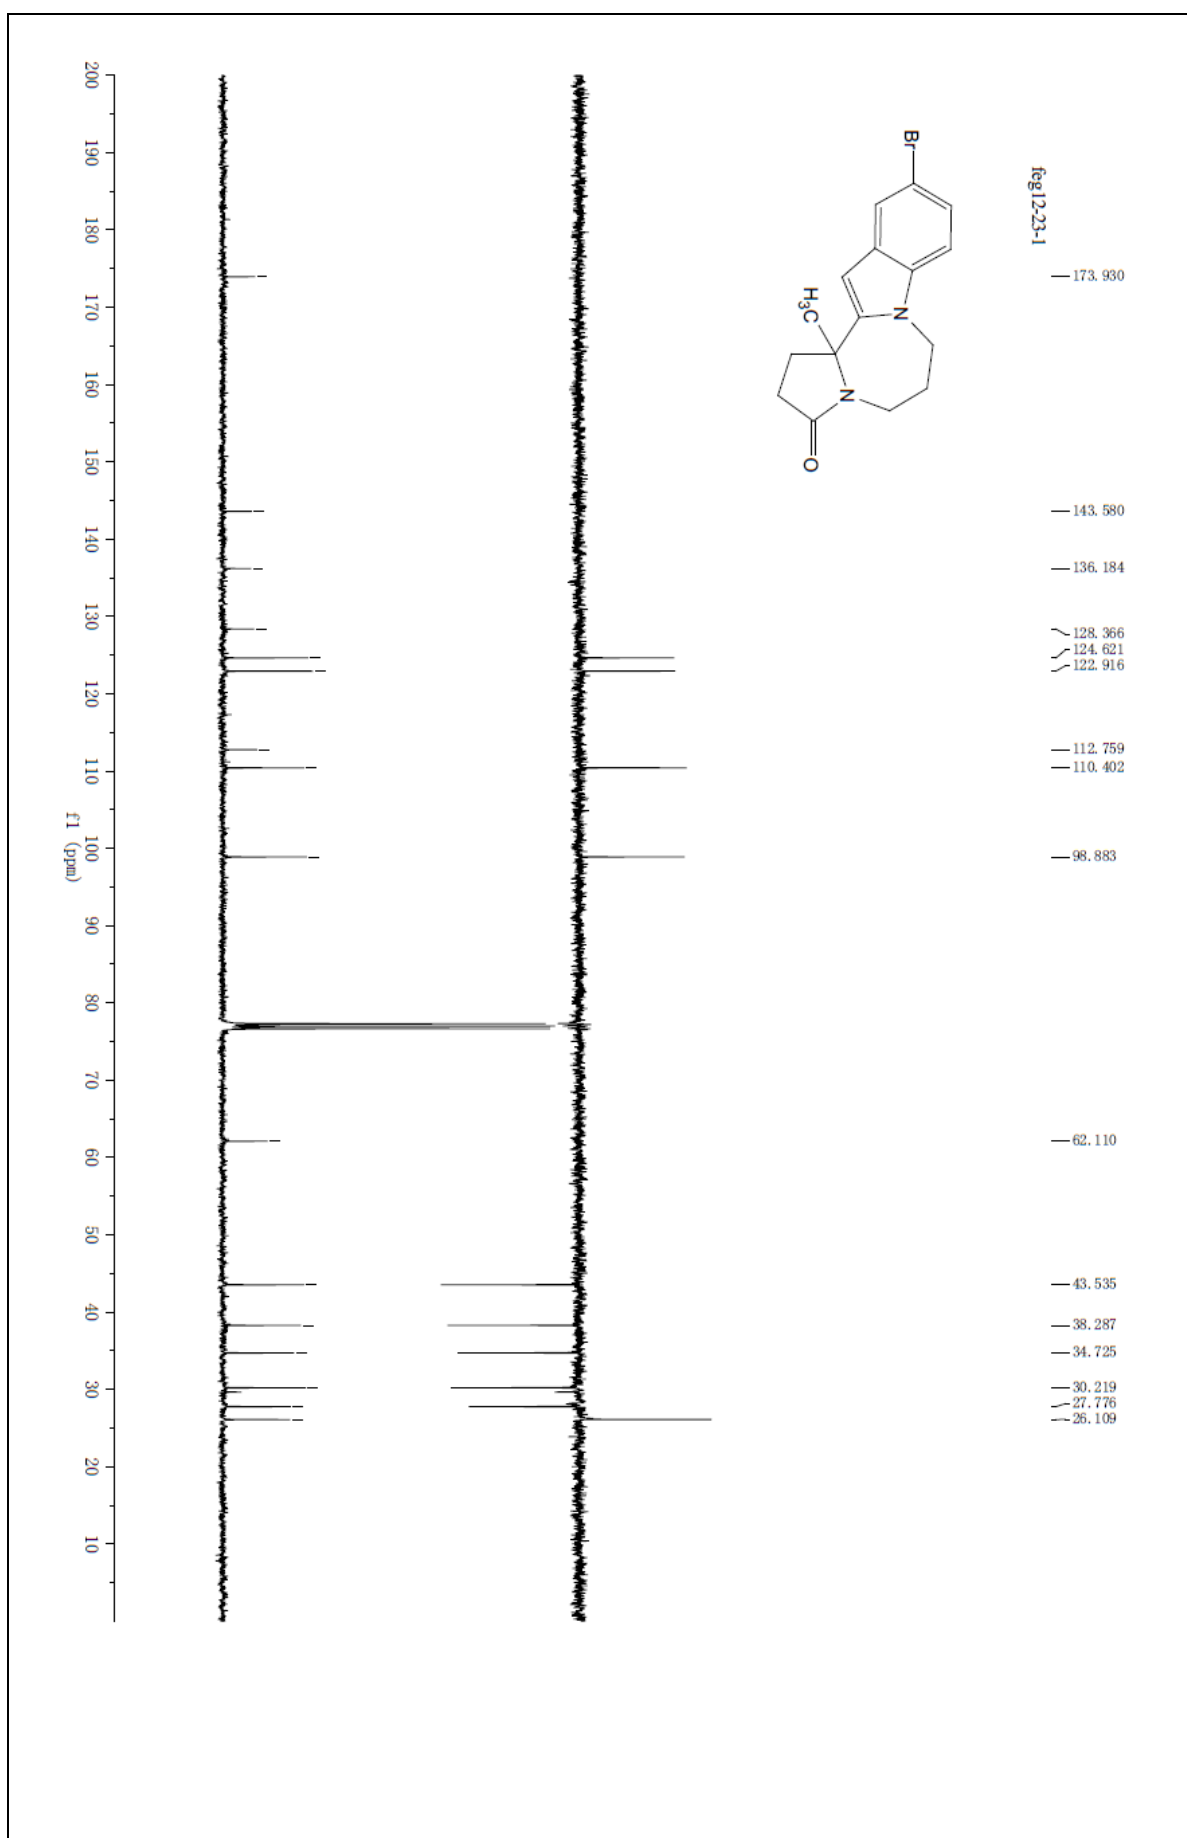

# Compound 3Al

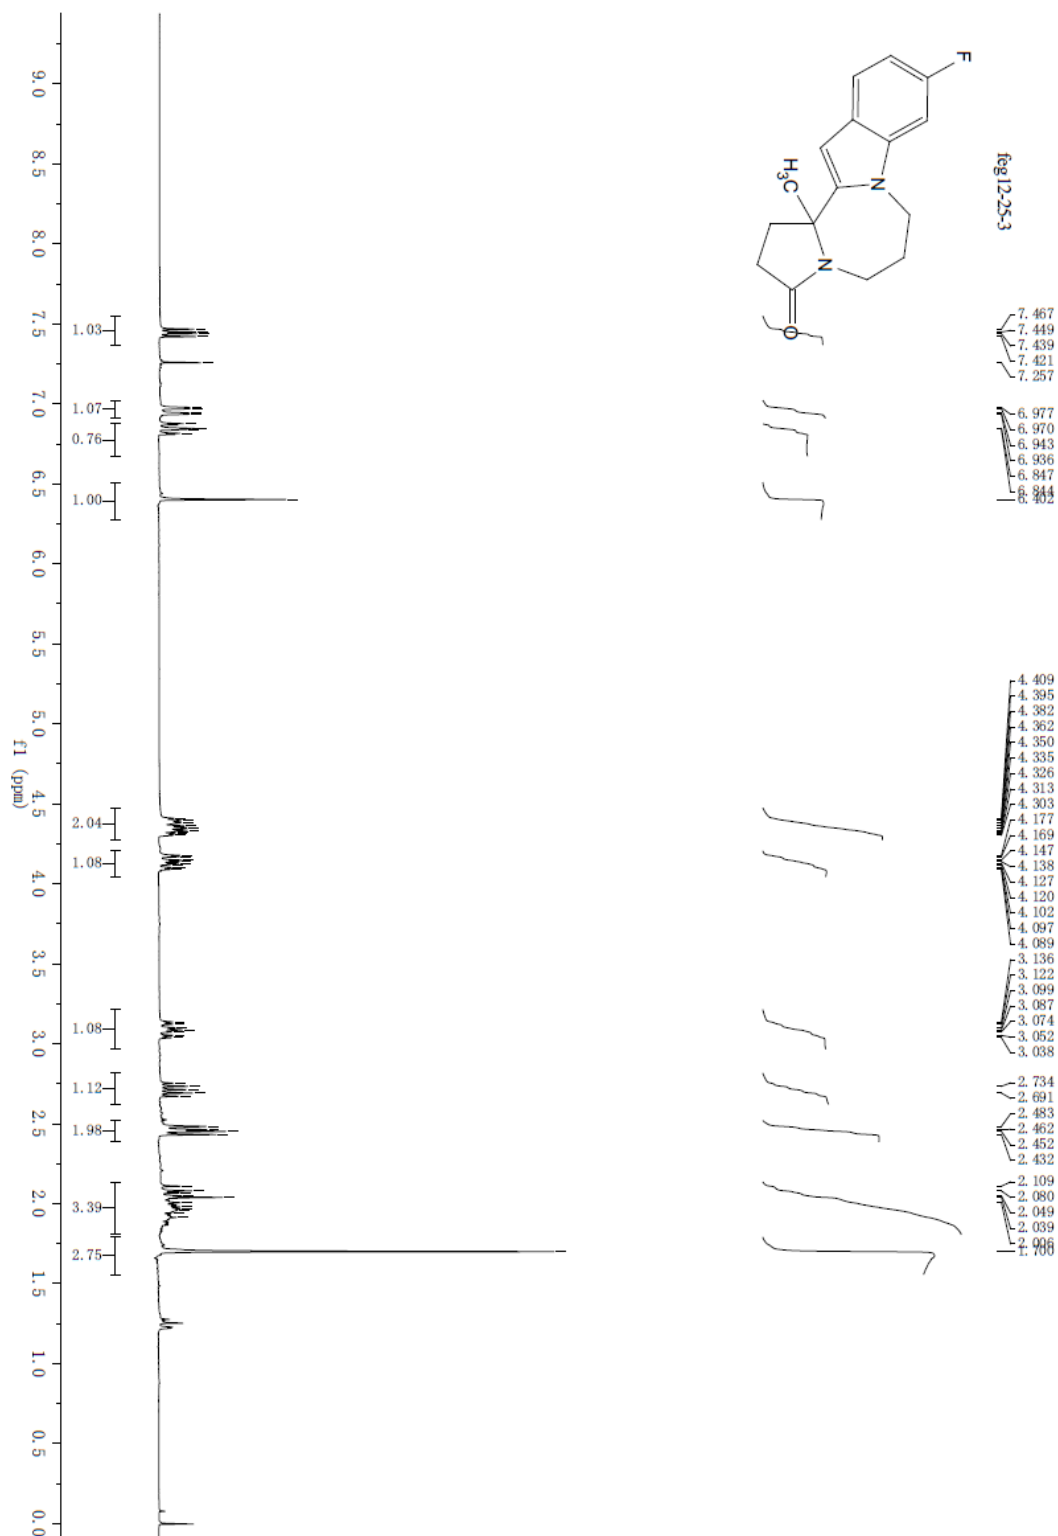



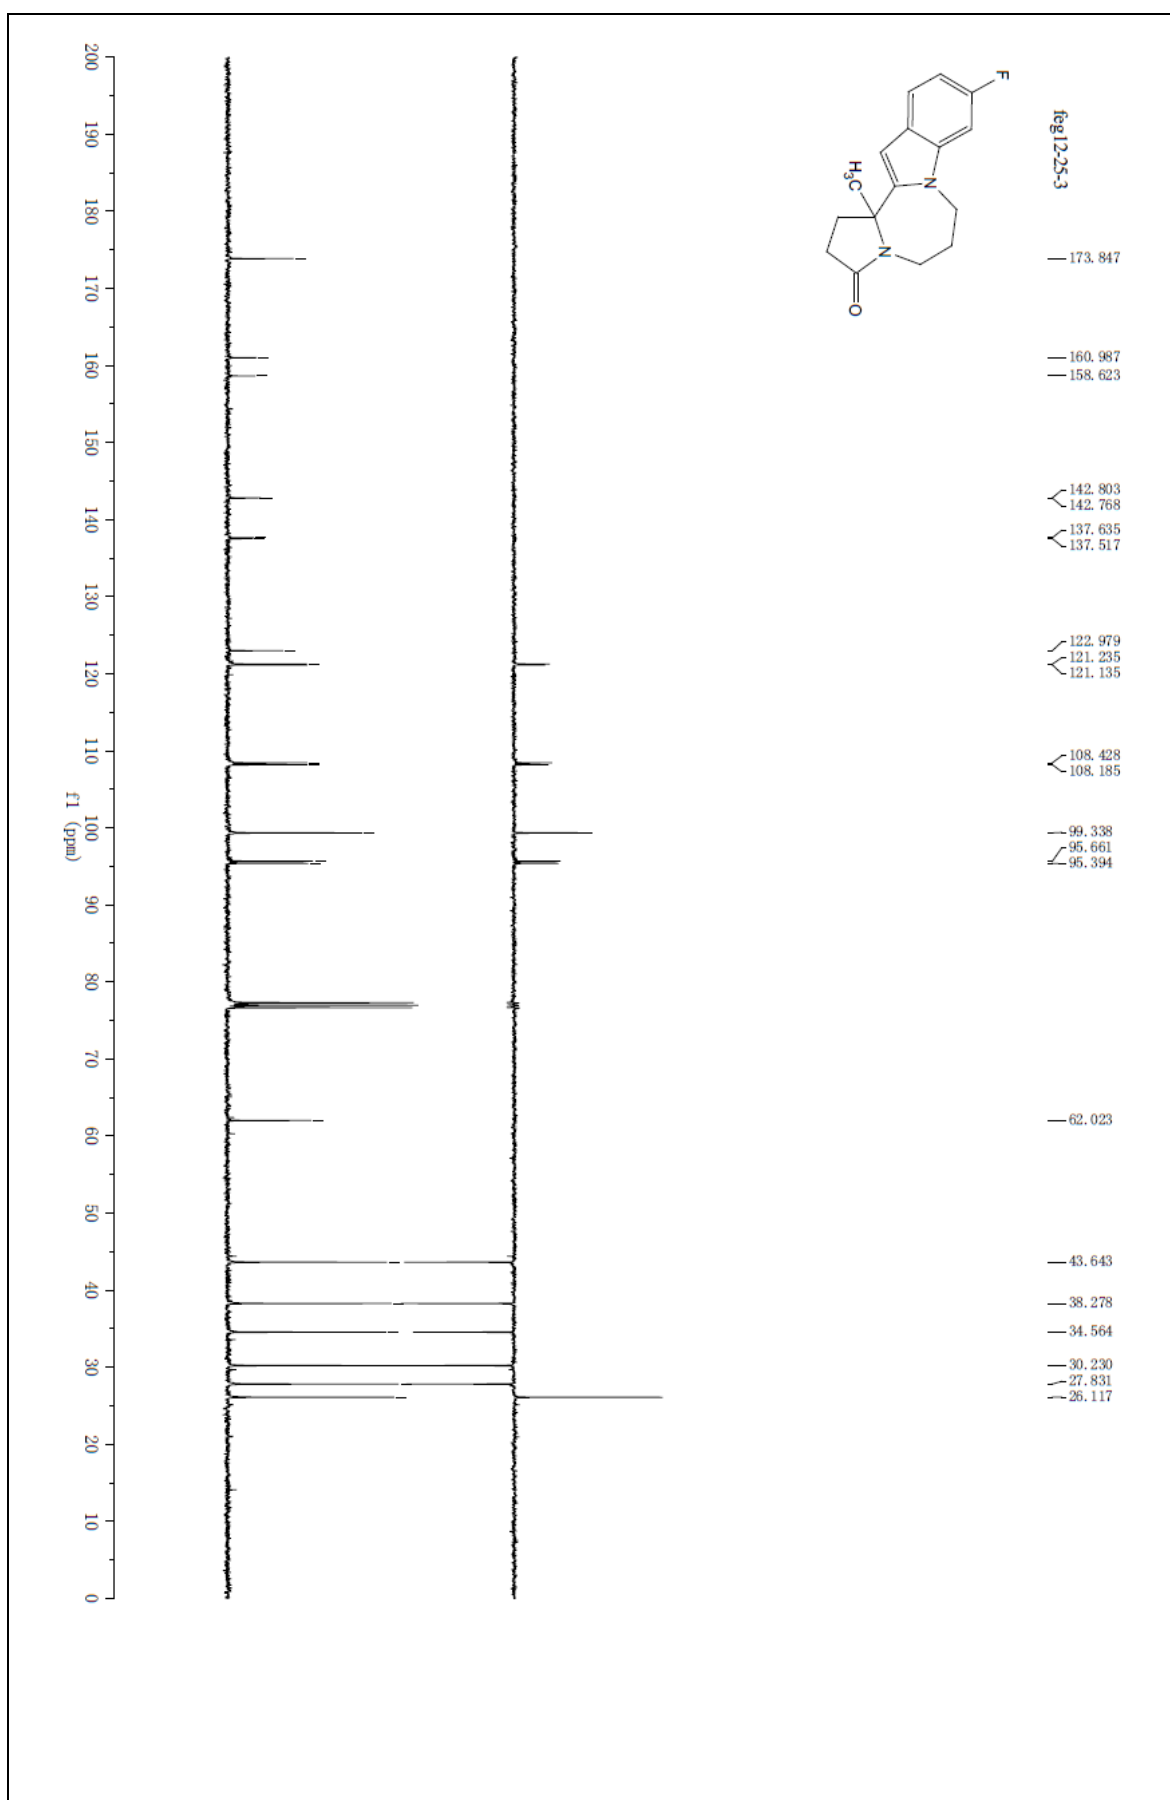

Supplement: c2gc35293a.pdf [file c2gc35293a.pdf]
